# Supplementary material
Source: publisher figshare collection journal article supplement (https://acs.figshare.com/ndownloader/files/4135072)
Supplement: Supplementary file 1 [file 4135072]

data_mn2044 

_audit_update_record
;
2010-11-12 # Formatted by publCIF
;
 
_audit_creation_method            SHELXL-97 
_chemical_name_systematic 
; 
 ? 
; 
_chemical_name_common             Sm@C2(5)-C82.Ni(OEP).2benzene
_chemical_melting_point           ? 
_chemical_formula_moiety          'C82 Sm, C36 H44 N4 Ni, 2(C6 H6)'
_chemical_formula_sum 
 'C130 H56 N4 Ni Sm' 
_chemical_formula_weight          1882.85 
 
loop_ 
 _atom_type_symbol 
 _atom_type_description 
 _atom_type_scat_dispersion_real 
 _atom_type_scat_dispersion_imag 
 _atom_type_scat_source 
 'C'  'C'   0.0033   0.0016 
 'International Tables Vol C Tables 4.2.6.8 and 6.1.1.4' 
 'H'  'H'   0.0000   0.0000 
 'International Tables Vol C Tables 4.2.6.8 and 6.1.1.4' 
 'N'  'N'   0.0061   0.0033 
 'International Tables Vol C Tables 4.2.6.8 and 6.1.1.4' 
 'Ni'  'Ni'   0.3393   1.1124 
 'International Tables Vol C Tables 4.2.6.8 and 6.1.1.4' 
 'Sm'  'Sm'  -0.1638   3.4418 
 'International Tables Vol C Tables 4.2.6.8 and 6.1.1.4' 
 
_symmetry_cell_setting            monoclinic 
_symmetry_space_group_name_H-M    'C 2/m' 
_symmetry_space_group_name_hall   '-C 2y'
 
loop_ 
 _symmetry_equiv_pos_as_xyz 
 'x, y, z' 
 '-x, y, -z' 
 'x+1/2, y+1/2, z' 
 '-x+1/2, y+1/2, -z' 
 '-x, -y, -z' 
 'x, -y, z' 
 '-x+1/2, -y+1/2, -z' 
 'x+1/2, -y+1/2, z' 
 
_cell_length_a                    25.3364(4) 
_cell_length_b                    15.0718(2) 
_cell_length_c                    19.7948(3) 
_cell_angle_alpha                 90.00 
_cell_angle_beta                  94.208(4) 
_cell_angle_gamma                 90.00 
_cell_volume                      7538.57(19) 
_cell_formula_units_Z             4 
_cell_measurement_temperature     90(2) 
_cell_measurement_reflns_used     9797 
_cell_measurement_theta_min       2.7 
_cell_measurement_theta_max       33.6 
 
_exptl_crystal_description        block 
_exptl_crystal_colour             black 
_exptl_crystal_size_max           0.36 
_exptl_crystal_size_mid           0.36 
_exptl_crystal_size_min           0.16 
_exptl_crystal_density_meas       ? 
_exptl_crystal_density_diffrn     1.659 
_exptl_crystal_density_method     'not measured' 
_exptl_crystal_F_000              3816 
_exptl_absorpt_coefficient_mu     1.092 
_exptl_absorpt_correction_type    multi-scan 
_exptl_absorpt_correction_T_min   0.695
_exptl_absorpt_correction_T_max   0.846
_exptl_absorpt_process_details    'SADABS (Sheldrick, 2009)' 
 
_exptl_special_details 
; 
 ? 
; 
 
_diffrn_ambient_temperature       90(2) 
_diffrn_radiation_wavelength      0.71073 
_diffrn_radiation_type            MoK\a 
_diffrn_radiation_source          'fine-focus sealed tube' 
_diffrn_radiation_monochromator   graphite 
_diffrn_measurement_device_type   'Bruker SMART ApexII' 
_diffrn_measurement_method        '\w and \f'
_diffrn_detector_area_resol_mean  8.3 
_diffrn_reflns_number             98570 
_diffrn_reflns_av_R_equivalents   0.0245 
_diffrn_reflns_av_sigmaI/netI     0.0186 
_diffrn_reflns_limit_h_min        -38 
_diffrn_reflns_limit_h_max        37 
_diffrn_reflns_limit_k_min        -22 
_diffrn_reflns_limit_k_max        21 
_diffrn_reflns_limit_l_min        -29 
_diffrn_reflns_limit_l_max        29 
_diffrn_reflns_theta_min          1.61 
_diffrn_reflns_theta_max          32.58 
_reflns_number_total              14174 
_reflns_number_gt                 11674 
_reflns_threshold_expression      I>2\s(I) 
 
_computing_data_collection        'Apex2 (Bruker, 2010)' 
_computing_cell_refinement        'SAINT (Bruker, 2010)' 
_computing_data_reduction         'SAINT (Bruker, 2010)' 
_computing_structure_solution     'SHELXS97 (Sheldrick, 2008)' 
_computing_structure_refinement   'SHELXL97 (Sheldrick, 2008)' 
_computing_molecular_graphics     ? 
_computing_publication_material   'SHELXL97 (Sheldrick, 2008)'  
 
_refine_special_details 
; 
 Refinement of F^2^ against ALL reflections.  The weighted R-factor wR and 
 goodness of fit S are based on F^2^, conventional R-factors R are based 
 on F, with F set to zero for negative F^2^. The threshold expression of 
 F^2^ > 2sigma(F^2^) is used only for calculating R-factors(gt) etc. and is 
 not relevant to the choice of reflections for refinement.  R-factors based 
 on F^2^ are statistically about twice as large as those based on F, and R- 
 factors based on ALL data will be even larger.
 The structure has two orientations for the C82 ball. Both are disordered
 with respect to the crystallographic mirror plane. The major orientation
 was refined with anisotropic thermal parameters and SADI 0.01 commands
 that equate the C-C bonds that are related by the point symmetry (C2)
 of the molecule. In the major orientation, 
 Of the 82 C atoms, 80 were refined as PART -1 and with an occupancy
 of 0.447 while C65 was located on the mirror plane and C8 was too
 close to it's symmetry-related atom (C72). These two were refined in
 PART 0. The minor orientation of C82 was refined as a rigid group. The
 group was based on the geometry of the major orientation. It was refined
 with AFIX 6, isotropic thermal parameters and a SIMU command. 
 One of the benzene solvates is disordered and was refined in
 two orientations. There are six Sm positions with occupancies ranging
 from 0.25 to 0.01; the occupancy sum is 0.50000. The occupancies were
 initially refined and subsequently fixed. Sm1, Sm2, Sm3 and Sm4 were
 refined with anisotropic thermal parameters.
; 
 
_refine_ls_structure_factor_coef  Fsqd  
_refine_ls_matrix_type            full 
_refine_ls_weighting_scheme       calc  
_refine_ls_weighting_details 
 'calc w=1/[\s^2^(Fo^2^)+(0.1136P)^2^+20.9782P] where P=(Fo^2^+2Fc^2^)/3' 
_atom_sites_solution_primary      direct 
_atom_sites_solution_secondary    difmap 
_atom_sites_solution_hydrogens    geom 
_refine_ls_hydrogen_treatment     constr
_refine_ls_extinction_method      none 
_refine_ls_extinction_coef        ? 
_refine_ls_number_reflns          14174 
_refine_ls_number_parameters      1098 
_refine_ls_number_restraints      2752 
_refine_ls_R_factor_all           0.0821 
_refine_ls_R_factor_gt            0.0678 
_refine_ls_wR_factor_ref          0.2036 
_refine_ls_wR_factor_gt           0.1875 
_refine_ls_goodness_of_fit_ref    1.032 
_refine_ls_restrained_S_all       0.976 
_refine_ls_shift/su_max           0.001 
_refine_ls_shift/su_mean          0.000 
 
loop_ 
 _atom_site_label 
 _atom_site_type_symbol 
 _atom_site_fract_x 
 _atom_site_fract_y 
 _atom_site_fract_z 
 _atom_site_U_iso_or_equiv 
 _atom_site_adp_type 
 _atom_site_occupancy 
 _atom_site_symmetry_multiplicity 
 _atom_site_calc_flag 
 _atom_site_refinement_flags 
 _atom_site_disorder_assembly 
 _atom_site_disorder_group 
Sm1 Sm 0.67608(2) 0.59738(3) 0.20664(3) 0.03685(12) Uani 0.25 1 d P . . 
Sm2 Sm 0.75283(13) 0.4616(3) 0.14808(13) 0.0458(8) Uani 0.09 1 d PU . . 
Sm3 Sm 0.72214(12) 0.4887(4) 0.10861(13) 0.0528(14) Uani 0.06 1 d PU . . 
Sm4 Sm 0.7442(2) 0.4781(4) 0.12963(19) 0.0380(18) Uani 0.06 1 d PU . . 
Sm5 Sm 0.7514(3) 0.5000 0.1405(3) 0.0224(13) Uiso 0.06 2 d SPU . . 
Sm6 Sm 0.6758(3) 0.4340(6) 0.2376(4) 0.0159(13) Uiso 0.01 1 d P . . 
C1_1 C 0.7074(6) 0.7580(10) 0.2644(7) 0.078(4) Uani 0.45 1 d PDU . -1 
C2_1 C 0.6727(4) 0.7175(5) 0.3089(4) 0.0581(19) Uani 0.45 1 d PDU . -1 
C3_1 C 0.6201(5) 0.7090(7) 0.2736(4) 0.0425(19) Uani 0.45 1 d PDU . -1 
C4_1 C 0.6095(4) 0.7285(5) 0.2016(5) 0.0540(19) Uani 0.45 1 d PDU . -1 
C5_1 C 0.6485(3) 0.7602(5) 0.1575(4) 0.0608(19) Uani 0.45 1 d PDU . -1 
C6_1 C 0.7003(4) 0.7761(5) 0.1919(6) 0.064(3) Uani 0.45 1 d PDU . -1 
C7_1 C 0.7505(3) 0.7545(4) 0.1625(4) 0.0463(15) Uani 0.45 1 d PDU . -1 
C9_1 C 0.7642(4) 0.7316(6) 0.2739(4) 0.0398(10) Uani 0.45 1 d PDU . -1 
C10_1 C 0.7841(3) 0.6645(6) 0.3278(5) 0.056(2) Uani 0.45 1 d PDU . -1 
C11_1 C 0.7448(4) 0.6308(6) 0.3730(4) 0.0465(17) Uani 0.45 1 d PDU . -1 
C12_1 C 0.6919(4) 0.6593(5) 0.3572(4) 0.0492(16) Uani 0.45 1 d PDU . -1 
C13_1 C 0.6577(3) 0.5820(6) 0.3714(4) 0.053(2) Uani 0.45 1 d PDU . -1 
C14_1 C 0.6132(3) 0.5589(6) 0.3331(4) 0.053(2) Uani 0.45 1 d PDU . -1 
C15_1 C 0.5914(3) 0.6246(5) 0.2844(3) 0.058(2) Uani 0.45 1 d PDU . -1 
C16_1 C 0.5578(2) 0.5963(5) 0.2226(3) 0.0396(13) Uani 0.45 1 d PDU . -1 
C17_1 C 0.5659(5) 0.6689(7) 0.1727(5) 0.0383(19) Uani 0.45 1 d PDU . -1 
C18_1 C 0.5692(3) 0.6343(5) 0.1018(4) 0.0571(19) Uani 0.45 1 d PDU . -1 
C19_1 C 0.6096(4) 0.6718(7) 0.0600(5) 0.051(2) Uani 0.45 1 d PDU . -1 
C20_1 C 0.6486(5) 0.7309(7) 0.0922(4) 0.062(3) Uani 0.45 1 d PDU . -1 
C21_1 C 0.7007(4) 0.7167(5) 0.0605(4) 0.057(2) Uani 0.45 1 d PDU . -1 
C22_1 C 0.7494(4) 0.7176(5) 0.0931(4) 0.061(2) Uani 0.45 1 d PDU . -1 
C23_1 C 0.7912(4) 0.6565(8) 0.0777(5) 0.0580(14) Uani 0.45 1 d PDU . -1 
C24_1 C 0.8311(3) 0.6250(7) 0.1284(4) 0.060(2) Uani 0.45 1 d PDU . -1 
C25_1 C 0.8286(4) 0.6591(8) 0.1962(5) 0.053(2) Uani 0.45 1 d PDU . -1 
C26_1 C 0.8501(3) 0.6061(7) 0.2514(4) 0.059(2) Uani 0.45 1 d PDU . -1 
C27_1 C 0.8263(3) 0.6054(6) 0.3187(4) 0.058(2) Uani 0.45 1 d PDU . -1 
C28_1 C 0.8270(3) 0.5182(8) 0.3474(4) 0.066(3) Uani 0.45 1 d PDU . -1 
C29_1 C 0.7878(3) 0.4828(5) 0.3814(3) 0.058(3) Uani 0.45 1 d PDU . -1 
C30_1 C 0.7468(3) 0.5403(5) 0.3977(3) 0.0565(18) Uani 0.45 1 d PDU . -1 
C31_1 C 0.6929(3) 0.5111(9) 0.3991(3) 0.062(3) Uani 0.45 1 d PDU . -1 
C32_1 C 0.6797(4) 0.4250(5) 0.3883(4) 0.0504(17) Uani 0.45 1 d PDU . -1 
C33_1 C 0.6311(4) 0.4011(6) 0.3510(4) 0.0532(17) Uani 0.45 1 d PDU . -1 
C34_1 C 0.5956(3) 0.4705(5) 0.3173(4) 0.0504(19) Uani 0.45 1 d PDU . -1 
C35_1 C 0.5646(3) 0.4417(5) 0.2569(4) 0.0500(16) Uani 0.45 1 d PDU . -1 
C36_1 C 0.5459(2) 0.5111(10) 0.2086(3) 0.052(3) Uani 0.45 1 d PDU . -1 
C37_1 C 0.53682(18) 0.4870(8) 0.1391(3) 0.045(3) Uani 0.45 1 d PDU . -1 
C38_1 C 0.5523(3) 0.5492(5) 0.0858(4) 0.0539(17) Uani 0.45 1 d PDU . -1 
C39_1 C 0.5765(3) 0.5044(11) 0.0316(3) 0.0620(19) Uani 0.45 1 d PDU . -1 
C40_1 C 0.6194(3) 0.5273(4) -0.0008(3) 0.0553(19) Uani 0.45 1 d PDU . -1 
C41_1 C 0.6344(4) 0.6186(6) 0.0108(4) 0.052(2) Uani 0.45 1 d PDU . -1 
C42_1 C 0.6887(4) 0.6476(5) 0.0095(3) 0.0468(18) Uani 0.45 1 d PDU . -1 
C43_1 C 0.7251(4) 0.5879(5) -0.0074(3) 0.059(2) Uani 0.45 1 d PDU . -1 
C44_1 C 0.7791(4) 0.5896(7) 0.0234(4) 0.069(3) Uani 0.45 1 d PDU . -1 
C45_1 C 0.7987(4) 0.5105(15) 0.0272(4) 0.088(4) Uani 0.45 1 d PDU . -1 
C46_1 C 0.8336(4) 0.4737(7) 0.0743(7) 0.083(3) Uani 0.45 1 d PDU . -1 
C47_1 C 0.8525(3) 0.5439(7) 0.1218(6) 0.075(3) Uani 0.45 1 d PDU . -1 
C48_1 C 0.8703(3) 0.4873(10) 0.1780(6) 0.079(4) Uani 0.45 1 d PDU . -1 
C49_1 C 0.8683(2) 0.5244(6) 0.2391(5) 0.064(3) Uani 0.45 1 d PDU . -1 
C50_1 C 0.8556(3) 0.4666(6) 0.2974(5) 0.083(3) Uani 0.45 1 d PDU . -1 
C51_1 C 0.8426(4) 0.3826(8) 0.2842(7) 0.080(3) Uani 0.45 1 d PDU . -1 
C52_1 C 0.8021(3) 0.3461(6) 0.3230(6) 0.056(2) Uani 0.45 1 d PDU . -1 
C53_1 C 0.7726(3) 0.3898(5) 0.3698(4) 0.0489(16) Uani 0.45 1 d PDU . -1 
C54_1 C 0.7205(4) 0.3651(7) 0.3732(4) 0.0497(19) Uani 0.45 1 d PDU . -1 
C55_1 C 0.6968(4) 0.2979(6) 0.3284(4) 0.0548(19) Uani 0.45 1 d PDU . -1 
C56_1 C 0.6380(3) 0.3286(8) 0.3205(4) 0.067(2) Uani 0.45 1 d PDU . -1 
C57_1 C 0.6124(6) 0.3034(10) 0.2609(7) 0.075(4) Uani 0.45 1 d PDU . -1 
C58_1 C 0.5683(3) 0.3594(6) 0.2324(4) 0.0561(19) Uani 0.45 1 d PDU . -1 
C59_1 C 0.5666(7) 0.3455(9) 0.1592(6) 0.055(3) Uani 0.45 1 d PDU . -1 
C60_1 C 0.5467(2) 0.4055(5) 0.1148(3) 0.0452(14) Uani 0.45 1 d PDU . -1 
C61_1 C 0.5725(3) 0.4086(5) 0.0502(3) 0.0477(15) Uani 0.45 1 d PDU . -1 
C62_1 C 0.6118(5) 0.3504(8) 0.0391(6) 0.057(3) Uani 0.45 1 d PDU . -1 
C63_1 C 0.6596(5) 0.3752(7) 0.0084(5) 0.058(3) Uani 0.45 1 d PDU . -1 
C64_1 C 0.6620(3) 0.4654(5) -0.0150(3) 0.061(2) Uani 0.45 1 d PDU . -1 
C66_1 C 0.7555(5) 0.4414(6) 0.0030(4) 0.062(2) Uani 0.45 1 d PDU . -1 
C67_1 C 0.7527(5) 0.3605(7) 0.0353(5) 0.091(3) Uani 0.45 1 d PDU . -1 
C68_1 C 0.7870(4) 0.3263(8) 0.0916(5) 0.0580(14) Uani 0.45 1 d PDU . -1 
C69_1 C 0.8281(5) 0.3859(9) 0.0964(7) 0.103(4) Uani 0.45 1 d PDU . -1 
C70_1 C 0.8565(4) 0.4025(7) 0.1635(6) 0.079(3) Uani 0.45 1 d PDU . -1 
C71_1 C 0.8421(4) 0.3447(9) 0.2128(7) 0.069(4) Uani 0.45 1 d PDU . -1 
C73_1 C 0.7744(4) 0.2878(6) 0.2802(4) 0.0398(10) Uani 0.45 1 d PDU . -1 
C74_1 C 0.7193(4) 0.2591(8) 0.2751(5) 0.046(2) Uani 0.45 1 d PDU . -1 
C75_1 C 0.6878(4) 0.2386(7) 0.2120(5) 0.071(3) Uani 0.45 1 d PDU . -1 
C76_1 C 0.6349(4) 0.2514(5) 0.2123(4) 0.055(2) Uani 0.45 1 d PDU . -1 
C77_1 C 0.6006(3) 0.2778(5) 0.1515(3) 0.0490(15) Uani 0.45 1 d PDU . -1 
C78_1 C 0.6247(4) 0.2796(6) 0.0922(5) 0.0465(19) Uani 0.45 1 d PDU . -1 
C79_1 C 0.6859(4) 0.2624(5) 0.0947(4) 0.0557(19) Uani 0.45 1 d PDU . -1 
C80_1 C 0.7003(4) 0.3212(7) 0.0377(6) 0.076(3) Uani 0.45 1 d PDU . -1 
C81_1 C 0.7163(4) 0.2473(6) 0.1496(5) 0.069(2) Uani 0.45 1 d PDU . -1 
C82_1 C 0.7724(4) 0.2765(5) 0.1502(4) 0.071(3) Uani 0.45 1 d PDU . -1 
C8_1 C 0.7932(2) 0.7181(3) 0.2120(2) 0.0823(16) Uani 0.89 1 d PDU . . 
C65_1 C 0.7121(3) 0.5000 -0.0200(3) 0.0727(19) Uani 0.89 2 d SPDU . . 
C1_2 C 0.5698(5) 0.5152(10) 0.0515(7) 0.059(9) Uiso 0.05 1 d PGU . -2 
C2_2 C 0.6052(5) 0.4614(10) 0.0141(6) 0.061(9) Uiso 0.05 1 d PGU . -2 
C3_2 C 0.6448(6) 0.5187(10) -0.0119(5) 0.027(8) Uiso 0.05 1 d PGU . -2 
C4_2 C 0.6499(6) 0.6121(9) 0.0046(5) 0.029(9) Uiso 0.05 1 d PGU . -2 
C5_2 C 0.6173(5) 0.6612(9) 0.0499(6) 0.043(10) Uiso 0.05 1 d PGU . -2 
C6_2 C 0.5756(4) 0.6066(9) 0.0734(7) 0.039(9) Uiso 0.05 1 d PGU . -2 
C7_2 C 0.5566(3) 0.6119(9) 0.1420(8) 0.032(7) Uiso 0.05 1 d PGU . -2 
C8_2 C 0.5414(3) 0.5253(9) 0.1712(8) 0.032(7) Uiso 0.05 1 d PGU . -2 
C9_2 C 0.5521(4) 0.4621(9) 0.1164(8) 0.055(9) Uiso 0.05 1 d PGU . -2 
C10_2 C 0.5592(5) 0.3691(9) 0.1307(8) 0.038(9) Uiso 0.05 1 d PGU . -2 
C11_2 C 0.5928(6) 0.3249(9) 0.0849(8) 0.055(8) Uiso 0.05 1 d PGU . -2 
C12_2 C 0.6143(6) 0.3748(9) 0.0333(7) 0.066(11) Uiso 0.05 1 d PGU . -2 
C13_2 C 0.6684(6) 0.3444(9) 0.0256(6) 0.070(11) Uiso 0.05 1 d PGU . -2 
C14_2 C 0.7119(6) 0.3951(9) 0.0146(6) 0.079(10) Uiso 0.05 1 d PGU . -2 
C15_2 C 0.7000(6) 0.4853(10) -0.0085(5) 0.076(10) Uiso 0.05 1 d PGU . -2 
C16_2 C 0.7398(6) 0.5570(10) 0.0030(5) 0.073(10) Uiso 0.05 1 d PGU . -2 
C17_2 C 0.7106(6) 0.6437(9) 0.0058(5) 0.030(8) Uiso 0.05 1 d PGU . -2 
C18_2 C 0.7299(5) 0.7043(8) 0.0580(5) 0.030 Uiso 0.05 1 d PGU . -2 
C19_2 C 0.6931(5) 0.7507(7) 0.0993(6) 0.055(10) Uiso 0.05 1 d PGU . -2 
C20_2 C 0.6387(5) 0.7233(7) 0.0945(6) 0.059(11) Uiso 0.05 1 d PGU . -2 
C21_2 C 0.6154(4) 0.7331(7) 0.1602(7) 0.043(9) Uiso 0.05 1 d PGU . -2 
C22_2 C 0.5823(4) 0.6773(8) 0.1886(7) 0.061(11) Uiso 0.05 1 d PGU . -2 
C23_2 C 0.5887(4) 0.6461(8) 0.2544(7) 0.058(10) Uiso 0.05 1 d PGU . -2 
C24_2 C 0.5699(4) 0.5658(9) 0.2865(7) 0.055(9) Uiso 0.05 1 d PGU . -2 
C25_2 C 0.5490(4) 0.5053(9) 0.2368(8) 0.079(10) Uiso 0.05 1 d PGU . -2 
C26_2 C 0.5536(5) 0.4122(9) 0.2515(8) 0.068(12) Uiso 0.05 1 d PGU . -2 
C27_2 C 0.5612(5) 0.3443(9) 0.1978(9) 0.055(11) Uiso 0.05 1 d PGU . -2 
C28_2 C 0.5972(6) 0.2767(8) 0.2185(9) 0.058(9) Uiso 0.05 1 d PGU . -2 
C29_2 C 0.6336(6) 0.2392(7) 0.1820(9) 0.069(11) Uiso 0.05 1 d PGU . -2 
C30_2 C 0.6300(6) 0.2597(7) 0.1127(8) 0.042(9) Uiso 0.05 1 d PGU . -2 
C31_2 C 0.6753(6) 0.2693(8) 0.0737(8) 0.057(10) Uiso 0.05 1 d PGU . -2 
C32_2 C 0.7256(6) 0.2514(7) 0.1038(8) 0.060(9) Uiso 0.05 1 d PGU . -2 
C33_2 C 0.7715(6) 0.3030(8) 0.0890(7) 0.065(11) Uiso 0.05 1 d PGU . -2 
C34_2 C 0.7637(6) 0.3846(9) 0.0428(6) 0.089(11) Uiso 0.05 1 d PGU . -2 
C35_2 C 0.8037(5) 0.4531(9) 0.0576(6) 0.091(10) Uiso 0.05 1 d PGU . -2 
C36_2 C 0.7881(5) 0.5415(9) 0.0353(5) 0.087(11) Uiso 0.05 1 d PGU . -2 
C37_2 C 0.8126(5) 0.6152(9) 0.0719(6) 0.063(10) Uiso 0.05 1 d PGU . -2 
C38_2 C 0.7805(5) 0.6948(8) 0.0862(6) 0.039(9) Uiso 0.05 1 d PGU . -2 
C39_2 C 0.7923(4) 0.7288(7) 0.1521(6) 0.049(9) Uiso 0.05 1 d PGU . -2 
C40_2 C 0.7598(4) 0.7569(6) 0.1981(6) 0.006(3) Uiso 0.05 1 d PGU . -2 
C41_2 C 0.7075(4) 0.7756(6) 0.1683(6) 0.037(9) Uiso 0.05 1 d PGU . -2 
C42_2 C 0.6604(4) 0.7676(6) 0.2045(7) 0.029(7) Uiso 0.05 1 d PGU . -2 
C43_2 C 0.6676(5) 0.7477(7) 0.2730(6) 0.042(8) Uiso 0.05 1 d PGU . -2 
C44_2 C 0.6285(5) 0.6925(8) 0.3048(6) 0.051(10) Uiso 0.05 1 d PGU . -2 
C45_2 C 0.6536(5) 0.6473(9) 0.3549(6) 0.056(9) Uiso 0.05 1 d PGU . -2 
C46_2 C 0.6438(6) 0.5630(10) 0.3793(5) 0.085(11) Uiso 0.05 1 d PGU . -2 
C47_2 C 0.5951(5) 0.5323(10) 0.3428(7) 0.066(11) Uiso 0.05 1 d PGU . -2 
C48_2 C 0.6044(6) 0.4431(10) 0.3554(7) 0.081(12) Uiso 0.05 1 d PGU . -2 
C49_2 C 0.5813(6) 0.3837(10) 0.3079(8) 0.071(9) Uiso 0.05 1 d PGU . -2 
C50_2 C 0.6086(6) 0.3001(8) 0.2917(8) 0.073(12) Uiso 0.05 1 d PGU . -2 
C51_2 C 0.6577(7) 0.2875(8) 0.3224(8) 0.082(11) Uiso 0.05 1 d PGU . -2 
C52_2 C 0.6967(7) 0.2489(7) 0.2852(8) 0.046(9) Uiso 0.05 1 d PGU . -2 
C53_2 C 0.6865(6) 0.2215(6) 0.2150(8) 0.058(10) Uiso 0.05 1 d PGU . -2 
C54_2 C 0.7277(6) 0.2271(6) 0.1731(8) 0.074(11) Uiso 0.05 1 d PGU . -2 
C55_2 C 0.7799(6) 0.2601(7) 0.2014(8) 0.071(12) Uiso 0.05 1 d PGU . -2 
C56_2 C 0.8027(5) 0.3048(8) 0.1390(8) 0.039(7) Uiso 0.05 1 d PGU . -2 
C57_2 C 0.8380(5) 0.3726(8) 0.1575(8) 0.077(11) Uiso 0.05 1 d PGU . -2 
C58_2 C 0.8416(5) 0.4442(9) 0.1079(7) 0.081(9) Uiso 0.05 1 d PGU . -2 
C59_2 C 0.8556(4) 0.5185(9) 0.1478(7) 0.028(7) Uiso 0.05 1 d PGU . -2 
C60_2 C 0.8467(4) 0.6063(9) 0.1275(7) 0.063(11) Uiso 0.05 1 d PGU . -2 
C61_2 C 0.8367(4) 0.6702(8) 0.1806(7) 0.062(10) Uiso 0.05 1 d PGU . -2 
C62_2 C 0.8409(4) 0.6440(8) 0.2476(7) 0.049(10) Uiso 0.05 1 d PGU . -2 
C63_2 C 0.8044(4) 0.6687(8) 0.2946(6) 0.049(10) Uiso 0.05 1 d PGU . -2 
C64_2 C 0.7629(4) 0.7318(7) 0.2704(6) 0.048(10) Uiso 0.05 1 d PGU . -2 
C65_2 C 0.7173(5) 0.7314(7) 0.3041(6) 0.001(3) Uiso 0.05 1 d PGU . -2 
C66_2 C 0.7145(5) 0.6624(8) 0.3580(5) 0.029(8) Uiso 0.05 1 d PGU . -2 
C67_2 C 0.7507(5) 0.5946(9) 0.3720(4) 0.063(10) Uiso 0.05 1 d PGU . -2 
C68_2 C 0.7341(6) 0.5106(9) 0.4000(4) 0.048(9) Uiso 0.05 1 d PGU . -2 
C69_2 C 0.6836(6) 0.5032(10) 0.3997(5) 0.077(11) Uiso 0.11 2 d SPGU . -2 
C70_2 C 0.6524(6) 0.4241(10) 0.3856(6) 0.066(11) Uiso 0.05 1 d PGU . -2 
C71_2 C 0.6839(7) 0.3540(9) 0.3731(6) 0.052(9) Uiso 0.05 1 d PGU . -2 
C72_2 C 0.7418(6) 0.3478(8) 0.3549(6) 0.054(9) Uiso 0.05 1 d PGU . -2 
C73_2 C 0.7504(6) 0.2748(7) 0.3086(8) 0.071(10) Uiso 0.05 1 d PGU . -2 
C74_2 C 0.7896(6) 0.2953(7) 0.2649(8) 0.047(10) Uiso 0.05 1 d PGU . -2 
C75_2 C 0.8285(5) 0.3668(8) 0.2729(7) 0.075(11) Uiso 0.05 1 d PGU . -2 
C76_2 C 0.8524(4) 0.3984(8) 0.2236(8) 0.068(10) Uiso 0.05 1 d PGU . -2 
C77_2 C 0.8680(4) 0.4904(9) 0.2120(8) 0.036(8) Uiso 0.05 1 d PGU . -2 
C78_2 C 0.8589(4) 0.5486(9) 0.2618(7) 0.048(9) Uiso 0.05 1 d PGU . -2 
C79_2 C 0.8301(5) 0.5157(9) 0.3234(6) 0.061(9) Uiso 0.05 1 d PGU . -2 
C80_2 C 0.7993(5) 0.5941(8) 0.3418(5) 0.059(8) Uiso 0.05 1 d PGU . -2 
C81_2 C 0.8109(5) 0.4361(8) 0.3318(6) 0.068(8) Uiso 0.05 1 d PGU . -2 
C82_2 C 0.7641(6) 0.4242(9) 0.3690(5) 0.069(10) Uiso 0.05 1 d PGU . -2 
Ni1 Ni 0.519700(11) 0.5000 0.417789(15) 0.01411(8) Uani 1 2 d S . . 
N1 N 0.52079(5) 0.36953(10) 0.41646(7) 0.0166(2) Uani 1 1 d U . . 
N2 N 0.46516(8) 0.5000 0.34253(10) 0.0168(3) Uani 1 2 d SU . . 
N3 N 0.57640(8) 0.5000 0.49044(10) 0.0161(3) Uani 1 2 d SU . . 
C83 C 0.55289(6) 0.31360(11) 0.45634(9) 0.0177(3) Uani 1 1 d U . . 
C84 C 0.54312(7) 0.22173(11) 0.43886(10) 0.0211(3) Uani 1 1 d U . . 
C85 C 0.50439(7) 0.22144(12) 0.38729(10) 0.0214(3) Uani 1 1 d U . . 
C86 C 0.49075(6) 0.31353(11) 0.37437(9) 0.0183(3) Uani 1 1 d U . . 
C87 C 0.45312(7) 0.34025(11) 0.32463(9) 0.0192(3) Uani 1 1 d U . . 
H87 H 0.4337 0.2958 0.2995 0.023 Uiso 1 1 calc R . . 
C88 C 0.44216(6) 0.42778(11) 0.30938(8) 0.0180(3) Uani 1 1 d U . . 
C89 C 0.40528(7) 0.45496(12) 0.25377(9) 0.0207(3) Uani 1 1 d U . . 
C90 C 0.64389(6) 0.45467(12) 0.56985(8) 0.0184(3) Uani 1 1 d U . . 
C91 C 0.60191(6) 0.42789(11) 0.52077(8) 0.0168(3) Uani 1 1 d U . . 
C92 C 0.59044(6) 0.34054(11) 0.50578(9) 0.0180(3) Uani 1 1 d U . . 
H92 H 0.6097 0.2961 0.5312 0.022 Uiso 1 1 calc R . . 
C93 C 0.57253(8) 0.14452(13) 0.47197(11) 0.0273(4) Uani 1 1 d U . . 
H93A H 0.5519 0.0896 0.4624 0.033 Uiso 1 1 calc R . . 
H93B H 0.5755 0.1535 0.5216 0.033 Uiso 1 1 calc R . . 
C94 C 0.62818(9) 0.13275(15) 0.44737(14) 0.0356(5) Uani 1 1 d U . . 
H94A H 0.6463 0.0842 0.4725 0.053 Uiso 1 1 calc R . . 
H94B H 0.6483 0.1878 0.4550 0.053 Uiso 1 1 calc R . . 
H94C H 0.6254 0.1188 0.3989 0.053 Uiso 1 1 calc R . . 
C95 C 0.48071(8) 0.14440(13) 0.34773(11) 0.0278(4) Uani 1 1 d U . . 
H95A H 0.4419 0.1526 0.3414 0.033 Uiso 1 1 calc R . . 
H95B H 0.4876 0.0893 0.3741 0.033 Uiso 1 1 calc R . . 
C96 C 0.50290(10) 0.13383(16) 0.27819(13) 0.0361(5) Uani 1 1 d U . . 
H96A H 0.4867 0.0820 0.2551 0.054 Uiso 1 1 calc R . . 
H96B H 0.5413 0.1256 0.2841 0.054 Uiso 1 1 calc R . . 
H96C H 0.4949 0.1871 0.2510 0.054 Uiso 1 1 calc R . . 
C97 C 0.37621(8) 0.39234(14) 0.20540(10) 0.0262(4) Uani 1 1 d U . . 
H97A H 0.3468 0.4246 0.1805 0.031 Uiso 1 1 calc R . . 
H97B H 0.3606 0.3441 0.2315 0.031 Uiso 1 1 calc R . . 
C98 C 0.41160(9) 0.35147(16) 0.15425(11) 0.0317(4) Uani 1 1 d U . . 
H98A H 0.3904 0.3127 0.1232 0.047 Uiso 1 1 calc R . . 
H98B H 0.4397 0.3167 0.1784 0.047 Uiso 1 1 calc R . . 
H98C H 0.4274 0.3988 0.1284 0.047 Uiso 1 1 calc R . . 
C99 C 0.68166(7) 0.39278(13) 0.60765(9) 0.0229(3) Uani 1 1 d U . . 
H99A H 0.6621 0.3400 0.6220 0.027 Uiso 1 1 calc R . . 
H99B H 0.6972 0.4228 0.6490 0.027 Uiso 1 1 calc R . . 
C100 C 0.72622(8) 0.36304(17) 0.56463(11) 0.0329(4) Uani 1 1 d U . . 
H10A H 0.7509 0.3250 0.5918 0.049 Uiso 1 1 calc R . . 
H10B H 0.7451 0.4152 0.5493 0.049 Uiso 1 1 calc R . . 
H10C H 0.7112 0.3298 0.5252 0.049 Uiso 1 1 calc R . . 
C101 C 0.6568(2) 0.0000 0.15075(19) 0.0623(14) Uani 1 2 d SU . . 
H101 H 0.6442 0.0000 0.1044 0.075 Uiso 1 2 calc SR . . 
C102 C 0.71085(17) 0.0000 0.16832(17) 0.0477(9) Uani 1 2 d SU . . 
H102 H 0.7352 0.0000 0.1340 0.057 Uiso 1 2 calc SR . . 
C103 C 0.72920(14) 0.0000 0.23596(17) 0.0367(7) Uani 1 2 d SU . . 
H103 H 0.7662 0.0000 0.2482 0.044 Uiso 1 2 calc SR . . 
C104 C 0.69350(13) 0.0000 0.28577(15) 0.0326(6) Uani 1 2 d SU . . 
H104 H 0.7060 0.0000 0.3322 0.039 Uiso 1 2 calc SR . . 
C105 C 0.63963(13) 0.0000 0.26785(16) 0.0356(6) Uani 1 2 d SU . . 
H105 H 0.6152 0.0000 0.3020 0.043 Uiso 1 2 calc SR . . 
C106 C 0.62134(16) 0.0000 0.2003(2) 0.0522(11) Uani 1 2 d SU . . 
H106 H 0.5844 0.0000 0.1880 0.063 Uiso 1 2 calc SR . . 
C107 C 0.5542(3) 0.1283(6) -0.0006(5) 0.0604(18) Uiso 0.50 1 d PU . 1 
H107 H 0.5917 0.1251 0.0011 0.072 Uiso 0.50 1 calc PR . 1 
C108 C 0.5293(3) 0.1290(5) 0.0565(4) 0.0507(14) Uiso 0.50 1 d PU A 1 
H108 H 0.5509 0.1271 0.0978 0.061 Uiso 0.50 1 calc PR A 1 
C109 C 0.4746(4) 0.1321(7) 0.0613(6) 0.071(2) Uiso 0.50 1 d PU . 1 
H109 H 0.4588 0.1366 0.1033 0.085 Uiso 0.50 1 calc PR . 1 
C110 C 0.5258(3) 0.1115(7) -0.0383(3) 0.043(2) Uiso 0.25 1 d PGU B -2 
H110 H 0.5427 0.1004 -0.0787 0.051 Uiso 0.25 1 d PG B -2 
C111 C 0.5539(2) 0.1032(6) 0.0243(4) 0.044(2) Uiso 0.25 1 d PGU B -2 
H111 H 0.5902 0.0864 0.0268 0.053 Uiso 0.25 1 d PG B -2 
C112 C 0.5291(3) 0.1195(6) 0.0834(3) 0.041(2) Uiso 0.25 1 d PGU B -2 
H112 H 0.5484 0.1137 0.1262 0.049 Uiso 0.25 1 d PG B -2 
C113 C 0.4761(3) 0.1441(6) 0.0799(4) 0.040(2) Uiso 0.25 1 d PGU B -2 
H113 H 0.4592 0.1552 0.1203 0.048 Uiso 0.25 1 d PG B -2 
C114 C 0.4479(2) 0.1524(7) 0.0173(4) 0.039(2) Uiso 0.25 1 d PGU B -2 
H114 H 0.4117 0.1692 0.0149 0.047 Uiso 0.25 1 d PG B -2 
C115 C 0.4728(3) 0.1362(8) -0.0418(3) 0.22(2) Uiso 0.25 1 d PGU B -2 
H115 H 0.4535 0.1419 -0.0846 0.266 Uiso 0.25 1 d PG B -2 
 
loop_ 
 _atom_site_aniso_label 
 _atom_site_aniso_U_11 
 _atom_site_aniso_U_22 
 _atom_site_aniso_U_33 
 _atom_site_aniso_U_23 
 _atom_site_aniso_U_13 
 _atom_site_aniso_U_12 
Sm1 0.0377(2) 0.0300(2) 0.0439(3) -0.0033(2) 0.01102(19) 0.00992(18) 
Sm2 0.0409(11) 0.0569(16) 0.0436(15) 0.0027(12) 0.0300(11) 0.0254(10) 
Sm3 0.0514(13) 0.085(4) 0.0247(10) -0.041(2) 0.0212(9) -0.034(2) 
Sm4 0.044(2) 0.052(4) 0.0215(15) -0.0315(19) 0.0239(15) -0.033(2) 
C1_1 0.112(10) 0.035(5) 0.087(8) -0.012(5) 0.008(7) -0.001(6) 
C2_1 0.070(5) 0.047(4) 0.058(4) -0.019(3) 0.009(4) 0.019(4) 
C3_1 0.067(5) 0.028(3) 0.034(3) -0.016(3) 0.012(3) 0.020(3) 
C4_1 0.060(5) 0.036(4) 0.069(5) 0.001(3) 0.017(4) 0.019(3) 
C5_1 0.069(5) 0.039(3) 0.075(5) 0.025(3) 0.006(4) 0.002(3) 
C6_1 0.072(5) 0.015(3) 0.106(8) -0.007(4) 0.024(5) -0.006(3) 
C7_1 0.060(4) 0.019(2) 0.061(4) -0.009(2) 0.015(3) -0.010(3) 
C9_1 0.057(4) 0.013(4) 0.048(2) 0.0005(14) -0.003(2) 0.0015(14) 
C10_1 0.031(4) 0.052(4) 0.081(5) -0.038(4) -0.026(4) 0.007(4) 
C11_1 0.050(4) 0.058(4) 0.029(3) -0.016(3) -0.015(4) -0.001(4) 
C12_1 0.075(6) 0.040(3) 0.032(3) -0.017(3) -0.001(3) 0.010(3) 
C13_1 0.042(4) 0.086(6) 0.031(3) -0.019(3) 0.007(3) 0.026(4) 
C14_1 0.065(5) 0.058(5) 0.042(4) -0.001(3) 0.036(4) -0.009(4) 
C15_1 0.062(4) 0.085(5) 0.030(2) 0.010(3) 0.023(2) 0.055(4) 
C16_1 0.031(3) 0.044(3) 0.046(3) 0.008(3) 0.020(2) 0.012(3) 
C17_1 0.038(4) 0.038(4) 0.041(4) 0.004(3) 0.015(3) 0.021(3) 
C18_1 0.039(3) 0.079(5) 0.053(4) 0.030(4) -0.002(3) 0.021(3) 
C19_1 0.045(4) 0.047(6) 0.058(6) 0.025(4) -0.003(4) 0.005(4) 
C20_1 0.081(7) 0.059(5) 0.047(4) 0.028(4) 0.009(5) 0.038(6) 
C21_1 0.112(7) 0.032(3) 0.030(3) 0.009(2) 0.011(4) -0.011(4) 
C22_1 0.093(6) 0.038(3) 0.055(4) 0.020(3) 0.022(4) -0.010(4) 
C23_1 0.076(3) 0.040(4) 0.066(4) -0.002(2) 0.056(3) 0.005(3) 
C24_1 0.040(4) 0.088(6) 0.053(4) 0.015(4) 0.020(3) -0.035(4) 
C25_1 0.029(4) 0.048(4) 0.082(6) -0.008(4) 0.007(4) -0.033(3) 
C26_1 0.026(3) 0.093(7) 0.058(5) -0.013(5) 0.004(3) -0.029(4) 
C27_1 0.040(4) 0.082(6) 0.048(3) -0.004(4) -0.023(3) -0.028(4) 
C28_1 0.051(3) 0.092(10) 0.049(3) -0.001(4) -0.036(3) -0.001(4) 
C29_1 0.062(4) 0.068(8) 0.039(2) 0.002(3) -0.029(3) 0.009(3) 
C30_1 0.072(5) 0.075(5) 0.021(2) -0.003(2) -0.008(2) -0.012(4) 
C31_1 0.067(4) 0.087(8) 0.033(2) -0.009(5) 0.001(2) 0.019(6) 
C32_1 0.071(5) 0.052(4) 0.029(3) 0.007(3) 0.016(3) 0.003(4) 
C33_1 0.053(4) 0.057(4) 0.052(4) 0.019(3) 0.016(3) -0.016(4) 
C34_1 0.050(4) 0.056(4) 0.052(4) -0.011(3) 0.041(3) -0.026(3) 
C35_1 0.050(3) 0.047(3) 0.056(4) -0.001(3) 0.030(3) -0.017(3) 
C36_1 0.0295(19) 0.079(8) 0.049(3) 0.011(5) 0.0190(18) 0.010(4) 
C37_1 0.0197(16) 0.055(8) 0.059(3) 0.005(3) -0.0021(17) -0.003(2) 
C38_1 0.037(3) 0.066(4) 0.055(4) 0.000(4) -0.024(3) 0.016(3) 
C39_1 0.060(3) 0.066(5) 0.054(3) 0.006(8) -0.036(3) 0.012(8) 
C40_1 0.074(5) 0.059(4) 0.028(2) -0.001(2) -0.021(3) 0.005(3) 
C41_1 0.082(7) 0.048(4) 0.024(3) 0.007(3) -0.011(4) 0.016(5) 
C42_1 0.083(6) 0.035(3) 0.025(3) 0.011(2) 0.018(3) -0.006(3) 
C43_1 0.109(7) 0.048(4) 0.025(2) 0.014(3) 0.030(3) 0.009(4) 
C44_1 0.085(6) 0.070(6) 0.058(5) 0.021(4) 0.057(5) 0.000(5) 
C45_1 0.086(5) 0.115(11) 0.073(4) 0.007(8) 0.065(4) -0.011(9) 
C46_1 0.058(5) 0.088(8) 0.113(7) -0.015(5) 0.065(5) 0.004(4) 
C47_1 0.035(3) 0.093(6) 0.102(7) 0.002(6) 0.045(4) -0.011(4) 
C48_1 0.040(3) 0.087(9) 0.113(6) -0.013(7) 0.025(4) 0.024(5) 
C49_1 0.025(2) 0.082(7) 0.086(5) -0.004(4) 0.009(3) -0.007(3) 
C50_1 0.037(3) 0.092(7) 0.113(7) 0.011(5) -0.032(4) 0.018(4) 
C51_1 0.038(4) 0.087(7) 0.114(9) 0.034(7) 0.002(6) 0.034(4) 
C52_1 0.020(3) 0.048(5) 0.097(6) 0.028(4) -0.013(4) 0.005(3) 
C53_1 0.049(4) 0.044(4) 0.049(3) 0.010(3) -0.025(3) 0.014(3) 
C54_1 0.047(4) 0.068(5) 0.033(3) 0.021(3) -0.004(4) 0.009(5) 
C55_1 0.073(5) 0.046(4) 0.043(4) 0.025(3) -0.012(4) -0.019(4) 
C56_1 0.065(5) 0.089(6) 0.049(4) 0.014(4) 0.024(3) -0.026(5) 
C57_1 0.081(7) 0.056(6) 0.087(8) 0.044(6) -0.012(6) -0.035(5) 
C58_1 0.038(3) 0.060(5) 0.070(5) -0.005(4) 0.000(3) -0.025(3) 
C59_1 0.058(5) 0.051(5) 0.055(6) 0.007(4) 0.000(5) -0.035(4) 
C60_1 0.025(2) 0.065(4) 0.044(3) -0.013(3) -0.009(2) -0.007(3) 
C61_1 0.047(3) 0.057(4) 0.036(3) -0.016(3) -0.020(2) -0.001(3) 
C62_1 0.088(7) 0.037(5) 0.044(5) -0.008(4) -0.018(5) -0.001(4) 
C63_1 0.080(7) 0.059(5) 0.036(3) -0.021(3) 0.003(5) 0.009(6) 
C64_1 0.091(6) 0.077(5) 0.0149(19) -0.014(2) 0.005(3) 0.003(4) 
C66_1 0.098(7) 0.056(5) 0.039(4) -0.009(3) 0.048(4) 0.013(5) 
C67_1 0.117(8) 0.092(7) 0.068(5) -0.050(5) 0.038(6) 0.014(7) 
C68_1 0.076(3) 0.040(4) 0.066(4) -0.002(2) 0.056(3) 0.005(3) 
C69_1 0.095(8) 0.100(8) 0.124(9) -0.014(8) 0.076(8) 0.042(7) 
C70_1 0.044(4) 0.086(6) 0.112(7) -0.014(6) 0.033(5) 0.022(4) 
C71_1 0.038(5) 0.076(7) 0.095(8) 0.012(6) 0.019(5) 0.046(5) 
C73_1 0.057(4) 0.013(4) 0.048(2) 0.0005(14) -0.003(2) 0.0015(14) 
C74_1 0.061(4) 0.036(5) 0.042(4) 0.014(3) 0.003(3) 0.014(4) 
C75_1 0.097(7) 0.034(4) 0.077(6) -0.007(4) -0.035(6) 0.021(4) 
C76_1 0.082(6) 0.024(3) 0.057(4) 0.011(3) -0.009(4) -0.016(4) 
C77_1 0.044(3) 0.053(4) 0.047(3) 0.006(3) -0.010(3) -0.024(3) 
C78_1 0.054(4) 0.039(4) 0.045(3) 0.001(3) -0.008(4) -0.025(4) 
C79_1 0.077(5) 0.038(3) 0.053(4) -0.023(3) 0.012(4) -0.006(4) 
C80_1 0.104(8) 0.066(7) 0.065(7) -0.040(5) 0.047(6) -0.020(6) 
C81_1 0.076(6) 0.056(5) 0.078(6) -0.026(5) 0.020(5) -0.002(5) 
C82_1 0.125(8) 0.039(4) 0.052(4) -0.009(3) 0.031(5) 0.030(5) 
C8_1 0.112(4) 0.055(2) 0.079(3) -0.001(2) 0.007(3) -0.058(3) 
C65_1 0.123(6) 0.067(4) 0.033(2) 0.000 0.040(3) 0.000 
Ni1 0.01203(13) 0.01277(13) 0.01767(13) 0.000 0.00199(9) 0.000 
N1 0.0141(5) 0.0151(6) 0.0208(6) 0.0005(5) 0.0026(4) -0.0002(4) 
N2 0.0147(8) 0.0160(8) 0.0197(8) 0.000 0.0016(6) 0.000 
N3 0.0136(7) 0.0149(8) 0.0198(8) 0.000 0.0021(6) 0.000 
C83 0.0152(6) 0.0145(6) 0.0238(7) 0.0017(5) 0.0037(5) 0.0012(5) 
C84 0.0189(7) 0.0145(7) 0.0300(8) 0.0010(6) 0.0023(6) 0.0002(5) 
C85 0.0196(7) 0.0145(7) 0.0301(8) -0.0004(6) 0.0020(6) -0.0002(5) 
C86 0.0167(6) 0.0155(7) 0.0230(7) -0.0004(5) 0.0029(5) -0.0010(5) 
C87 0.0176(6) 0.0164(7) 0.0234(7) -0.0014(6) 0.0012(5) -0.0021(5) 
C88 0.0158(6) 0.0180(7) 0.0201(6) -0.0009(5) 0.0012(5) -0.0011(5) 
C89 0.0173(7) 0.0211(8) 0.0235(7) -0.0002(6) -0.0012(5) -0.0005(6) 
C90 0.0147(6) 0.0209(8) 0.0198(6) 0.0007(6) 0.0011(5) 0.0010(5) 
C91 0.0136(6) 0.0167(7) 0.0204(6) 0.0016(5) 0.0023(5) 0.0011(5) 
C92 0.0153(6) 0.0160(7) 0.0228(7) 0.0015(5) 0.0019(5) 0.0020(5) 
C93 0.0238(8) 0.0161(7) 0.0413(10) 0.0037(7) -0.0015(7) 0.0024(6) 
C94 0.0290(9) 0.0256(10) 0.0524(13) -0.0012(9) 0.0033(9) 0.0106(8) 
C95 0.0266(8) 0.0162(7) 0.0400(10) -0.0026(7) -0.0020(7) -0.0029(6) 
C96 0.0366(11) 0.0272(10) 0.0443(12) -0.0144(9) 0.0012(9) 0.0008(8) 
C97 0.0237(8) 0.0250(9) 0.0289(8) -0.0026(7) -0.0057(7) -0.0031(7) 
C98 0.0345(10) 0.0335(10) 0.0262(8) -0.0056(8) -0.0033(7) -0.0024(8) 
C99 0.0189(7) 0.0257(8) 0.0238(7) 0.0031(6) -0.0006(6) 0.0028(6) 
C100 0.0228(8) 0.0413(12) 0.0351(10) 0.0085(9) 0.0050(7) 0.0121(8) 
C101 0.057(3) 0.106(4) 0.0228(15) 0.000 -0.0019(15) 0.000 
C102 0.048(2) 0.073(3) 0.0237(13) 0.000 0.0123(13) 0.000 
C103 0.0319(14) 0.0497(19) 0.0291(13) 0.000 0.0074(11) 0.000 
C104 0.0328(14) 0.0421(17) 0.0234(12) 0.000 0.0048(10) 0.000 
C105 0.0324(14) 0.0459(18) 0.0292(13) 0.000 0.0073(11) 0.000 
C106 0.0354(17) 0.087(3) 0.0339(17) 0.000 -0.0035(14) 0.000 
 
_geom_special_details 
; 
 All esds (except the esd in the dihedral angle between two l.s. planes) 
 are estimated using the full covariance matrix.  The cell esds are taken 
 into account individually in the estimation of esds in distances, angles 
 and torsion angles; correlations between esds in cell parameters are only 
 used when they are defined by crystal symmetry.  An approximate (isotropic) 
 treatment of cell esds is used for estimating esds involving l.s. planes. 
; 
 
loop_ 
 _geom_bond_atom_site_label_1 
 _geom_bond_atom_site_label_2 
 _geom_bond_distance 
 _geom_bond_site_symmetry_2 
 _geom_bond_publ_flag 
Sm1 Sm6 0.775(9) 6_565 ? 
Sm1 C75_1 2.491(10) 6_565 ? 
Sm1 Sm2 2.499(3) 6_565 ? 
Sm1 C57_1 2.500(16) 6_565 ? 
Sm1 C76_1 2.513(7) 6_565 ? 
Sm1 Sm6 2.537(9) . ? 
Sm1 C23_2 2.577(9) . ? 
Sm1 C42_2 2.596(9) . ? 
Sm1 C4_1 2.596(7) . ? 
Sm1 C3_1 2.622(11) . ? 
Sm1 C43_2 2.636(9) . ? 
Sm1 Sm4 2.642(4) 6_565 ? 
Sm2 Sm5 0.598(4) . ? 
Sm2 Sm4 0.998(5) 6_565 ? 
Sm2 Sm3 1.137(5) . ? 
Sm2 Sm2 1.158(10) 6_565 ? 
Sm2 Sm3 1.299(5) 6_565 ? 
Sm2 C35_2 2.286(10) . ? 
Sm2 C34_2 2.417(10) . ? 
Sm2 C24_1 2.430(8) 6_565 ? 
Sm2 C58_2 2.454(10) . ? 
Sm2 C36_2 2.466(10) 6_565 ? 
Sm2 C37_2 2.499(15) 6_565 ? 
Sm2 Sm1 2.499(3) 6_565 ? 
Sm3 Sm3 0.341(12) 6_565 ? 
Sm3 Sm4 0.690(6) . ? 
Sm3 Sm4 0.838(6) 6_565 ? 
Sm3 Sm5 0.954(8) . ? 
Sm3 Sm2 1.299(5) 6_565 ? 
Sm3 C16_2 2.276(12) 6_565 ? 
Sm3 C14_2 2.334(9) . ? 
Sm3 C34_2 2.337(10) . ? 
Sm3 C36_2 2.338(12) 6_565 ? 
Sm3 C15_2 2.346(9) . ? 
Sm3 C15_2 2.378(9) 6_565 ? 
Sm4 Sm4 0.660(11) 6_565 ? 
Sm4 Sm3 0.838(6) 6_565 ? 
Sm4 Sm2 0.998(5) 6_565 ? 
Sm4 C35_2 2.183(10) . ? 
Sm4 C36_2 2.263(11) 6_565 ? 
Sm4 C34_2 2.303(9) . ? 
Sm4 C35_2 2.387(10) 6_565 ? 
Sm4 C36_2 2.438(11) . ? 
Sm4 C45_1 2.541(7) 6_565 ? 
Sm4 C44_1 2.554(7) 6_565 ? 
Sm4 C16_2 2.556(12) 6_565 ? 
Sm5 Sm4 0.428(3) 6_565 ? 
Sm5 Sm2 0.598(4) 6_565 ? 
Sm5 Sm3 0.954(8) 6_565 ? 
Sm5 C35_2 2.295(10) . ? 
Sm5 C35_2 2.295(10) 6_565 ? 
Sm5 C36_2 2.425(11) . ? 
Sm5 C36_2 2.425(12) 6_565 ? 
Sm5 C58_2 2.561(11) 6_565 ? 
Sm5 C58_2 2.561(11) . ? 
Sm5 C46_1 2.570(8) 6_565 ? 
Sm6 Sm1 0.774(9) 6_565 ? 
Sm6 Sm6 1.989(18) 6_565 ? 
Sm6 C56_1 2.524(11) . ? 
Sm6 C15_1 2.551(10) 6_565 ? 
Sm6 C14_1 2.558(11) 6_565 ? 
Sm6 C23_2 2.560(17) 6_565 ? 
Sm6 C57_1 2.605(18) . ? 
Sm6 C33_1 2.635(11) . ? 
Sm6 C44_2 2.661(18) 6_565 ? 
Sm6 C2_1 2.689(11) 6_565 ? 
Sm6 C3_1 2.702(14) 6_565 ? 
C1_1 C2_1 1.427(13) . ? 
C1_1 C6_1 1.459(13) . ? 
C1_1 C9_1 1.493(14) . ? 
C1_1 Sm6 3.039(19) 6_565 ? 
C2_1 C12_1 1.362(10) . ? 
C2_1 C3_1 1.463(13) . ? 
C2_1 Sm6 2.689(11) 6_565 ? 
C3_1 C4_1 1.460(12) . ? 
C3_1 C15_1 1.489(11) . ? 
C3_1 Sm6 2.701(14) 6_565 ? 
C4_1 C5_1 1.447(11) . ? 
C4_1 C17_1 1.505(14) . ? 
C4_1 Sm6 3.026(12) 6_565 ? 
C5_1 C20_1 1.366(11) . ? 
C5_1 C6_1 1.452(12) . ? 
C6_1 C7_1 1.473(11) . ? 
C7_1 C22_1 1.480(9) . ? 
C7_1 C8_1 1.510(9) . ? 
C9_1 C8_1 1.487(9) . ? 
C9_1 C10_1 1.529(10) . ? 
C10_1 C27_1 1.412(10) . ? 
C10_1 C11_1 1.478(11) . ? 
C11_1 C12_1 1.419(11) . ? 
C11_1 C30_1 1.449(11) . ? 
C12_1 C13_1 1.492(12) . ? 
C12_1 Sm6 2.759(10) 6_565 ? 
C13_1 C14_1 1.357(11) . ? 
C13_1 C31_1 1.470(11) . ? 
C13_1 Sm6 2.733(11) 6_565 ? 
C14_1 C34_1 1.431(10) . ? 
C14_1 C15_1 1.462(9) . ? 
C14_1 Sm6 2.558(11) 6_565 ? 
C15_1 C16_1 1.501(9) . ? 
C15_1 Sm6 2.551(10) 6_565 ? 
C16_1 C36_1 1.344(15) . ? 
C16_1 C17_1 1.498(10) . ? 
C16_1 Sm6 3.019(10) 6_565 ? 
C17_1 C18_1 1.505(11) . ? 
C18_1 C38_1 1.382(10) . ? 
C18_1 C19_1 1.474(11) . ? 
C19_1 C41_1 1.442(11) . ? 
C19_1 C20_1 1.445(12) . ? 
C20_1 C21_1 1.518(12) . ? 
C21_1 C22_1 1.349(11) . ? 
C21_1 C42_1 1.467(9) . ? 
C22_1 C23_1 1.454(10) . ? 
C22_1 Sm2 2.911(8) 6_565 ? 
C22_1 Sm4 3.042(8) 6_565 ? 
C23_1 C24_1 1.451(12) . ? 
C23_1 C44_1 1.489(12) . ? 
C23_1 Sm2 2.500(15) 6_565 ? 
C23_1 Sm4 2.602(15) 6_565 ? 
C23_1 Sm3 2.895(15) 6_565 ? 
C24_1 C47_1 1.346(11) . ? 
C24_1 C25_1 1.443(13) . ? 
C24_1 Sm2 2.430(8) 6_565 ? 
C24_1 Sm4 2.697(10) 6_565 ? 
C25_1 C8_1 1.318(13) . ? 
C25_1 C26_1 1.428(11) . ? 
C25_1 Sm2 2.763(9) 6_565 ? 
C26_1 C49_1 1.343(12) . ? 
C26_1 C27_1 1.502(10) . ? 
C27_1 C28_1 1.432(12) . ? 
C28_1 C29_1 1.350(10) . ? 
C28_1 C50_1 1.489(14) . ? 
C29_1 C30_1 1.408(10) . ? 
C29_1 C53_1 1.468(10) . ? 
C30_1 C31_1 1.437(10) . ? 
C31_1 C32_1 1.354(13) . ? 
C32_1 C54_1 1.421(9) . ? 
C32_1 C33_1 1.434(11) . ? 
C33_1 C56_1 1.266(14) . ? 
C33_1 C34_1 1.503(11) . ? 
C34_1 C35_1 1.448(11) . ? 
C34_1 Sm6 3.026(11) 6_565 ? 
C35_1 C58_1 1.338(10) . ? 
C35_1 C36_1 1.471(13) . ? 
C36_1 C37_1 1.425(9) . ? 
C37_1 C60_1 1.351(12) . ? 
C37_1 C38_1 1.485(10) . ? 
C38_1 C39_1 1.442(12) . ? 
C39_1 C40_1 1.348(10) . ? 
C39_1 C61_1 1.495(16) . ? 
C40_1 C41_1 1.441(10) . ? 
C40_1 C64_1 1.469(9) . ? 
C41_1 C42_1 1.444(11) . ? 
C42_1 C43_1 1.349(12) . ? 
C42_1 Sm3 2.922(8) 6_565 ? 
C43_1 C65_1 1.383(8) . ? 
C43_1 C44_1 1.457(12) . ? 
C43_1 Sm3 2.575(6) 6_565 ? 
C43_1 Sm4 2.896(7) 6_565 ? 
C44_1 C45_1 1.29(2) . ? 
C44_1 Sm4 2.554(7) 6_565 ? 
C44_1 Sm3 2.585(7) 6_565 ? 
C44_1 Sm2 2.716(7) 6_565 ? 
C45_1 C46_1 1.355(14) . ? 
C45_1 C66_1 1.561(14) . ? 
C45_1 Sm4 2.541(7) 6_565 ? 
C45_1 Sm3 2.611(7) 6_565 ? 
C45_1 Sm2 2.768(8) 6_565 ? 
C46_1 C69_1 1.405(15) . ? 
C46_1 C47_1 1.473(12) . ? 
C46_1 Sm4 2.686(8) 6_565 ? 
C46_1 Sm2 2.776(7) 6_565 ? 
C46_1 Sm3 3.005(8) 6_565 ? 
C47_1 C48_1 1.446(13) . ? 
C47_1 Sm2 2.616(7) 6_565 ? 
C47_1 Sm4 2.779(9) 6_565 ? 
C48_1 C49_1 1.338(12) . ? 
C48_1 C70_1 1.350(16) . ? 
C49_1 C50_1 1.499(10) . ? 
C50_1 C51_1 1.328(13) . ? 
C51_1 C52_1 1.436(13) . ? 
C51_1 C71_1 1.524(14) . ? 
C52_1 C73_1 1.377(11) . ? 
C52_1 C53_1 1.397(11) . ? 
C53_1 C54_1 1.378(10) . ? 
C54_1 C55_1 1.447(11) . ? 
C55_1 C74_1 1.366(12) . ? 
C55_1 C56_1 1.556(12) . ? 
C55_1 Sm1 2.897(6) 6_565 ? 
C56_1 C57_1 1.359(14) . ? 
C56_1 Sm1 2.753(7) 6_565 ? 
C57_1 C76_1 1.394(16) . ? 
C57_1 C58_1 1.481(13) . ? 
C57_1 Sm1 2.500(16) 6_565 ? 
C58_1 C59_1 1.460(13) . ? 
C58_1 Sm1 2.889(7) 6_565 ? 
C59_1 C60_1 1.335(13) . ? 
C59_1 C77_1 1.350(16) . ? 
C59_1 Sm1 2.988(17) 6_565 ? 
C60_1 C61_1 1.479(9) . ? 
C61_1 C62_1 1.356(12) . ? 
C62_1 C63_1 1.443(14) . ? 
C62_1 C78_1 1.516(12) . ? 
C63_1 C80_1 1.405(12) . ? 
C63_1 C64_1 1.439(12) . ? 
C64_1 C65_1 1.382(10) . ? 
C64_1 Sm3 2.871(7) 6_565 ? 
C66_1 C67_1 1.382(12) . ? 
C66_1 C65_1 1.456(11) . ? 
C66_1 Sm3 2.540(7) 6_565 ? 
C66_1 Sm4 2.818(8) 6_565 ? 
C67_1 C68_1 1.456(12) . ? 
C67_1 C80_1 1.457(12) . ? 
C67_1 Sm3 2.834(9) 6_565 ? 
C68_1 C69_1 1.371(14) . ? 
C68_1 C82_1 1.453(11) . ? 
C69_1 C70_1 1.486(12) . ? 
C69_1 Sm4 3.059(11) 6_565 ? 
C70_1 C71_1 1.376(12) . ? 
C71_1 C8_1 1.560(10) 6_565 ? 
C73_1 C74_1 1.457(12) . ? 
C73_1 C8_1 1.467(9) 6_565 ? 
C74_1 C75_1 1.465(12) . ? 
C74_1 Sm1 2.738(11) 6_565 ? 
C75_1 C76_1 1.356(13) . ? 
C75_1 C81_1 1.480(12) . ? 
C75_1 Sm1 2.491(10) 6_565 ? 
C76_1 C77_1 1.486(10) . ? 
C76_1 Sm1 2.513(7) 6_565 ? 
C77_1 C78_1 1.362(11) . ? 
C77_1 Sm1 2.842(6) 6_565 ? 
C78_1 C79_1 1.570(11) . ? 
C79_1 C81_1 1.306(10) . ? 
C79_1 C80_1 1.499(11) . ? 
C81_1 C82_1 1.488(13) . ? 
C81_1 Sm1 2.821(9) 6_565 ? 
C82_1 C8_1 1.298(8) 6_565 ? 
C8_1 C82_1 1.298(8) 6_565 ? 
C8_1 C73_1 1.466(9) 6_565 ? 
C8_1 C61_2 1.491(13) . ? 
C65_1 C64_1 1.382(10) 6_565 ? 
C65_1 C43_1 1.383(8) 6_565 ? 
C65_1 C66_1 1.457(11) 6_565 ? 
C1_2 C6_2 1.4471 . ? 
C1_2 C2_2 1.4516 . ? 
C1_2 C9_2 1.6048 . ? 
C2_2 C12_2 1.3737 . ? 
C2_2 C3_2 1.4474 . ? 
C3_2 C4_2 1.4483 . ? 
C3_2 C15_2 1.4838 . ? 
C3_2 Sm3 2.975(10) 6_565 ? 
C4_2 C5_2 1.4651 . ? 
C4_2 C17_2 1.6078 . ? 
C4_2 Sm3 3.056(10) 6_565 ? 
C5_2 C20_2 1.3709 . ? 
C5_2 C6_2 1.4424 . ? 
C6_2 C7_2 1.4757 . ? 
C7_2 C22_2 1.4685 . ? 
C7_2 C8_2 1.4913 . ? 
C8_2 C25_2 1.3330 . ? 
C8_2 C9_2 1.4838 . ? 
C9_2 C10_2 1.4384 . ? 
C10_2 C27_2 1.3778 . ? 
C10_2 C11_2 1.4503 . ? 
C11_2 C12_2 1.4095 . ? 
C11_2 C30_2 1.4424 . ? 
C12_2 C13_2 1.4637 . ? 
C13_2 C14_2 1.3713 . ? 
C13_2 C31_2 1.4810 . ? 
C14_2 C34_2 1.3975 . ? 
C14_2 C15_2 1.4580 . ? 
C14_2 Sm3 2.555(10) 6_565 ? 
C14_2 Sm4 3.039(11) 6_565 ? 
C15_2 C16_2 1.4834 . ? 
C15_2 Sm3 2.378(9) 6_565 ? 
C15_2 Sm4 2.931(10) 6_565 ? 
C16_2 C36_2 1.3588 . ? 
C16_2 C17_2 1.5051 . ? 
C16_2 Sm3 2.276(10) 6_565 ? 
C16_2 Sm4 2.556(10) 6_565 ? 
C16_2 Sm2 2.880(10) 6_565 ? 
C17_2 C18_2 1.4379 . ? 
C17_2 Sm3 2.850(11) 6_565 ? 
C18_2 C38_2 1.3662 . ? 
C18_2 C19_2 1.4631 . ? 
C19_2 C20_2 1.4350 . ? 
C19_2 C41_2 1.4380 . ? 
C20_2 C21_2 1.4730 . ? 
C21_2 C22_2 1.3412 . ? 
C21_2 C42_2 1.4816 . ? 
C22_2 C23_2 1.3826 . ? 
C22_2 Sm6 3.006(13) 6_565 ? 
C23_2 C24_2 1.4629 . ? 
C23_2 C44_2 1.5343 . ? 
C23_2 Sm6 2.560(12) 6_565 ? 
C24_2 C47_2 1.3408 . ? 
C24_2 C25_2 1.4161 . ? 
C24_2 Sm6 2.918(12) 6_565 ? 
C25_2 C26_2 1.4359 . ? 
C26_2 C49_2 1.3430 . ? 
C26_2 C27_2 1.4987 . ? 
C27_2 C28_2 1.4072 . ? 
C27_2 Sm1 3.033(10) 6_565 ? 
C28_2 C29_2 1.3370 . ? 
C28_2 C50_2 1.4988 . ? 
C28_2 Sm1 2.779(9) 6_565 ? 
C29_2 C30_2 1.4042 . ? 
C29_2 C53_2 1.4718 . ? 
C29_2 Sm1 2.718(9) 6_565 ? 
C30_2 C31_2 1.4370 . ? 
C30_2 Sm1 3.024(10) 6_565 ? 
C31_2 C32_2 1.3931 . ? 
C32_2 C54_2 1.4171 . ? 
C32_2 C33_2 1.4463 . ? 
C33_2 C56_2 1.2212 . ? 
C33_2 C34_2 1.5365 . ? 
C34_2 C35_2 1.4620 . ? 
C34_2 Sm3 2.578(10) 6_565 ? 
C34_2 Sm4 2.757(10) 6_565 ? 
C35_2 C58_2 1.3390 . ? 
C35_2 C36_2 1.4485 . ? 
C35_2 Sm4 2.387(9) 6_565 ? 
C35_2 Sm3 2.523(10) 6_565 ? 
C35_2 Sm2 2.620(9) 6_565 ? 
C36_2 C37_2 1.4424 . ? 
C36_2 Sm4 2.263(9) 6_565 ? 
C36_2 Sm3 2.338(10) 6_565 ? 
C36_2 Sm2 2.466(9) 6_565 ? 
C37_2 C60_2 1.3539 . ? 
C37_2 C38_2 1.4892 . ? 
C37_2 Sm2 2.498(10) 6_565 ? 
C37_2 Sm4 2.565(11) 6_565 ? 
C37_2 Sm3 2.912(11) 6_565 ? 
C38_2 C39_2 1.4134 . ? 
C38_2 Sm2 2.770(11) 6_565 ? 
C38_2 Sm4 2.914(11) 6_565 ? 
C39_2 C40_2 1.3413 . ? 
C39_2 C61_2 1.5055 . ? 
C39_2 Sm2 3.038(11) 6_565 ? 
C40_2 C41_2 1.4382 . ? 
C40_2 C64_2 1.4770 . ? 
C41_2 C42_2 1.4401 . ? 
C42_2 C43_2 1.3880 . ? 
C43_2 C65_2 1.3840 . ? 
C43_2 C44_2 1.4684 . ? 
C43_2 Sm6 2.839(13) 6_565 ? 
C44_2 C45_2 1.3271 . ? 
C44_2 Sm6 2.660(12) 6_565 ? 
C45_2 C46_2 1.3888 . ? 
C45_2 C66_2 1.5546 . ? 
C45_2 Sm6 2.722(12) 6_565 ? 
C46_2 C69_2 1.3890 . ? 
C46_2 C47_2 1.4587 . ? 
C46_2 Sm6 2.976(12) 6_565 ? 
C47_2 C48_2 1.3851 . ? 
C47_2 Sm6 3.066(12) 6_565 ? 
C48_2 C70_2 1.3477 . ? 
C48_2 C49_2 1.3942 . ? 
C49_2 C50_2 1.4853 . ? 
C50_2 C51_2 1.3558 . ? 
C50_2 Sm1 2.928(10) 6_565 ? 
C51_2 C52_2 1.4024 . ? 
C51_2 C71_2 1.5339 . ? 
C51_2 Sm1 2.938(10) 6_565 ? 
C52_2 C53_2 1.4559 . ? 
C52_2 C73_2 1.4585 . ? 
C52_2 Sm1 2.818(10) 6_565 ? 
C53_2 C54_2 1.3826 . ? 
C53_2 Sm1 2.747(9) 6_565 ? 
C54_2 C55_2 1.4843 . ? 
C54_2 Sm1 3.046(11) 6_565 ? 
C55_2 C74_2 1.3694 . ? 
C55_2 C56_2 1.5562 . ? 
C56_2 C57_2 1.3900 . ? 
C57_2 C76_2 1.3875 . ? 
C57_2 C58_2 1.4657 . ? 
C58_2 C59_2 1.3998 . ? 
C58_2 Sm4 2.793(10) 6_565 ? 
C58_2 Sm2 2.823(10) 6_565 ? 
C59_2 C77_2 1.3544 . ? 
C59_2 C60_2 1.3964 . ? 
C59_2 Sm2 2.620(10) 6_565 ? 
C59_2 Sm4 2.818(11) 6_565 ? 
C60_2 C61_2 1.4616 . ? 
C60_2 Sm2 2.648(10) 6_565 ? 
C60_2 Sm4 2.895(11) 6_565 ? 
C61_2 C62_2 1.3823 . ? 
C61_2 Sm2 2.945(10) 6_565 ? 
C62_2 C63_2 1.4089 . ? 
C62_2 C78_2 1.5273 . ? 
C63_2 C64_2 1.4722 . ? 
C63_2 C80_2 1.4731 . ? 
C64_2 C65_2 1.3744 . ? 
C65_2 C66_2 1.4962 . ? 
C65_2 Sm6 2.975(13) 6_565 ? 
C66_2 C67_2 1.3882 . ? 
C66_2 Sm6 2.900(12) 6_565 ? 
C67_2 C80_2 1.4081 . ? 
C67_2 C68_2 1.4561 . ? 
C68_2 C69_2 1.2851 . ? 
C68_2 C82_2 1.6485 . ? 
C69_2 C70_2 1.4454 . ? 
C70_2 C71_2 1.3577 . ? 
C71_2 C72_2 1.5396 . ? 
C72_2 C82_2 1.3046 . ? 
C72_2 C73_2 1.4573 . ? 
C73_2 C74_2 1.3990 . ? 
C74_2 C75_2 1.4608 . ? 
C75_2 C76_2 1.2772 . ? 
C75_2 C81_2 1.6520 . ? 
C76_2 C77_2 1.4641 . ? 
C77_2 C78_2 1.3519 . ? 
C78_2 C79_2 1.5497 . ? 
C79_2 C81_2 1.3104 . ? 
C79_2 C80_2 1.4751 . ? 
C81_2 C82_2 1.4507 . ? 
Ni1 N2 1.956(2) . ? 
Ni1 N3 1.957(2) . ? 
Ni1 N1 1.9667(15) 6_565 ? 
Ni1 N1 1.9668(15) . ? 
N1 C86 1.376(2) . ? 
N1 C83 1.379(2) . ? 
N2 C88 1.378(2) 6_565 ? 
N2 C88 1.378(2) . ? 
N3 C91 1.379(2) 6_565 ? 
N3 C91 1.379(2) . ? 
C83 C92 1.375(2) . ? 
C83 C84 1.444(2) . ? 
C84 C85 1.363(3) . ? 
C84 C93 1.506(3) . ? 
C85 C86 1.449(2) . ? 
C85 C95 1.501(3) . ? 
C86 C87 1.380(2) . ? 
C87 C88 1.377(2) . ? 
C87 H87 0.9500 . ? 
C88 C89 1.450(2) . ? 
C89 C89 1.358(4) 6_565 ? 
C89 C97 1.499(3) . ? 
C90 C90 1.367(4) 6_565 ? 
C90 C91 1.444(2) . ? 
C90 C99 1.497(2) . ? 
C91 C92 1.376(2) . ? 
C92 H92 0.9500 . ? 
C93 C94 1.535(3) . ? 
C93 H93A 0.9900 . ? 
C93 H93B 0.9900 . ? 
C94 H94A 0.9800 . ? 
C94 H94B 0.9800 . ? 
C94 H94C 0.9800 . ? 
C95 C96 1.533(3) . ? 
C95 H95A 0.9900 . ? 
C95 H95B 0.9900 . ? 
C96 H96A 0.9800 . ? 
C96 H96B 0.9800 . ? 
C96 H96C 0.9800 . ? 
C97 C98 1.530(3) . ? 
C97 H97A 0.9900 . ? 
C97 H97B 0.9900 . ? 
C98 H98A 0.9800 . ? 
C98 H98B 0.9800 . ? 
C98 H98C 0.9800 . ? 
C99 C100 1.530(3) . ? 
C99 H99A 0.9900 . ? 
C99 H99B 0.9900 . ? 
C100 H10A 0.9800 . ? 
C100 H10B 0.9800 . ? 
C100 H10C 0.9800 . ? 
C101 C106 1.378(6) . ? 
C101 C102 1.388(7) . ? 
C101 H101 0.9500 . ? 
C102 C103 1.385(5) . ? 
C102 H102 0.9500 . ? 
C103 C104 1.386(4) . ? 
C103 H103 0.9500 . ? 
C104 C105 1.385(5) . ? 
C104 H104 0.9500 . ? 
C105 C106 1.383(5) . ? 
C105 H105 0.9500 . ? 
C106 H106 0.9500 . ? 
C107 C108 1.332(11) . ? 
C107 H107 0.9500 . ? 
C108 C109 1.399(11) . ? 
C108 H108 0.9500 . ? 
C109 H109 0.9500 . ? 
C110 C111 1.3900 . ? 
C110 C115 1.3900 . ? 
C110 H110 0.9500 . ? 
C111 C112 1.3900 . ? 
C111 H111 0.9500 . ? 
C112 C113 1.3900 . ? 
C112 H112 0.9500 . ? 
C113 C114 1.3900 . ? 
C113 H113 0.9500 . ? 
C114 C115 1.3900 . ? 
C114 H114 0.9500 . ? 
C115 H115 0.9500 . ? 
 
loop_ 
 _geom_angle_atom_site_label_1 
 _geom_angle_atom_site_label_2 
 _geom_angle_atom_site_label_3 
 _geom_angle 
 _geom_angle_site_symmetry_1 
 _geom_angle_site_symmetry_3 
 _geom_angle_publ_flag 
C75_1 Sm1 C57_1 57.8(4) 6_565 6_565 ? 
C75_1 Sm1 C76_1 31.4(3) 6_565 6_565 ? 
C57_1 Sm1 C76_1 32.3(4) 6_565 6_565 ? 
C75_1 Sm1 C23_2 78.7(4) 6_565 . ? 
C57_1 Sm1 C23_2 22.0(4) 6_565 . ? 
C76_1 Sm1 C23_2 49.8(4) 6_565 . ? 
C75_1 Sm1 C42_2 15.8(3) 6_565 . ? 
C57_1 Sm1 C42_2 46.6(4) 6_565 . ? 
C76_1 Sm1 C42_2 16.4(3) 6_565 . ? 
C23_2 Sm1 C42_2 65.8(2) . . ? 
C75_1 Sm1 C4_1 47.3(3) 6_565 . ? 
C57_1 Sm1 C4_1 28.7(4) 6_565 . ? 
C76_1 Sm1 C4_1 16.3(2) 6_565 . ? 
C23_2 Sm1 C4_1 39.1(4) . . ? 
C42_2 Sm1 C4_1 31.7(3) . . ? 
C75_1 Sm1 C3_1 53.8(4) 6_565 . ? 
C57_1 Sm1 C3_1 7.6(4) 6_565 . ? 
C76_1 Sm1 C3_1 32.2(3) 6_565 . ? 
C23_2 Sm1 C3_1 28.4(4) . . ? 
C42_2 Sm1 C3_1 44.5(3) . . ? 
C4_1 Sm1 C3_1 32.5(3) . . ? 
C75_1 Sm1 C43_2 30.7(4) 6_565 . ? 
C57_1 Sm1 C43_2 36.1(4) 6_565 . ? 
C76_1 Sm1 C43_2 31.6(3) 6_565 . ? 
C23_2 Sm1 C43_2 57.87(19) . . ? 
C42_2 Sm1 C43_2 30.76(11) . . ? 
C4_1 Sm1 C43_2 44.6(3) . . ? 
C3_1 Sm1 C43_2 29.5(3) . . ? 
C35_2 Sm2 C34_2 36.08(15) . . ? 
C35_2 Sm2 C24_1 48.0(4) . 6_565 ? 
C34_2 Sm2 C24_1 57.2(4) . 6_565 ? 
C35_2 Sm2 C58_2 32.57(14) . . ? 
C34_2 Sm2 C58_2 60.3(2) . . ? 
C24_1 Sm2 C58_2 27.4(4) 6_565 . ? 
C35_2 Sm2 C36_2 13.24(14) . 6_565 ? 
C34_2 Sm2 C36_2 30.6(6) . 6_565 ? 
C24_1 Sm2 C36_2 59.4(4) 6_565 6_565 ? 
C58_2 Sm2 C36_2 45.8(2) . 6_565 ? 
C35_2 Sm2 C37_2 25.8(5) . 6_565 ? 
C34_2 Sm2 C37_2 31.32(15) . 6_565 ? 
C24_1 Sm2 C37_2 27.9(4) 6_565 6_565 ? 
C58_2 Sm2 C37_2 31.2(4) . 6_565 ? 
C36_2 Sm2 C37_2 33.8(2) 6_565 6_565 ? 
C16_2 Sm3 C14_2 26.2(5) 6_565 . ? 
C16_2 Sm3 C34_2 32.7(5) 6_565 . ? 
C14_2 Sm3 C34_2 34.81(14) . . ? 
C16_2 Sm3 C36_2 34.22(17) 6_565 6_565 ? 
C14_2 Sm3 C36_2 55.3(4) . 6_565 ? 
C34_2 Sm3 C36_2 32.0(6) . 6_565 ? 
C16_2 Sm3 C15_2 30.0(4) 6_565 . ? 
C14_2 Sm3 C15_2 36.30(14) . . ? 
C34_2 Sm3 C15_2 61.3(2) . . ? 
C36_2 Sm3 C15_2 60.8(2) 6_565 . ? 
C16_2 Sm3 C15_2 37.09(18) 6_565 6_565 ? 
C14_2 Sm3 C15_2 47.0(7) . 6_565 ? 
C34_2 Sm3 C15_2 69.6(6) . 6_565 ? 
C36_2 Sm3 C15_2 63.5(3) 6_565 6_565 ? 
C15_2 Sm3 C15_2 10.8(7) . 6_565 ? 
C35_2 Sm4 C36_2 14.76(16) . 6_565 ? 
C35_2 Sm4 C34_2 37.92(16) . . ? 
C36_2 Sm4 C34_2 32.8(7) 6_565 . ? 
C35_2 Sm4 C35_2 35.7(7) . 6_565 ? 
C36_2 Sm4 C35_2 36.17(16) 6_565 6_565 ? 
C34_2 Sm4 C35_2 68.9(7) . 6_565 ? 
C35_2 Sm4 C36_2 36.00(16) . . ? 
C36_2 Sm4 C36_2 30.5(6) 6_565 . ? 
C34_2 Sm4 C36_2 62.2(2) . . ? 
C35_2 Sm4 C36_2 13.67(13) 6_565 . ? 
C35_2 Sm4 C45_1 17.9(6) . 6_565 ? 
C36_2 Sm4 C45_1 11.8(6) 6_565 6_565 ? 
C34_2 Sm4 C45_1 44.6(6) . 6_565 ? 
C35_2 Sm4 C45_1 24.5(6) 6_565 6_565 ? 
C36_2 Sm4 C45_1 19.4(6) . 6_565 ? 
C35_2 Sm4 C44_1 25.2(4) . 6_565 ? 
C36_2 Sm4 C44_1 17.6(4) 6_565 6_565 ? 
C34_2 Sm4 C44_1 15.2(4) . 6_565 ? 
C35_2 Sm4 C44_1 53.8(4) 6_565 6_565 ? 
C36_2 Sm4 C44_1 47.2(4) . 6_565 ? 
C45_1 Sm4 C44_1 29.4(5) 6_565 6_565 ? 
C35_2 Sm4 C16_2 46.06(19) . 6_565 ? 
C36_2 Sm4 C16_2 32.02(16) 6_565 6_565 ? 
C34_2 Sm4 C16_2 30.5(6) . 6_565 ? 
C35_2 Sm4 C16_2 59.2(2) 6_565 6_565 ? 
C36_2 Sm4 C16_2 47.1(4) . 6_565 ? 
C45_1 Sm4 C16_2 38.6(5) 6_565 6_565 ? 
C44_1 Sm4 C16_2 26.2(4) 6_565 6_565 ? 
C35_2 Sm5 C35_2 35.8(7) . 6_565 ? 
C35_2 Sm5 C36_2 35.61(15) . . ? 
C35_2 Sm5 C36_2 13.67(16) 6_565 . ? 
C35_2 Sm5 C36_2 13.67(17) . 6_565 ? 
C35_2 Sm5 C36_2 35.61(16) 6_565 6_565 ? 
C36_2 Sm5 C36_2 29.9(6) . 6_565 ? 
C35_2 Sm5 C58_2 49.3(5) . 6_565 ? 
C35_2 Sm5 C58_2 31.40(14) 6_565 6_565 ? 
C36_2 Sm5 C58_2 45.06(18) . 6_565 ? 
C36_2 Sm5 C58_2 57.5(3) 6_565 6_565 ? 
C35_2 Sm5 C58_2 31.40(13) . . ? 
C35_2 Sm5 C58_2 49.3(5) 6_565 . ? 
C36_2 Sm5 C58_2 57.5(2) . . ? 
C36_2 Sm5 C58_2 45.1(2) 6_565 . ? 
C58_2 Sm5 C58_2 38.3(6) 6_565 . ? 
C35_2 Sm5 C46_1 31.9(4) . 6_565 ? 
C35_2 Sm5 C46_1 19.3(4) 6_565 6_565 ? 
C36_2 Sm5 C46_1 31.4(4) . 6_565 ? 
C36_2 Sm5 C46_1 39.3(4) 6_565 6_565 ? 
C58_2 Sm5 C46_1 18.3(4) 6_565 6_565 ? 
C58_2 Sm5 C46_1 32.0(4) . 6_565 ? 
C56_1 Sm6 C15_1 34.6(3) . 6_565 ? 
C56_1 Sm6 C14_1 42.3(3) . 6_565 ? 
C15_1 Sm6 C14_1 33.3(2) 6_565 6_565 ? 
C56_1 Sm6 C23_2 41.1(4) . 6_565 ? 
C15_1 Sm6 C23_2 15.2(3) 6_565 6_565 ? 
C14_1 Sm6 C23_2 48.4(4) 6_565 6_565 ? 
C56_1 Sm6 C57_1 30.7(3) . . ? 
C15_1 Sm6 C57_1 29.4(4) 6_565 . ? 
C14_1 Sm6 C57_1 58.4(4) 6_565 . ? 
C23_2 Sm6 C57_1 21.7(4) 6_565 . ? 
C56_1 Sm6 C33_1 28.3(3) . . ? 
C15_1 Sm6 C33_1 36.9(3) 6_565 . ? 
C14_1 Sm6 C33_1 18.1(2) 6_565 . ? 
C23_2 Sm6 C33_1 51.1(4) 6_565 . ? 
C57_1 Sm6 C33_1 52.9(4) . . ? 
C56_1 Sm6 C44_2 10.6(4) . 6_565 ? 
C15_1 Sm6 C44_2 31.7(4) 6_565 6_565 ? 
C14_1 Sm6 C44_2 48.2(3) 6_565 6_565 ? 
C23_2 Sm6 C44_2 34.1(2) 6_565 6_565 ? 
C57_1 Sm6 C44_2 20.4(4) . 6_565 ? 
C33_1 Sm6 C44_2 37.0(3) . 6_565 ? 
C56_1 Sm6 C2_1 25.4(3) . 6_565 ? 
C15_1 Sm6 C2_1 57.1(3) 6_565 6_565 ? 
C14_1 Sm6 C2_1 66.6(3) 6_565 6_565 ? 
C23_2 Sm6 C2_1 58.1(4) 6_565 6_565 ? 
C57_1 Sm6 C2_1 38.9(4) . 6_565 ? 
C33_1 Sm6 C2_1 50.3(3) . 6_565 ? 
C44_2 Sm6 C2_1 25.4(4) 6_565 6_565 ? 
C56_1 Sm6 C3_1 25.2(3) . 6_565 ? 
C15_1 Sm6 C3_1 32.8(3) 6_565 6_565 ? 
C14_1 Sm6 C3_1 58.3(3) 6_565 6_565 ? 
C23_2 Sm6 C3_1 27.9(3) 6_565 6_565 ? 
C57_1 Sm6 C3_1 7.5(4) . 6_565 ? 
C33_1 Sm6 C3_1 50.1(3) . 6_565 ? 
C44_2 Sm6 C3_1 14.6(4) 6_565 6_565 ? 
C2_1 Sm6 C3_1 31.5(3) 6_565 6_565 ? 
C2_1 C1_1 C6_1 130.5(12) . . ? 
C2_1 C1_1 C9_1 116.2(10) . . ? 
C6_1 C1_1 C9_1 102.8(9) . . ? 
C2_1 C1_1 Sm1 73.1(7) . . ? 
C6_1 C1_1 Sm1 75.3(7) . . ? 
C9_1 C1_1 Sm1 93.7(9) . . ? 
C2_1 C1_1 Sm6 62.2(7) . 6_565 ? 
C6_1 C1_1 Sm6 89.7(8) . 6_565 ? 
C9_1 C1_1 Sm6 90.4(8) . 6_565 ? 
C12_1 C2_1 C1_1 120.2(9) . . ? 
C12_1 C2_1 C3_1 123.1(8) . . ? 
C1_1 C2_1 C3_1 108.9(9) . . ? 
C12_1 C2_1 Sm6 78.4(4) . 6_565 ? 
C1_1 C2_1 Sm6 89.8(8) . 6_565 ? 
C3_1 C2_1 Sm6 74.7(6) . 6_565 ? 
C12_1 C2_1 Sm1 93.7(4) . . ? 
C1_1 C2_1 Sm1 76.7(8) . . ? 
C3_1 C2_1 Sm1 70.4(5) . . ? 
C4_1 C3_1 C2_1 123.0(9) . . ? 
C4_1 C3_1 C15_1 104.8(7) . . ? 
C2_1 C3_1 C15_1 116.3(8) . . ? 
C4_1 C3_1 Sm1 72.8(5) . . ? 
C2_1 C3_1 Sm1 77.9(6) . . ? 
C15_1 C3_1 Sm1 79.2(5) . . ? 
C4_1 C3_1 Sm6 88.0(6) . 6_565 ? 
C2_1 C3_1 Sm6 73.8(6) . 6_565 ? 
C15_1 C3_1 Sm6 68.0(5) . 6_565 ? 
C5_1 C4_1 C3_1 124.7(9) . . ? 
C5_1 C4_1 C17_1 118.9(8) . . ? 
C3_1 C4_1 C17_1 109.2(8) . . ? 
C5_1 C4_1 Sm1 78.7(4) . . ? 
C3_1 C4_1 Sm1 74.7(6) . . ? 
C17_1 C4_1 Sm1 91.0(6) . . ? 
C5_1 C4_1 Sm6 90.9(5) . 6_565 ? 
C3_1 C4_1 Sm6 63.1(5) . 6_565 ? 
C17_1 C4_1 Sm6 89.2(6) . 6_565 ? 
C20_1 C5_1 C4_1 120.8(9) . . ? 
C20_1 C5_1 C6_1 115.6(9) . . ? 
C4_1 C5_1 C6_1 113.9(8) . . ? 
C20_1 C5_1 Sm1 91.6(5) . . ? 
C4_1 C5_1 Sm1 69.8(4) . . ? 
C6_1 C5_1 Sm1 77.4(4) . . ? 
C5_1 C6_1 C1_1 118.1(10) . . ? 
C5_1 C6_1 C7_1 123.7(9) . . ? 
C1_1 C6_1 C7_1 107.5(9) . . ? 
C5_1 C6_1 Sm1 72.0(4) . . ? 
C1_1 C6_1 Sm1 74.2(8) . . ? 
C7_1 C6_1 Sm1 91.8(4) . . ? 
C6_1 C7_1 C22_1 119.5(8) . . ? 
C6_1 C7_1 C8_1 114.9(7) . . ? 
C22_1 C7_1 C8_1 115.5(6) . . ? 
C8_1 C9_1 C1_1 117.6(9) . . ? 
C8_1 C9_1 C10_1 109.1(6) . . ? 
C1_1 C9_1 C10_1 122.0(8) . . ? 
C27_1 C10_1 C11_1 114.2(9) . . ? 
C27_1 C10_1 C9_1 122.8(8) . . ? 
C11_1 C10_1 C9_1 116.6(7) . . ? 
C12_1 C11_1 C30_1 111.6(8) . . ? 
C12_1 C11_1 C10_1 115.5(7) . . ? 
C30_1 C11_1 C10_1 121.3(8) . . ? 
C2_1 C12_1 C11_1 129.3(9) . . ? 
C2_1 C12_1 C13_1 116.9(8) . . ? 
C11_1 C12_1 C13_1 105.9(7) . . ? 
C2_1 C12_1 Sm6 72.7(4) . 6_565 ? 
C11_1 C12_1 Sm6 96.5(5) . 6_565 ? 
C13_1 C12_1 Sm6 73.3(4) . 6_565 ? 
C14_1 C13_1 C31_1 118.5(8) . . ? 
C14_1 C13_1 C12_1 124.4(8) . . ? 
C31_1 C13_1 C12_1 107.0(7) . . ? 
C14_1 C13_1 Sm6 68.1(5) . 6_565 ? 
C31_1 C13_1 Sm6 99.0(5) . 6_565 ? 
C12_1 C13_1 Sm6 75.2(4) . 6_565 ? 
C13_1 C14_1 C34_1 126.4(9) . . ? 
C13_1 C14_1 C15_1 116.9(8) . . ? 
C34_1 C14_1 C15_1 112.9(7) . . ? 
C13_1 C14_1 Sm6 82.4(5) . 6_565 ? 
C34_1 C14_1 Sm6 94.4(6) . 6_565 ? 
C15_1 C14_1 Sm6 73.1(4) . 6_565 ? 
C14_1 C15_1 C3_1 120.6(7) . . ? 
C14_1 C15_1 C16_1 120.6(7) . . ? 
C3_1 C15_1 C16_1 112.3(6) . . ? 
C14_1 C15_1 Sm6 73.6(4) . 6_565 ? 
C3_1 C15_1 Sm6 79.2(5) . 6_565 ? 
C16_1 C15_1 Sm6 92.7(4) . 6_565 ? 
C14_1 C15_1 Sm1 89.7(4) . . ? 
C3_1 C15_1 Sm1 68.9(5) . . ? 
C16_1 C15_1 Sm1 85.5(3) . . ? 
C36_1 C16_1 C17_1 127.0(7) . . ? 
C36_1 C16_1 C15_1 123.0(6) . . ? 
C17_1 C16_1 C15_1 103.5(7) . . ? 
C36_1 C16_1 Sm6 94.6(4) . 6_565 ? 
C17_1 C16_1 Sm6 89.6(6) . 6_565 ? 
C15_1 C16_1 Sm6 57.6(3) . 6_565 ? 
C36_1 C16_1 Sm1 101.0(4) . . ? 
C17_1 C16_1 Sm1 75.1(6) . . ? 
C15_1 C16_1 Sm1 65.0(3) . . ? 
C16_1 C17_1 C18_1 112.5(8) . . ? 
C16_1 C17_1 C4_1 108.5(9) . . ? 
C18_1 C17_1 C4_1 118.1(9) . . ? 
C16_1 C17_1 Sm1 76.2(6) . . ? 
C18_1 C17_1 Sm1 88.2(6) . . ? 
C4_1 C17_1 Sm1 59.2(5) . . ? 
C38_1 C18_1 C19_1 116.4(8) . . ? 
C38_1 C18_1 C17_1 119.8(8) . . ? 
C19_1 C18_1 C17_1 118.7(8) . . ? 
C41_1 C19_1 C20_1 108.9(8) . . ? 
C41_1 C19_1 C18_1 121.4(9) . . ? 
C20_1 C19_1 C18_1 117.9(9) . . ? 
C5_1 C20_1 C19_1 124.7(10) . . ? 
C5_1 C20_1 C21_1 119.9(9) . . ? 
C19_1 C20_1 C21_1 108.5(8) . . ? 
C22_1 C21_1 C42_1 118.2(9) . . ? 
C22_1 C21_1 C20_1 126.3(8) . . ? 
C42_1 C21_1 C20_1 104.0(8) . . ? 
C21_1 C22_1 C23_1 123.3(8) . . ? 
C21_1 C22_1 C7_1 113.7(8) . . ? 
C23_1 C22_1 C7_1 117.9(8) . . ? 
C21_1 C22_1 Sm2 99.9(5) . 6_565 ? 
C23_1 C22_1 Sm2 59.2(6) . 6_565 ? 
C7_1 C22_1 Sm2 90.2(4) . 6_565 ? 
C21_1 C22_1 Sm4 92.9(5) . 6_565 ? 
C23_1 C22_1 Sm4 58.7(6) . 6_565 ? 
C7_1 C22_1 Sm4 98.2(4) . 6_565 ? 
C24_1 C23_1 C22_1 123.0(8) . . ? 
C24_1 C23_1 C44_1 112.0(8) . . ? 
C22_1 C23_1 C44_1 117.7(9) . . ? 
C24_1 C23_1 Sm2 70.2(6) . 6_565 ? 
C22_1 C23_1 Sm2 90.8(6) . 6_565 ? 
C44_1 C23_1 Sm2 81.5(6) . 6_565 ? 
C24_1 C23_1 Sm4 77.8(7) . 6_565 ? 
C22_1 C23_1 Sm4 92.8(7) . 6_565 ? 
C44_1 C23_1 Sm4 71.4(6) . 6_565 ? 
C24_1 C23_1 Sm5 71.5(6) . . ? 
C22_1 C23_1 Sm5 98.3(7) . . ? 
C44_1 C23_1 Sm5 72.4(6) . . ? 
C24_1 C23_1 Sm3 90.5(7) . 6_565 ? 
C22_1 C23_1 Sm3 88.5(6) . 6_565 ? 
C44_1 C23_1 Sm3 63.0(5) . 6_565 ? 
C47_1 C24_1 C25_1 117.3(10) . . ? 
C47_1 C24_1 C23_1 119.6(9) . . ? 
C25_1 C24_1 C23_1 116.8(9) . . ? 
C47_1 C24_1 Sm2 82.3(5) . 6_565 ? 
C25_1 C24_1 Sm2 87.1(5) . 6_565 ? 
C23_1 C24_1 Sm2 75.6(7) . 6_565 ? 
C47_1 C24_1 Sm4 79.2(5) . 6_565 ? 
C25_1 C24_1 Sm4 96.0(5) . 6_565 ? 
C23_1 C24_1 Sm4 70.5(7) . 6_565 ? 
C47_1 C24_1 Sm5 72.1(5) . . ? 
C25_1 C24_1 Sm5 94.6(5) . . ? 
C23_1 C24_1 Sm5 78.9(7) . . ? 
C8_1 C25_1 C26_1 115.0(9) . . ? 
C8_1 C25_1 C24_1 122.6(9) . . ? 
C26_1 C25_1 C24_1 118.2(10) . . ? 
C8_1 C25_1 Sm2 93.3(5) . 6_565 ? 
C26_1 C25_1 Sm2 96.4(6) . 6_565 ? 
C24_1 C25_1 Sm2 61.4(4) . 6_565 ? 
C49_1 C26_1 C25_1 119.4(9) . . ? 
C49_1 C26_1 C27_1 108.6(9) . . ? 
C25_1 C26_1 C27_1 121.8(9) . . ? 
C10_1 C27_1 C28_1 121.1(8) . . ? 
C10_1 C27_1 C26_1 117.7(8) . . ? 
C28_1 C27_1 C26_1 111.3(9) . . ? 
C29_1 C28_1 C27_1 124.9(9) . . ? 
C29_1 C28_1 C50_1 122.5(9) . . ? 
C27_1 C28_1 C50_1 102.1(7) . . ? 
C28_1 C29_1 C30_1 117.0(8) . . ? 
C28_1 C29_1 C53_1 119.6(8) . . ? 
C30_1 C29_1 C53_1 115.7(7) . . ? 
C29_1 C30_1 C31_1 122.3(8) . . ? 
C29_1 C30_1 C11_1 120.7(7) . . ? 
C31_1 C30_1 C11_1 106.5(8) . . ? 
C32_1 C31_1 C30_1 121.0(8) . . ? 
C32_1 C31_1 C13_1 120.1(7) . . ? 
C30_1 C31_1 C13_1 108.8(9) . . ? 
C31_1 C32_1 C54_1 117.9(9) . . ? 
C31_1 C32_1 C33_1 121.0(7) . . ? 
C54_1 C32_1 C33_1 110.0(8) . . ? 
C31_1 C32_1 Sm6 96.0(5) . . ? 
C54_1 C32_1 Sm6 77.9(5) . . ? 
C33_1 C32_1 Sm6 62.1(4) . . ? 
C56_1 C33_1 C32_1 108.5(9) . . ? 
C56_1 C33_1 C34_1 119.3(8) . . ? 
C32_1 C33_1 C34_1 121.0(7) . . ? 
C56_1 C33_1 Sm6 71.0(5) . . ? 
C32_1 C33_1 Sm6 89.1(5) . . ? 
C34_1 C33_1 Sm6 76.8(4) . . ? 
C14_1 C34_1 C35_1 126.9(7) . . ? 
C14_1 C34_1 C33_1 112.6(8) . . ? 
C35_1 C34_1 C33_1 115.3(7) . . ? 
C14_1 C34_1 Sm6 94.6(5) . . ? 
C35_1 C34_1 Sm6 81.0(4) . . ? 
C33_1 C34_1 Sm6 70.6(4) . . ? 
C14_1 C34_1 Sm6 57.4(5) . 6_565 ? 
C35_1 C34_1 Sm6 93.2(4) . 6_565 ? 
C33_1 C34_1 Sm6 99.2(4) . 6_565 ? 
C58_1 C35_1 C34_1 122.0(8) . . ? 
C58_1 C35_1 C36_1 116.7(8) . . ? 
C34_1 C35_1 C36_1 116.9(7) . . ? 
C58_1 C35_1 Sm6 79.6(5) . . ? 
C34_1 C35_1 Sm6 69.2(4) . . ? 
C36_1 C35_1 Sm6 102.4(4) . . ? 
C16_1 C36_1 C37_1 117.4(10) . . ? 
C16_1 C36_1 C35_1 119.3(7) . . ? 
C37_1 C36_1 C35_1 117.9(11) . . ? 
C60_1 C37_1 C36_1 123.7(9) . . ? 
C60_1 C37_1 C38_1 104.8(7) . . ? 
C36_1 C37_1 C38_1 119.5(10) . . ? 
C18_1 C38_1 C39_1 117.5(9) . . ? 
C18_1 C38_1 C37_1 121.1(8) . . ? 
C39_1 C38_1 C37_1 112.5(9) . . ? 
C40_1 C39_1 C38_1 129.5(12) . . ? 
C40_1 C39_1 C61_1 115.8(10) . . ? 
C38_1 C39_1 C61_1 103.2(7) . . ? 
C39_1 C40_1 C41_1 112.4(10) . . ? 
C39_1 C40_1 C64_1 124.0(9) . . ? 
C41_1 C40_1 C64_1 116.7(7) . . ? 
C40_1 C41_1 C19_1 121.0(9) . . ? 
C40_1 C41_1 C42_1 121.7(9) . . ? 
C19_1 C41_1 C42_1 107.8(8) . . ? 
C43_1 C42_1 C41_1 118.2(8) . . ? 
C43_1 C42_1 C21_1 122.2(10) . . ? 
C41_1 C42_1 C21_1 110.7(8) . . ? 
C43_1 C42_1 Sm3 61.8(4) . 6_565 ? 
C41_1 C42_1 Sm3 90.3(5) . 6_565 ? 
C21_1 C42_1 Sm3 90.2(5) . 6_565 ? 
C42_1 C43_1 C65_1 121.6(9) . . ? 
C42_1 C43_1 C44_1 121.6(8) . . ? 
C65_1 C43_1 C44_1 107.3(8) . . ? 
C42_1 C43_1 Sm3 90.7(4) . 6_565 ? 
C65_1 C43_1 Sm3 73.1(3) . 6_565 ? 
C44_1 C43_1 Sm3 74.0(4) . 6_565 ? 
C42_1 C43_1 Sm3 95.4(4) . . ? 
C65_1 C43_1 Sm3 67.0(3) . . ? 
C44_1 C43_1 Sm3 75.1(4) . . ? 
C42_1 C43_1 Sm4 93.8(4) . 6_565 ? 
C65_1 C43_1 Sm4 82.0(4) . 6_565 ? 
C44_1 C43_1 Sm4 61.8(4) . 6_565 ? 
C45_1 C44_1 C43_1 110.6(10) . . ? 
C45_1 C44_1 C23_1 121.6(10) . . ? 
C43_1 C44_1 C23_1 116.8(8) . . ? 
C45_1 C44_1 Sm4 74.8(5) . 6_565 ? 
C43_1 C44_1 Sm4 88.0(4) . 6_565 ? 
C23_1 C44_1 Sm4 75.0(6) . 6_565 ? 
C45_1 C44_1 Sm3 76.7(5) . 6_565 ? 
C43_1 C44_1 Sm3 73.2(4) . 6_565 ? 
C23_1 C44_1 Sm3 86.1(6) . 6_565 ? 
C45_1 C44_1 Sm2 78.6(5) . 6_565 ? 
C43_1 C44_1 Sm2 95.1(4) . 6_565 ? 
C23_1 C44_1 Sm2 65.6(6) . 6_565 ? 
C45_1 C44_1 Sm3 70.8(5) . . ? 
C43_1 C44_1 Sm3 74.2(4) . . ? 
C23_1 C44_1 Sm3 91.2(6) . . ? 
C45_1 C44_1 Sm5 68.1(4) . . ? 
C43_1 C44_1 Sm5 93.0(4) . . ? 
C23_1 C44_1 Sm5 77.3(6) . . ? 
C45_1 C44_1 Sm4 63.6(4) . . ? 
C43_1 C44_1 Sm4 88.0(4) . . ? 
C23_1 C44_1 Sm4 85.7(6) . . ? 
C44_1 C45_1 C46_1 130.3(13) . . ? 
C44_1 C45_1 C66_1 109.9(11) . . ? 
C46_1 C45_1 C66_1 110.3(16) . . ? 
C44_1 C45_1 Sm4 75.9(5) . 6_565 ? 
C46_1 C45_1 Sm4 81.0(4) . 6_565 ? 
C66_1 C45_1 Sm4 83.1(4) . 6_565 ? 
C44_1 C45_1 Sm4 89.7(5) . . ? 
C46_1 C45_1 Sm4 75.0(5) . . ? 
C66_1 C45_1 Sm4 73.2(4) . . ? 
C44_1 C45_1 Sm3 74.5(5) . 6_565 ? 
C46_1 C45_1 Sm3 93.1(5) . 6_565 ? 
C66_1 C45_1 Sm3 69.9(4) . 6_565 ? 
C44_1 C45_1 Sm5 84.7(5) . . ? 
C46_1 C45_1 Sm5 72.7(4) . . ? 
C66_1 C45_1 Sm5 82.4(4) . . ? 
C44_1 C45_1 Sm3 81.6(5) . . ? 
C46_1 C45_1 Sm3 90.0(5) . . ? 
C66_1 C45_1 Sm3 64.7(4) . . ? 
C44_1 C45_1 Sm2 74.1(5) . 6_565 ? 
C46_1 C45_1 Sm2 76.2(4) . 6_565 ? 
C66_1 C45_1 Sm2 92.1(4) . 6_565 ? 
C44_1 C45_1 Sm2 96.3(5) . . ? 
C46_1 C45_1 Sm2 66.4(4) . . ? 
C66_1 C45_1 Sm2 76.3(5) . . ? 
C45_1 C46_1 C69_1 121.7(14) . . ? 
C45_1 C46_1 C47_1 108.1(11) . . ? 
C69_1 C46_1 C47_1 120.9(11) . . ? 
C45_1 C46_1 Sm5 77.1(4) . . ? 
C69_1 C46_1 Sm5 83.3(5) . . ? 
C47_1 C46_1 Sm5 78.5(4) . . ? 
C45_1 C46_1 Sm4 74.6(4) . . ? 
C69_1 C46_1 Sm4 77.4(5) . . ? 
C47_1 C46_1 Sm4 88.0(4) . . ? 
C45_1 C46_1 Sm2 85.2(4) . . ? 
C69_1 C46_1 Sm2 70.1(5) . . ? 
C47_1 C46_1 Sm2 85.7(4) . . ? 
C45_1 C46_1 Sm4 69.1(4) . 6_565 ? 
C69_1 C46_1 Sm4 91.3(5) . 6_565 ? 
C47_1 C46_1 Sm4 77.9(4) . 6_565 ? 
C45_1 C46_1 Sm2 75.5(5) . 6_565 ? 
C69_1 C46_1 Sm2 94.2(5) . 6_565 ? 
C47_1 C46_1 Sm2 68.2(4) . 6_565 ? 
C45_1 C46_1 Sm3 62.8(4) . . ? 
C69_1 C46_1 Sm3 83.2(6) . . ? 
C47_1 C46_1 Sm3 94.0(4) . . ? 
C45_1 C46_1 Sm3 60.2(4) . 6_565 ? 
C69_1 C46_1 Sm3 89.5(6) . 6_565 ? 
C47_1 C46_1 Sm3 89.3(4) . 6_565 ? 
C24_1 C47_1 C48_1 124.5(11) . . ? 
C24_1 C47_1 C46_1 126.8(9) . . ? 
C48_1 C47_1 C46_1 97.8(10) . . ? 
C24_1 C47_1 Sm2 67.0(4) . 6_565 ? 
C48_1 C47_1 Sm2 94.6(4) . 6_565 ? 
C46_1 C47_1 Sm2 80.2(4) . 6_565 ? 
C24_1 C47_1 Sm5 79.5(4) . . ? 
C48_1 C47_1 Sm5 89.7(5) . . ? 
C46_1 C47_1 Sm5 69.1(4) . . ? 
C24_1 C47_1 Sm4 72.4(4) . 6_565 ? 
C48_1 C47_1 Sm4 98.1(5) . 6_565 ? 
C46_1 C47_1 Sm4 70.9(4) . 6_565 ? 
C24_1 C47_1 Sm2 90.6(4) . . ? 
C48_1 C47_1 Sm2 80.6(5) . . ? 
C46_1 C47_1 Sm2 63.8(4) . . ? 
C24_1 C47_1 Sm4 85.3(5) . . ? 
C48_1 C47_1 Sm4 90.0(5) . . ? 
C46_1 C47_1 Sm4 61.9(4) . . ? 
C49_1 C48_1 C70_1 124.1(11) . . ? 
C49_1 C48_1 C47_1 114.7(12) . . ? 
C70_1 C48_1 C47_1 109.6(11) . . ? 
C49_1 C48_1 Sm2 97.4(4) . . ? 
C70_1 C48_1 Sm2 66.5(5) . . ? 
C47_1 C48_1 Sm2 71.2(4) . . ? 
C49_1 C48_1 Sm5 95.3(5) . . ? 
C70_1 C48_1 Sm5 76.9(5) . . ? 
C47_1 C48_1 Sm5 62.0(4) . . ? 
C48_1 C49_1 C26_1 125.7(9) . . ? 
C48_1 C49_1 C50_1 118.5(9) . . ? 
C26_1 C49_1 C50_1 107.4(8) . . ? 
C51_1 C50_1 C28_1 120.2(10) . . ? 
C51_1 C50_1 C49_1 117.9(10) . . ? 
C28_1 C50_1 C49_1 110.5(8) . . ? 
C50_1 C51_1 C52_1 115.9(11) . . ? 
C50_1 C51_1 C71_1 121.6(12) . . ? 
C52_1 C51_1 C71_1 113.3(10) . . ? 
C73_1 C52_1 C53_1 115.8(7) . . ? 
C73_1 C52_1 C51_1 105.6(9) . . ? 
C53_1 C52_1 C51_1 127.7(9) . . ? 
C54_1 C53_1 C52_1 117.7(8) . . ? 
C54_1 C53_1 C29_1 119.5(8) . . ? 
C52_1 C53_1 C29_1 114.0(8) . . ? 
C53_1 C54_1 C32_1 123.6(10) . . ? 
C53_1 C54_1 C55_1 121.0(8) . . ? 
C32_1 C54_1 C55_1 107.3(8) . . ? 
C53_1 C54_1 Sm6 99.3(5) . . ? 
C32_1 C54_1 Sm6 74.8(5) . . ? 
C55_1 C54_1 Sm6 65.5(4) . . ? 
C74_1 C55_1 C54_1 126.5(9) . . ? 
C74_1 C55_1 C56_1 120.0(8) . . ? 
C54_1 C55_1 C56_1 101.8(8) . . ? 
C74_1 C55_1 Sm6 83.5(6) . . ? 
C54_1 C55_1 Sm6 86.0(5) . . ? 
C56_1 C55_1 Sm6 64.9(4) . . ? 
C74_1 C55_1 Sm1 69.6(5) . 6_565 ? 
C54_1 C55_1 Sm1 99.8(4) . 6_565 ? 
C56_1 C55_1 Sm1 69.0(3) . 6_565 ? 
C33_1 C56_1 C57_1 125.5(11) . . ? 
C33_1 C56_1 C55_1 112.0(9) . . ? 
C57_1 C56_1 C55_1 113.4(10) . . ? 
C33_1 C56_1 Sm6 80.7(6) . . ? 
C57_1 C56_1 Sm6 78.0(8) . . ? 
C55_1 C56_1 Sm6 81.2(4) . . ? 
C33_1 C56_1 Sm1 96.3(5) . 6_565 ? 
C57_1 C56_1 Sm1 64.9(7) . 6_565 ? 
C55_1 C56_1 Sm1 79.2(4) . 6_565 ? 
C56_1 C57_1 C76_1 124.3(12) . . ? 
C56_1 C57_1 C58_1 118.1(12) . . ? 
C76_1 C57_1 C58_1 113.1(10) . . ? 
C56_1 C57_1 Sm1 85.6(8) . 6_565 ? 
C76_1 C57_1 Sm1 74.4(7) . 6_565 ? 
C58_1 C57_1 Sm1 89.3(7) . 6_565 ? 
C56_1 C57_1 Sm6 71.4(7) . . ? 
C76_1 C57_1 Sm6 90.8(8) . . ? 
C58_1 C57_1 Sm6 87.6(7) . . ? 
C35_1 C58_1 C59_1 119.7(10) . . ? 
C35_1 C58_1 C57_1 117.4(9) . . ? 
C59_1 C58_1 C57_1 105.2(10) . . ? 
C35_1 C58_1 Sm1 86.9(4) . 6_565 ? 
C59_1 C58_1 Sm1 79.4(8) . 6_565 ? 
C57_1 C58_1 Sm1 59.9(7) . 6_565 ? 
C35_1 C58_1 Sm6 73.8(4) . . ? 
C59_1 C58_1 Sm6 92.8(8) . . ? 
C57_1 C58_1 Sm6 62.2(7) . . ? 
C60_1 C59_1 C77_1 130.6(11) . . ? 
C60_1 C59_1 C58_1 122.5(12) . . ? 
C77_1 C59_1 C58_1 104.4(10) . . ? 
C60_1 C59_1 Sm1 108.0(8) . 6_565 ? 
C77_1 C59_1 Sm1 70.6(7) . 6_565 ? 
C58_1 C59_1 Sm1 71.9(7) . 6_565 ? 
C59_1 C60_1 C37_1 116.9(8) . . ? 
C59_1 C60_1 C61_1 114.9(9) . . ? 
C37_1 C60_1 C61_1 112.6(7) . . ? 
C62_1 C61_1 C60_1 119.7(8) . . ? 
C62_1 C61_1 C39_1 121.5(8) . . ? 
C60_1 C61_1 C39_1 106.6(6) . . ? 
C61_1 C62_1 C63_1 123.3(10) . . ? 
C61_1 C62_1 C78_1 117.8(10) . . ? 
C63_1 C62_1 C78_1 109.2(9) . . ? 
C80_1 C63_1 C64_1 129.3(11) . . ? 
C80_1 C63_1 C62_1 106.8(9) . . ? 
C64_1 C63_1 C62_1 115.9(10) . . ? 
C80_1 C63_1 Sm3 73.7(6) . . ? 
C64_1 C63_1 Sm3 68.9(5) . . ? 
C62_1 C63_1 Sm3 106.8(6) . . ? 
C65_1 C64_1 C63_1 116.1(8) . . ? 
C65_1 C64_1 C40_1 117.6(6) . . ? 
C63_1 C64_1 C40_1 119.3(8) . . ? 
C65_1 C64_1 Sm3 64.7(3) . . ? 
C63_1 C64_1 Sm3 82.5(5) . . ? 
C40_1 C64_1 Sm3 96.4(3) . . ? 
C65_1 C64_1 Sm3 62.4(3) . 6_565 ? 
C63_1 C64_1 Sm3 89.1(5) . 6_565 ? 
C40_1 C64_1 Sm3 92.0(3) . 6_565 ? 
C67_1 C66_1 C65_1 128.0(10) . . ? 
C67_1 C66_1 C45_1 120.3(12) . . ? 
C65_1 C66_1 C45_1 100.9(9) . . ? 
C67_1 C66_1 Sm3 80.0(4) . . ? 
C65_1 C66_1 Sm3 77.8(4) . . ? 
C45_1 C66_1 Sm3 79.6(4) . . ? 
C67_1 C66_1 Sm3 87.3(4) . 6_565 ? 
C65_1 C66_1 Sm3 73.5(3) . 6_565 ? 
C45_1 C66_1 Sm3 74.9(4) . 6_565 ? 
C67_1 C66_1 Sm4 74.2(4) . . ? 
C65_1 C66_1 Sm4 92.2(4) . . ? 
C45_1 C66_1 Sm4 71.7(4) . . ? 
C67_1 C66_1 Sm4 87.4(5) . 6_565 ? 
C65_1 C66_1 Sm4 83.9(4) . 6_565 ? 
C45_1 C66_1 Sm4 63.5(4) . 6_565 ? 
C67_1 C66_1 Sm5 79.9(4) . . ? 
C65_1 C66_1 Sm5 91.8(4) . . ? 
C45_1 C66_1 Sm5 65.0(4) . . ? 
C67_1 C66_1 Sm2 68.1(4) . . ? 
C65_1 C66_1 Sm2 100.0(4) . . ? 
C45_1 C66_1 Sm2 72.1(4) . . ? 
C66_1 C67_1 C68_1 128.2(11) . . ? 
C66_1 C67_1 C80_1 116.9(11) . . ? 
C68_1 C67_1 C80_1 109.0(10) . . ? 
C66_1 C67_1 Sm3 68.0(4) . . ? 
C68_1 C67_1 Sm3 91.3(6) . . ? 
C80_1 C67_1 Sm3 88.6(5) . . ? 
C66_1 C67_1 Sm4 75.0(5) . . ? 
C68_1 C67_1 Sm4 76.6(6) . . ? 
C80_1 C67_1 Sm4 97.5(5) . . ? 
C66_1 C67_1 Sm2 83.6(5) . . ? 
C68_1 C67_1 Sm2 66.6(6) . . ? 
C80_1 C67_1 Sm2 98.6(5) . . ? 
C66_1 C67_1 Sm3 63.6(4) . 6_565 ? 
C68_1 C67_1 Sm3 93.6(6) . 6_565 ? 
C80_1 C67_1 Sm3 91.5(5) . 6_565 ? 
C66_1 C67_1 Sm5 72.7(5) . . ? 
C68_1 C67_1 Sm5 75.5(6) . . ? 
C80_1 C67_1 Sm5 102.1(5) . . ? 
C69_1 C68_1 C82_1 121.2(11) . . ? 
C69_1 C68_1 C67_1 103.3(10) . . ? 
C82_1 C68_1 C67_1 128.4(9) . . ? 
C69_1 C68_1 Sm2 73.9(7) . . ? 
C82_1 C68_1 Sm2 87.0(6) . . ? 
C67_1 C68_1 Sm2 81.2(6) . . ? 
C69_1 C68_1 Sm4 75.0(7) . . ? 
C82_1 C68_1 Sm4 94.9(6) . . ? 
C67_1 C68_1 Sm4 71.3(6) . . ? 
C69_1 C68_1 Sm5 69.3(7) . . ? 
C82_1 C68_1 Sm5 95.4(6) . . ? 
C67_1 C68_1 Sm5 76.0(6) . . ? 
C69_1 C68_1 Sm3 82.9(7) . . ? 
C82_1 C68_1 Sm3 99.2(6) . . ? 
C67_1 C68_1 Sm3 59.5(5) . . ? 
C68_1 C69_1 C46_1 133.4(13) . . ? 
C68_1 C69_1 C70_1 119.3(11) . . ? 
C46_1 C69_1 C70_1 93.8(11) . . ? 
C68_1 C69_1 Sm2 74.4(7) . . ? 
C46_1 C69_1 Sm2 78.1(5) . . ? 
C70_1 C69_1 Sm2 83.8(5) . . ? 
C68_1 C69_1 Sm4 75.2(7) . . ? 
C46_1 C69_1 Sm4 71.6(5) . . ? 
C70_1 C69_1 Sm4 92.0(5) . . ? 
C68_1 C69_1 Sm5 83.3(7) . . ? 
C46_1 C69_1 Sm5 66.6(5) . . ? 
C70_1 C69_1 Sm5 85.4(6) . . ? 
C68_1 C69_1 Sm4 85.3(8) . 6_565 ? 
C46_1 C69_1 Sm4 61.4(5) . 6_565 ? 
C70_1 C69_1 Sm4 89.7(6) . 6_565 ? 
C48_1 C70_1 C71_1 121.8(12) . . ? 
C48_1 C70_1 C69_1 116.7(11) . . ? 
C71_1 C70_1 C69_1 113.0(11) . . ? 
C48_1 C70_1 Sm2 86.9(5) . . ? 
C71_1 C70_1 Sm2 89.0(6) . . ? 
C69_1 C70_1 Sm2 64.0(5) . . ? 
C48_1 C70_1 Sm5 77.5(5) . . ? 
C71_1 C70_1 Sm5 97.9(6) . . ? 
C69_1 C70_1 Sm5 65.5(5) . . ? 
C70_1 C71_1 C51_1 115.8(11) . . ? 
C70_1 C71_1 C8_1 129.0(10) . 6_565 ? 
C51_1 C71_1 C8_1 100.9(8) . 6_565 ? 
C52_1 C73_1 C74_1 132.4(9) . . ? 
C52_1 C73_1 C8_1 114.8(7) . 6_565 ? 
C74_1 C73_1 C8_1 107.0(7) . 6_565 ? 
C55_1 C74_1 C73_1 105.8(9) . . ? 
C55_1 C74_1 C75_1 121.1(9) . . ? 
C73_1 C74_1 C75_1 125.5(9) . . ? 
C55_1 C74_1 Sm1 82.5(5) . 6_565 ? 
C73_1 C74_1 Sm1 98.4(7) . 6_565 ? 
C75_1 C74_1 Sm1 64.6(5) . 6_565 ? 
C55_1 C74_1 Sm6 69.0(5) . . ? 
C73_1 C74_1 Sm6 95.3(7) . . ? 
C75_1 C74_1 Sm6 78.6(6) . . ? 
C76_1 C75_1 C74_1 116.3(9) . . ? 
C76_1 C75_1 C81_1 122.3(9) . . ? 
C74_1 C75_1 C81_1 115.1(9) . . ? 
C76_1 C75_1 Sm1 75.2(5) . 6_565 ? 
C74_1 C75_1 Sm1 83.3(6) . 6_565 ? 
C81_1 C75_1 Sm1 86.6(6) . 6_565 ? 
C76_1 C75_1 Sm6 75.4(5) . . ? 
C74_1 C75_1 Sm6 72.8(6) . . ? 
C81_1 C75_1 Sm6 96.6(6) . . ? 
C75_1 C76_1 C57_1 122.5(10) . . ? 
C75_1 C76_1 C77_1 123.6(9) . . ? 
C57_1 C76_1 C77_1 99.5(9) . . ? 
C75_1 C76_1 Sm1 73.4(6) . 6_565 ? 
C57_1 C76_1 Sm1 73.4(7) . 6_565 ? 
C77_1 C76_1 Sm1 86.6(4) . 6_565 ? 
C75_1 C76_1 Sm6 78.4(6) . . ? 
C57_1 C76_1 Sm6 61.2(7) . . ? 
C77_1 C76_1 Sm6 93.7(4) . . ? 
C59_1 C77_1 C78_1 114.3(8) . . ? 
C59_1 C77_1 C76_1 116.8(8) . . ? 
C78_1 C77_1 C76_1 115.5(8) . . ? 
C59_1 C77_1 Sm1 82.7(8) . 6_565 ? 
C78_1 C77_1 Sm1 89.2(4) . 6_565 ? 
C76_1 C77_1 Sm1 62.0(3) . 6_565 ? 
C77_1 C78_1 C62_1 121.6(10) . . ? 
C77_1 C78_1 C79_1 118.3(8) . . ? 
C62_1 C78_1 C79_1 107.4(8) . . ? 
C81_1 C79_1 C80_1 124.6(10) . . ? 
C81_1 C79_1 C78_1 125.1(9) . . ? 
C80_1 C79_1 C78_1 100.0(7) . . ? 
C63_1 C80_1 C67_1 113.1(11) . . ? 
C63_1 C80_1 C79_1 116.1(8) . . ? 
C67_1 C80_1 C79_1 122.5(11) . . ? 
C63_1 C80_1 Sm3 78.8(6) . . ? 
C67_1 C80_1 Sm3 61.5(4) . . ? 
C79_1 C80_1 Sm3 101.4(5) . . ? 
C79_1 C81_1 C75_1 114.6(9) . . ? 
C79_1 C81_1 C82_1 117.4(10) . . ? 
C75_1 C81_1 C82_1 122.9(9) . . ? 
C79_1 C81_1 Sm1 88.9(5) . 6_565 ? 
C75_1 C81_1 Sm1 61.8(5) . 6_565 ? 
C82_1 C81_1 Sm1 97.2(5) . 6_565 ? 
C8_1 C82_1 C68_1 127.7(10) 6_565 . ? 
C8_1 C82_1 C81_1 110.3(8) 6_565 . ? 
C68_1 C82_1 C81_1 116.5(9) . . ? 
C8_1 C82_1 Sm2 90.6(4) 6_565 . ? 
C68_1 C82_1 Sm2 62.2(6) . . ? 
C81_1 C82_1 Sm2 97.2(6) . . ? 
C82_1 C8_1 C25_1 93.1(7) 6_565 . ? 
C25_1 C8_1 C73_1 116.8(7) . 6_565 ? 
C82_1 C8_1 C9_1 125.3(8) 6_565 . ? 
C25_1 C8_1 C9_1 132.4(7) . . ? 
C25_1 C8_1 C7_1 124.0(6) . . ? 
C73_1 C8_1 C7_1 110.7(6) 6_565 . ? 
C9_1 C8_1 C7_1 96.4(6) . . ? 
C64_1 C65_1 C43_1 123.9(7) . . ? 
C64_1 C65_1 C43_1 123.9(7) 6_565 6_565 ? 
C64_1 C65_1 C66_1 115.1(5) . . ? 
C43_1 C65_1 C66_1 111.0(8) . . ? 
C64_1 C65_1 C66_1 115.1(5) 6_565 6_565 ? 
C43_1 C65_1 C66_1 111.0(8) 6_565 6_565 ? 
C6_2 C1_2 C2_2 129.2 . . ? 
C6_2 C1_2 C9_2 105.3 . . ? 
C2_2 C1_2 C9_2 110.4 . . ? 
C12_2 C2_2 C3_2 124.0 . . ? 
C12_2 C2_2 C1_2 119.1 . . ? 
C3_2 C2_2 C1_2 108.6 . . ? 
C2_2 C3_2 C4_2 123.6 . . ? 
C2_2 C3_2 C15_2 117.2 . . ? 
C4_2 C3_2 C15_2 104.6 . . ? 
C2_2 C3_2 Sm3 97.2(2) . 6_565 ? 
C4_2 C3_2 Sm3 79.2(2) . 6_565 ? 
C15_2 C3_2 Sm3 52.30(19) . 6_565 ? 
C65_1 C3_2 Sm3 58.5(3) . 6_565 ? 
C2_2 C3_2 Sm3 93.3(2) . . ? 
C4_2 C3_2 Sm3 85.7(2) . . ? 
C15_2 C3_2 Sm3 49.95(19) . . ? 
C65_1 C3_2 Sm3 57.7(3) . . ? 
C3_2 C4_2 C5_2 125.7 . . ? 
C3_2 C4_2 C17_2 111.1 . . ? 
C5_2 C4_2 C17_2 115.1 . . ? 
C3_2 C4_2 Sm3 73.0(2) . 6_565 ? 
C5_2 C4_2 Sm3 100.13(18) . 6_565 ? 
C17_2 C4_2 Sm3 67.2(2) . 6_565 ? 
C20_2 C5_2 C6_2 116.5 . . ? 
C20_2 C5_2 C4_2 121.6 . . ? 
C6_2 C5_2 C4_2 111.6 . . ? 
C5_2 C6_2 C1_2 120.5 . . ? 
C5_2 C6_2 C7_2 124.1 . . ? 
C1_2 C6_2 C7_2 107.1 . . ? 
C22_2 C7_2 C6_2 117.1 . . ? 
C22_2 C7_2 C8_2 117.3 . . ? 
C6_2 C7_2 C8_2 114.9 . . ? 
C25_2 C8_2 C9_2 123.1 . . ? 
C25_2 C8_2 C7_2 123.6 . . ? 
C9_2 C8_2 C7_2 102.2 . . ? 
C10_2 C9_2 C8_2 120.5 . . ? 
C10_2 C9_2 C1_2 127.2 . . ? 
C8_2 C9_2 C1_2 110.0 . . ? 
C27_2 C10_2 C9_2 116.7 . . ? 
C27_2 C10_2 C11_2 119.7 . . ? 
C9_2 C10_2 C11_2 113.3 . . ? 
C12_2 C11_2 C30_2 111.3 . . ? 
C12_2 C11_2 C10_2 118.8 . . ? 
C30_2 C11_2 C10_2 118.1 . . ? 
C2_2 C12_2 C11_2 130.0 . . ? 
C2_2 C12_2 C13_2 114.0 . . ? 
C11_2 C12_2 C13_2 108.9 . . ? 
C14_2 C13_2 C12_2 127.7 . . ? 
C14_2 C13_2 C31_2 117.9 . . ? 
C12_2 C13_2 C31_2 103.9 . . ? 
C14_2 C13_2 Sm3 48.97(19) . . ? 
C12_2 C13_2 Sm3 96.1(2) . . ? 
C31_2 C13_2 Sm3 100.0(2) . . ? 
C13_2 C14_2 C34_2 128.0 . . ? 
C13_2 C14_2 C15_2 114.8 . . ? 
C34_2 C14_2 C15_2 113.4 . . ? 
C13_2 C14_2 C65_1 126.9(6) . . ? 
C34_2 C14_2 C65_1 103.5(6) . . ? 
C13_2 C14_2 Sm3 104.7(3) . . ? 
C34_2 C14_2 Sm3 72.7(3) . . ? 
C15_2 C14_2 Sm3 72.3(3) . . ? 
C65_1 C14_2 Sm3 76.0(4) . . ? 
C13_2 C14_2 Sm3 107.8(2) . 6_565 ? 
C34_2 C14_2 Sm3 75.1(2) . 6_565 ? 
C15_2 C14_2 Sm3 66.3(2) . 6_565 ? 
C65_1 C14_2 Sm3 70.0(4) . 6_565 ? 
C13_2 C14_2 Sm4 109.0(2) . . ? 
C34_2 C14_2 Sm4 59.5(2) . . ? 
C15_2 C14_2 Sm4 82.8(3) . . ? 
C65_1 C14_2 Sm4 84.2(5) . . ? 
C13_2 C14_2 Sm2 106.4(2) . . ? 
C34_2 C14_2 Sm2 54.56(19) . . ? 
C15_2 C14_2 Sm2 90.9(2) . . ? 
C65_1 C14_2 Sm2 91.9(5) . . ? 
C13_2 C14_2 Sm4 114.02(19) . 6_565 ? 
C34_2 C14_2 Sm4 65.0(2) . 6_565 ? 
C15_2 C14_2 Sm4 71.8(2) . 6_565 ? 
C65_1 C14_2 Sm4 73.3(4) . 6_565 ? 
C13_2 C14_2 Sm5 112.2(2) . . ? 
C34_2 C14_2 Sm5 59.4(2) . . ? 
C15_2 C14_2 Sm5 79.7(2) . . ? 
C65_1 C14_2 Sm5 80.7(4) . . ? 
C14_2 C15_2 C16_2 120.6 . . ? 
C14_2 C15_2 C3_2 120.1 . . ? 
C16_2 C15_2 C3_2 112.7 . . ? 
C14_2 C15_2 Sm3 71.4(3) . . ? 
C16_2 C15_2 Sm3 73.8(3) . . ? 
C3_2 C15_2 Sm3 101.1(3) . . ? 
C14_2 C15_2 Sm3 79.6(3) . 6_565 ? 
C16_2 C15_2 Sm3 67.7(3) . 6_565 ? 
C3_2 C15_2 Sm3 98.1(3) . 6_565 ? 
C14_2 C15_2 Sm4 67.1(2) . . ? 
C16_2 C15_2 Sm4 70.7(2) . . ? 
C3_2 C15_2 Sm4 110.7(2) . . ? 
C14_2 C15_2 Sm4 80.0(2) . 6_565 ? 
C16_2 C15_2 Sm4 60.7(2) . 6_565 ? 
C3_2 C15_2 Sm4 105.8(2) . 6_565 ? 
C36_2 C16_2 C15_2 121.7 . . ? 
C36_2 C16_2 C17_2 124.1 . . ? 
C15_2 C16_2 C17_2 108.0 . . ? 
C36_2 C16_2 Sm3 75.4(3) . 6_565 ? 
C15_2 C16_2 Sm3 75.2(3) . 6_565 ? 
C17_2 C16_2 Sm3 95.7(3) . 6_565 ? 
C36_2 C16_2 Sm3 74.7(3) . . ? 
C15_2 C16_2 Sm3 69.8(2) . . ? 
C17_2 C16_2 Sm3 102.5(3) . . ? 
C36_2 C16_2 Sm4 62.0(2) . 6_565 ? 
C15_2 C16_2 Sm4 88.9(3) . 6_565 ? 
C17_2 C16_2 Sm4 97.5(2) . 6_565 ? 
C36_2 C16_2 Sm4 61.7(2) . . ? 
C15_2 C16_2 Sm4 79.0(2) . . ? 
C17_2 C16_2 Sm4 109.1(2) . . ? 
C36_2 C16_2 Sm5 58.2(2) . . ? 
C15_2 C16_2 Sm5 87.1(2) . . ? 
C17_2 C16_2 Sm5 104.08(19) . . ? 
C36_2 C16_2 Sm2 58.75(19) . 6_565 ? 
C15_2 C16_2 Sm2 96.3(2) . 6_565 ? 
C17_2 C16_2 Sm2 93.9(2) . 6_565 ? 
C18_2 C17_2 C16_2 115.8 . . ? 
C18_2 C17_2 C4_2 118.3 . . ? 
C16_2 C17_2 C4_2 102.3 . . ? 
C18_2 C17_2 Sm3 85.4(2) . 6_565 ? 
C16_2 C17_2 Sm3 52.6(2) . 6_565 ? 
C4_2 C17_2 Sm3 81.4(2) . 6_565 ? 
C38_2 C18_2 C17_2 119.1 . . ? 
C38_2 C18_2 C19_2 116.1 . . ? 
C17_2 C18_2 C19_2 120.5 . . ? 
C20_2 C19_2 C41_2 108.3 . . ? 
C20_2 C19_2 C18_2 118.4 . . ? 
C41_2 C19_2 C18_2 121.8 . . ? 
C5_2 C20_2 C19_2 124.8 . . ? 
C5_2 C20_2 C21_2 118.2 . . ? 
C19_2 C20_2 C21_2 111.0 . . ? 
C5_2 C20_2 Sm1 97.64(17) . . ? 
C19_2 C20_2 Sm1 83.38(16) . . ? 
C21_2 C20_2 Sm1 62.56(17) . . ? 
C22_2 C21_2 C20_2 127.6 . . ? 
C22_2 C21_2 C42_2 116.8 . . ? 
C20_2 C21_2 C42_2 102.5 . . ? 
C22_2 C21_2 Sm1 74.84(19) . . ? 
C20_2 C21_2 Sm1 88.2(2) . . ? 
C42_2 C21_2 Sm1 70.58(19) . . ? 
C21_2 C22_2 C23_2 125.0 . . ? 
C21_2 C22_2 C7_2 114.8 . . ? 
C23_2 C22_2 C7_2 112.4 . . ? 
C21_2 C22_2 Sm1 76.1(2) . . ? 
C23_2 C22_2 Sm1 71.2(2) . . ? 
C7_2 C22_2 Sm1 97.5(2) . . ? 
C21_2 C22_2 Sm6 89.0(2) . 6_565 ? 
C23_2 C22_2 Sm6 58.1(2) . 6_565 ? 
C7_2 C22_2 Sm6 97.5(2) . 6_565 ? 
C22_2 C23_2 C24_2 132.1 . . ? 
C22_2 C23_2 C44_2 119.0 . . ? 
C24_2 C23_2 C44_2 108.3 . . ? 
C22_2 C23_2 Sm6 94.7(3) . 6_565 ? 
C24_2 C23_2 Sm6 88.7(3) . 6_565 ? 
C44_2 C23_2 Sm6 76.5(3) . 6_565 ? 
C22_2 C23_2 Sm1 78.3(2) . . ? 
C24_2 C23_2 Sm1 103.8(2) . . ? 
C44_2 C23_2 Sm1 80.0(2) . . ? 
C47_2 C24_2 C25_2 117.8 . . ? 
C47_2 C24_2 C23_2 121.5 . . ? 
C25_2 C24_2 C23_2 110.4 . . ? 
C47_2 C24_2 Sm6 83.3(3) . 6_565 ? 
C25_2 C24_2 Sm6 94.4(2) . 6_565 ? 
C23_2 C24_2 Sm6 61.3(3) . 6_565 ? 
C8_2 C25_2 C24_2 123.4 . . ? 
C8_2 C25_2 C26_2 115.0 . . ? 
C24_2 C25_2 C26_2 117.9 . . ? 
C49_2 C26_2 C25_2 120.7 . . ? 
C49_2 C26_2 C27_2 106.6 . . ? 
C25_2 C26_2 C27_2 122.4 . . ? 
C10_2 C27_2 C28_2 117.1 . . ? 
C10_2 C27_2 C26_2 120.1 . . ? 
C28_2 C27_2 C26_2 113.7 . . ? 
C10_2 C27_2 Sm1 86.8(2) . 6_565 ? 
C28_2 C27_2 Sm1 66.15(19) . 6_565 ? 
C26_2 C27_2 Sm1 86.2(2) . 6_565 ? 
C29_2 C28_2 C27_2 127.2 . . ? 
C29_2 C28_2 C50_2 122.0 . . ? 
C27_2 C28_2 C50_2 100.7 . . ? 
C29_2 C28_2 Sm1 73.4(2) . 6_565 ? 
C27_2 C28_2 Sm1 86.3(2) . 6_565 ? 
C50_2 C28_2 Sm1 80.3(2) . 6_565 ? 
C28_2 C29_2 C30_2 116.0 . . ? 
C28_2 C29_2 C53_2 118.7 . . ? 
C30_2 C29_2 C53_2 117.7 . . ? 
C28_2 C29_2 Sm1 78.5(2) . 6_565 ? 
C30_2 C29_2 Sm1 88.4(2) . 6_565 ? 
C53_2 C29_2 Sm1 75.5(2) . 6_565 ? 
C29_2 C30_2 C31_2 123.4 . . ? 
C29_2 C30_2 C11_2 121.1 . . ? 
C31_2 C30_2 C11_2 104.6 . . ? 
C29_2 C30_2 Sm1 63.95(19) . 6_565 ? 
C31_2 C30_2 Sm1 88.3(2) . 6_565 ? 
C11_2 C30_2 Sm1 87.8(2) . 6_565 ? 
C32_2 C31_2 C30_2 119.5 . . ? 
C32_2 C31_2 C13_2 119.0 . . ? 
C30_2 C31_2 C13_2 111.1 . . ? 
C31_2 C32_2 C54_2 115.5 . . ? 
C31_2 C32_2 C33_2 122.2 . . ? 
C54_2 C32_2 C33_2 111.2 . . ? 
C56_2 C33_2 C32_2 109.3 . . ? 
C56_2 C33_2 C34_2 120.8 . . ? 
C32_2 C33_2 C34_2 118.6 . . ? 
C56_2 C33_2 Sm2 75.7(2) . . ? 
C32_2 C33_2 Sm2 102.6(2) . . ? 
C34_2 C33_2 Sm2 62.1(2) . . ? 
C56_2 C33_2 Sm4 84.6(2) . . ? 
C32_2 C33_2 Sm4 103.0(2) . . ? 
C34_2 C33_2 Sm4 53.4(2) . . ? 
C14_2 C34_2 C35_2 128.1 . . ? 
C14_2 C34_2 C33_2 113.9 . . ? 
C35_2 C34_2 C33_2 112.9 . . ? 
C14_2 C34_2 Sm4 89.0(3) . . ? 
C35_2 C34_2 Sm4 66.6(3) . . ? 
C33_2 C34_2 Sm4 94.1(3) . . ? 
C14_2 C34_2 Sm3 72.5(3) . . ? 
C35_2 C34_2 Sm3 75.5(3) . . ? 
C33_2 C34_2 Sm3 104.5(3) . . ? 
C14_2 C34_2 Sm2 97.3(2) . . ? 
C35_2 C34_2 Sm2 67.1(3) . . ? 
C33_2 C34_2 Sm2 83.7(3) . . ? 
C14_2 C34_2 Sm3 73.3(2) . 6_565 ? 
C35_2 C34_2 Sm3 71.3(2) . 6_565 ? 
C33_2 C34_2 Sm3 109.5(2) . 6_565 ? 
C14_2 C34_2 Sm5 93.5(3) . . ? 
C35_2 C34_2 Sm5 60.3(2) . . ? 
C33_2 C34_2 Sm5 96.3(2) . . ? 
C14_2 C34_2 Sm4 87.6(2) . 6_565 ? 
C35_2 C34_2 Sm4 59.9(2) . 6_565 ? 
C33_2 C34_2 Sm4 104.6(2) . 6_565 ? 
C58_2 C35_2 C36_2 118.9 . . ? 
C58_2 C35_2 C34_2 121.8 . . ? 
C36_2 C35_2 C34_2 114.8 . . ? 
C58_2 C35_2 Sm4 91.3(3) . . ? 
C36_2 C35_2 Sm4 81.6(3) . . ? 
C34_2 C35_2 Sm4 75.5(3) . . ? 
C58_2 C35_2 Sm2 80.6(3) . . ? 
C36_2 C35_2 Sm2 91.8(3) . . ? 
C34_2 C35_2 Sm2 76.9(3) . . ? 
C58_2 C35_2 Sm5 85.3(3) . . ? 
C36_2 C35_2 Sm5 77.1(3) . . ? 
C34_2 C35_2 Sm5 86.1(3) . . ? 
C58_2 C35_2 Sm4 92.8(3) . 6_565 ? 
C36_2 C35_2 Sm4 67.2(3) . 6_565 ? 
C34_2 C35_2 Sm4 88.1(3) . 6_565 ? 
C58_2 C35_2 Sm3 107.3(2) . . ? 
C36_2 C35_2 Sm3 72.7(3) . . ? 
C34_2 C35_2 Sm3 68.8(3) . . ? 
C58_2 C35_2 Sm3 107.5(2) . 6_565 ? 
C36_2 C35_2 Sm3 65.8(3) . 6_565 ? 
C34_2 C35_2 Sm3 75.4(3) . 6_565 ? 
C58_2 C35_2 Sm2 84.4(2) . 6_565 ? 
C36_2 C35_2 Sm2 67.7(2) . 6_565 ? 
C34_2 C35_2 Sm2 96.5(2) . 6_565 ? 
C16_2 C36_2 C37_2 116.4 . . ? 
C16_2 C36_2 C35_2 121.2 . . ? 
C37_2 C36_2 C35_2 117.2 . . ? 
C16_2 C36_2 Sm4 86.0(3) . 6_565 ? 
C37_2 C36_2 Sm4 84.5(3) . 6_565 ? 
C35_2 C36_2 Sm4 76.6(3) . 6_565 ? 
C16_2 C36_2 Sm3 70.4(2) . 6_565 ? 
C37_2 C36_2 Sm3 98.0(3) . 6_565 ? 
C35_2 C36_2 Sm3 79.8(3) . 6_565 ? 
C16_2 C36_2 Sm5 93.4(3) . . ? 
C37_2 C36_2 Sm5 86.8(3) . . ? 
C35_2 C36_2 Sm5 67.3(2) . . ? 
C16_2 C36_2 Sm3 72.6(3) . . ? 
C37_2 C36_2 Sm3 104.0(2) . . ? 
C35_2 C36_2 Sm3 72.6(3) . . ? 
C16_2 C36_2 Sm4 88.9(3) . . ? 
C37_2 C36_2 Sm4 96.9(2) . . ? 
C35_2 C36_2 Sm4 62.4(3) . . ? 
C16_2 C36_2 Sm2 93.1(2) . 6_565 ? 
C37_2 C36_2 Sm2 74.4(2) . 6_565 ? 
C35_2 C36_2 Sm2 79.4(3) . 6_565 ? 
C16_2 C36_2 Sm2 97.0(2) . . ? 
C37_2 C36_2 Sm2 94.7(2) . . ? 
C35_2 C36_2 Sm2 56.4(2) . . ? 
C60_2 C37_2 C36_2 123.9 . . ? 
C60_2 C37_2 C38_2 104.5 . . ? 
C36_2 C37_2 C38_2 119.6 . . ? 
C60_2 C37_2 Sm2 81.0(2) . 6_565 ? 
C36_2 C37_2 Sm2 71.9(2) . 6_565 ? 
C38_2 C37_2 Sm2 83.9(2) . 6_565 ? 
C60_2 C37_2 Sm4 89.7(2) . 6_565 ? 
C36_2 C37_2 Sm4 61.4(2) . 6_565 ? 
C38_2 C37_2 Sm4 87.7(2) . 6_565 ? 
C60_2 C37_2 Sm5 83.4(3) . . ? 
C36_2 C37_2 Sm5 61.6(2) . . ? 
C38_2 C37_2 Sm5 94.5(2) . . ? 
C60_2 C37_2 Sm3 102.17(19) . 6_565 ? 
C36_2 C37_2 Sm3 52.65(19) . 6_565 ? 
C38_2 C37_2 Sm3 86.2(2) . 6_565 ? 
C60_2 C37_2 Sm4 88.5(2) . . ? 
C36_2 C37_2 Sm4 54.36(19) . . ? 
C38_2 C37_2 Sm4 98.3(2) . . ? 
C18_2 C38_2 C39_2 117.9 . . ? 
C18_2 C38_2 C37_2 121.1 . . ? 
C39_2 C38_2 C37_2 112.6 . . ? 
C18_2 C38_2 Sm2 90.5(2) . 6_565 ? 
C39_2 C38_2 Sm2 86.8(2) . 6_565 ? 
C37_2 C38_2 Sm2 63.8(2) . 6_565 ? 
C18_2 C38_2 Sm4 84.7(2) . 6_565 ? 
C39_2 C38_2 Sm4 95.9(2) . 6_565 ? 
C37_2 C38_2 Sm4 61.59(19) . 6_565 ? 
C40_2 C39_2 C38_2 129.9 . . ? 
C40_2 C39_2 C61_2 114.2 . . ? 
C38_2 C39_2 C61_2 103.6 . . ? 
C40_2 C39_2 Sm2 95.64(17) . 6_565 ? 
C38_2 C39_2 Sm2 65.55(18) . 6_565 ? 
C61_2 C39_2 Sm2 72.04(19) . 6_565 ? 
C39_2 C40_2 C41_2 112.2 . . ? 
C39_2 C40_2 C64_2 125.8 . . ? 
C41_2 C40_2 C64_2 115.4 . . ? 
C19_2 C41_2 C40_2 120.0 . . ? 
C19_2 C41_2 C42_2 106.8 . . ? 
C40_2 C41_2 C42_2 123.4 . . ? 
C19_2 C41_2 Sm1 87.22(18) . . ? 
C40_2 C41_2 Sm1 88.49(17) . . ? 
C42_2 C41_2 Sm1 62.75(17) . . ? 
C43_2 C42_2 C41_2 116.8 . . ? 
C43_2 C42_2 C21_2 122.8 . . ? 
C41_2 C42_2 C21_2 111.4 . . ? 
C43_2 C42_2 Sm1 76.2(2) . . ? 
C41_2 C42_2 Sm1 87.70(19) . . ? 
C21_2 C42_2 Sm1 76.9(2) . . ? 
C65_2 C43_2 C42_2 121.4 . . ? 
C65_2 C43_2 C44_2 109.3 . . ? 
C42_2 C43_2 C44_2 119.8 . . ? 
C65_2 C43_2 Sm1 87.88(19) . . ? 
C42_2 C43_2 Sm1 73.0(2) . . ? 
C44_2 C43_2 Sm1 78.99(19) . . ? 
C65_2 C43_2 Sm6 81.8(3) . 6_565 ? 
C42_2 C43_2 Sm6 88.5(3) . 6_565 ? 
C44_2 C43_2 Sm6 67.9(2) . 6_565 ? 
C45_2 C44_2 C43_2 108.0 . . ? 
C45_2 C44_2 C23_2 120.6 . . ? 
C43_2 C44_2 C23_2 114.3 . . ? 
C45_2 C44_2 Sm6 78.3(3) . 6_565 ? 
C43_2 C44_2 Sm6 81.4(3) . 6_565 ? 
C23_2 C44_2 Sm6 69.3(3) . 6_565 ? 
C45_2 C44_2 Sm1 92.84(19) . . ? 
C43_2 C44_2 Sm1 69.55(19) . . ? 
C23_2 C44_2 Sm1 66.80(18) . . ? 
C44_2 C45_2 C46_2 129.9 . . ? 
C44_2 C45_2 C66_2 112.0 . . ? 
C46_2 C45_2 C66_2 108.7 . . ? 
C44_2 C45_2 Sm6 73.2(3) . 6_565 ? 
C46_2 C45_2 Sm6 86.4(3) . 6_565 ? 
C66_2 C45_2 Sm6 80.4(3) . 6_565 ? 
C45_2 C46_2 C69_2 123.4 . . ? 
C45_2 C46_2 C47_2 106.5 . . ? 
C69_2 C46_2 C47_2 120.5 . . ? 
C45_2 C46_2 Sm6 65.9(3) . 6_565 ? 
C69_2 C46_2 Sm6 92.4(2) . 6_565 ? 
C47_2 C46_2 Sm6 79.5(2) . 6_565 ? 
C24_2 C47_2 C48_2 125.4 . . ? 
C24_2 C47_2 C46_2 128.7 . . ? 
C48_2 C47_2 C46_2 95.3 . . ? 
C24_2 C47_2 Sm6 71.0(2) . 6_565 ? 
C48_2 C47_2 Sm6 99.8(2) . 6_565 ? 
C46_2 C47_2 Sm6 72.6(2) . 6_565 ? 
C70_2 C48_2 C47_2 114.9 . . ? 
C70_2 C48_2 C49_2 119.0 . . ? 
C47_2 C48_2 C49_2 116.4 . . ? 
C70_2 C48_2 Sm6 76.3(3) . . ? 
C47_2 C48_2 Sm6 90.5(2) . . ? 
C49_2 C48_2 Sm6 72.6(3) . . ? 
C26_2 C49_2 C48_2 121.5 . . ? 
C26_2 C49_2 C50_2 108.4 . . ? 
C48_2 C49_2 C50_2 120.7 . . ? 
C26_2 C49_2 Sm6 85.3(3) . . ? 
C48_2 C49_2 Sm6 80.7(3) . . ? 
C50_2 C49_2 Sm6 73.1(3) . . ? 
C51_2 C50_2 C49_2 116.7 . . ? 
C51_2 C50_2 C28_2 120.4 . . ? 
C49_2 C50_2 C28_2 110.4 . . ? 
C51_2 C50_2 Sm6 73.6(3) . . ? 
C49_2 C50_2 Sm6 77.5(3) . . ? 
C28_2 C50_2 Sm6 83.3(3) . . ? 
C51_2 C50_2 Sm1 77.1(2) . 6_565 ? 
C49_2 C50_2 Sm1 88.7(2) . 6_565 ? 
C28_2 C50_2 Sm1 69.4(2) . 6_565 ? 
C50_2 C51_2 C52_2 118.8 . . ? 
C50_2 C51_2 C71_2 122.7 . . ? 
C52_2 C51_2 C71_2 109.0 . . ? 
C50_2 C51_2 Sm6 79.0(3) . . ? 
C52_2 C51_2 Sm6 82.0(3) . . ? 
C71_2 C51_2 Sm6 78.3(3) . . ? 
C50_2 C51_2 Sm1 76.2(2) . 6_565 ? 
C52_2 C51_2 Sm1 71.2(2) . 6_565 ? 
C71_2 C51_2 Sm1 92.23(19) . 6_565 ? 
C51_2 C52_2 C53_2 122.4 . . ? 
C51_2 C52_2 C73_2 113.6 . . ? 
C53_2 C52_2 C73_2 118.5 . . ? 
C51_2 C52_2 Sm1 80.7(2) . 6_565 ? 
C53_2 C52_2 Sm1 72.2(2) . 6_565 ? 
C73_2 C52_2 Sm1 95.0(2) . 6_565 ? 
C51_2 C52_2 Sm6 70.2(3) . . ? 
C53_2 C52_2 Sm6 87.1(3) . . ? 
C73_2 C52_2 Sm6 89.4(3) . . ? 
C54_2 C53_2 C52_2 117.8 . . ? 
C54_2 C53_2 C29_2 115.2 . . ? 
C52_2 C53_2 C29_2 117.6 . . ? 
C54_2 C53_2 Sm1 88.6(2) . 6_565 ? 
C52_2 C53_2 Sm1 77.5(2) . 6_565 ? 
C29_2 C53_2 Sm1 73.3(2) . 6_565 ? 
C53_2 C54_2 C32_2 128.4 . . ? 
C53_2 C54_2 C55_2 118.9 . . ? 
C32_2 C54_2 C55_2 104.4 . . ? 
C53_2 C54_2 Sm1 64.38(19) . 6_565 ? 
C32_2 C54_2 Sm1 90.1(2) . 6_565 ? 
C55_2 C54_2 Sm1 90.61(19) . 6_565 ? 
C74_2 C55_2 C54_2 125.0 . . ? 
C74_2 C55_2 C56_2 120.5 . . ? 
C54_2 C55_2 C56_2 102.6 . . ? 
C33_2 C56_2 C57_2 126.6 . . ? 
C33_2 C56_2 C55_2 112.2 . . ? 
C57_2 C56_2 C55_2 112.3 . . ? 
C33_2 C56_2 Sm2 78.2(2) . . ? 
C57_2 C56_2 Sm2 68.5(2) . . ? 
C55_2 C56_2 Sm2 97.1(2) . . ? 
C33_2 C56_2 Sm4 71.5(2) . . ? 
C57_2 C56_2 Sm4 71.5(2) . . ? 
C55_2 C56_2 Sm4 102.4(2) . . ? 
C76_2 C57_2 C56_2 125.0 . . ? 
C76_2 C57_2 C58_2 113.7 . . ? 
C56_2 C57_2 C58_2 115.8 . . ? 
C76_2 C57_2 Sm2 94.9(2) . . ? 
C56_2 C57_2 Sm2 80.9(3) . . ? 
C58_2 C57_2 Sm2 69.8(3) . . ? 
C76_2 C57_2 Sm4 100.52(19) . . ? 
C56_2 C57_2 Sm4 81.3(2) . . ? 
C58_2 C57_2 Sm4 63.6(2) . . ? 
C76_2 C57_2 Sm5 93.9(2) . . ? 
C56_2 C57_2 Sm5 89.4(2) . . ? 
C58_2 C57_2 Sm5 61.4(2) . . ? 
C35_2 C58_2 C59_2 118.5 . . ? 
C35_2 C58_2 C57_2 119.8 . . ? 
C59_2 C58_2 C57_2 103.7 . . ? 
C35_2 C58_2 Sm2 66.8(2) . . ? 
C59_2 C58_2 Sm2 86.1(2) . . ? 
C57_2 C58_2 Sm2 76.0(3) . . ? 
C35_2 C58_2 Sm5 63.3(3) . . ? 
C59_2 C58_2 Sm5 77.8(2) . . ? 
C57_2 C58_2 Sm5 88.5(2) . . ? 
C35_2 C58_2 Sm4 57.5(2) . . ? 
C59_2 C58_2 Sm4 87.3(2) . . ? 
C57_2 C58_2 Sm4 85.9(3) . . ? 
C35_2 C58_2 Sm4 58.6(2) . 6_565 ? 
C59_2 C58_2 Sm4 76.6(2) . 6_565 ? 
C57_2 C58_2 Sm4 96.1(2) . 6_565 ? 
C35_2 C58_2 Sm2 67.5(2) . 6_565 ? 
C59_2 C58_2 Sm2 67.2(2) . 6_565 ? 
C57_2 C58_2 Sm2 95.3(2) . 6_565 ? 
C77_2 C59_2 C60_2 126.0 . . ? 
C77_2 C59_2 C58_2 108.1 . . ? 
C60_2 C59_2 C58_2 124.5 . . ? 
C77_2 C59_2 Sm2 101.3(2) . 6_565 ? 
C60_2 C59_2 Sm2 75.7(2) . 6_565 ? 
C58_2 C59_2 Sm2 83.3(2) . 6_565 ? 
C77_2 C59_2 Sm5 100.4(2) . . ? 
C60_2 C59_2 Sm5 86.9(2) . . ? 
C58_2 C59_2 Sm5 71.1(2) . . ? 
C77_2 C59_2 Sm2 93.2(2) . . ? 
C60_2 C59_2 Sm2 99.5(2) . . ? 
C58_2 C59_2 Sm2 63.3(2) . . ? 
C77_2 C59_2 Sm4 106.7(2) . 6_565 ? 
C60_2 C59_2 Sm4 78.9(2) . 6_565 ? 
C58_2 C59_2 Sm4 74.5(2) . 6_565 ? 
C77_2 C59_2 Sm4 102.0(2) . . ? 
C60_2 C59_2 Sm4 91.7(2) . . ? 
C58_2 C59_2 Sm4 63.7(2) . . ? 
C37_2 C60_2 C59_2 114.0 . . ? 
C37_2 C60_2 C61_2 112.6 . . ? 
C59_2 C60_2 C61_2 116.8 . . ? 
C37_2 C60_2 Sm2 68.7(2) . 6_565 ? 
C59_2 C60_2 Sm2 73.5(2) . 6_565 ? 
C61_2 C60_2 Sm2 86.5(2) . 6_565 ? 
C37_2 C60_2 Sm4 62.4(2) . 6_565 ? 
C59_2 C60_2 Sm4 72.8(2) . 6_565 ? 
C61_2 C60_2 Sm4 94.36(19) . 6_565 ? 
C37_2 C60_2 Sm5 69.2(2) . . ? 
C59_2 C60_2 Sm5 64.6(2) . . ? 
C61_2 C60_2 Sm5 96.32(19) . . ? 
C62_2 C61_2 C60_2 119.8 . . ? 
C62_2 C61_2 C39_2 122.0 . . ? 
C60_2 C61_2 C39_2 106.4 . . ? 
C62_2 C61_2 Sm2 91.11(19) . 6_565 ? 
C60_2 C61_2 Sm2 63.81(18) . 6_565 ? 
C39_2 C61_2 Sm2 78.9(2) . 6_565 ? 
C61_2 C62_2 C63_2 123.4 . . ? 
C61_2 C62_2 C78_2 116.5 . . ? 
C63_2 C62_2 C78_2 109.3 . . ? 
C62_2 C63_2 C64_2 116.3 . . ? 
C62_2 C63_2 C80_2 108.0 . . ? 
C64_2 C63_2 C80_2 127.3 . . ? 
C65_2 C64_2 C63_2 116.3 . . ? 
C65_2 C64_2 C40_2 119.0 . . ? 
C63_2 C64_2 C40_2 117.9 . . ? 
C64_2 C65_2 C43_2 123.6 . . ? 
C64_2 C65_2 C66_2 115.9 . . ? 
C43_2 C65_2 C66_2 110.5 . . ? 
C64_2 C65_2 Sm1 87.43(17) . . ? 
C43_2 C65_2 Sm1 63.97(17) . . ? 
C66_2 C65_2 Sm1 87.54(18) . . ? 
C64_2 C65_2 Sm6 94.1(2) . 6_565 ? 
C43_2 C65_2 Sm6 70.8(2) . 6_565 ? 
C66_2 C65_2 Sm6 72.5(3) . 6_565 ? 
C67_2 C66_2 C65_2 126.0 . . ? 
C67_2 C66_2 C45_2 122.7 . . ? 
C65_2 C66_2 C45_2 100.0 . . ? 
C67_2 C66_2 Sm6 88.5(3) . 6_565 ? 
C65_2 C66_2 Sm6 78.0(3) . 6_565 ? 
C45_2 C66_2 Sm6 67.7(2) . 6_565 ? 
C66_2 C67_2 C80_2 120.4 . . ? 
C66_2 C67_2 C68_2 120.7 . . ? 
C80_2 C67_2 C68_2 116.3 . . ? 
C69_2 C68_2 C67_2 112.9 . . ? 
C69_2 C68_2 C82_2 114.6 . . ? 
C67_2 C68_2 C82_2 113.0 . . ? 
C68_2 C69_2 C46_2 130.3 . . ? 
C68_2 C69_2 C70_2 127.1 . . ? 
C46_2 C69_2 C70_2 96.0 . . ? 
C48_2 C70_2 C71_2 127.3 . . ? 
C48_2 C70_2 C69_2 112.0 . . ? 
C71_2 C70_2 C69_2 111.0 . . ? 
C48_2 C70_2 Sm6 78.1(3) . . ? 
C71_2 C70_2 Sm6 72.7(3) . . ? 
C69_2 C70_2 Sm6 90.2(2) . . ? 
C70_2 C71_2 C51_2 113.4 . . ? 
C70_2 C71_2 C72_2 132.3 . . ? 
C51_2 C71_2 C72_2 100.4 . . ? 
C70_2 C71_2 Sm6 81.1(3) . . ? 
C51_2 C71_2 Sm6 70.9(3) . . ? 
C72_2 C71_2 Sm6 79.3(3) . . ? 
C82_2 C72_2 C73_2 135.9 . . ? 
C82_2 C72_2 C71_2 107.5 . . ? 
C73_2 C72_2 C71_2 112.5 . . ? 
C82_2 C72_2 Sm6 89.5(2) . . ? 
C73_2 C72_2 Sm6 86.7(3) . . ? 
C71_2 C72_2 Sm6 71.0(2) . . ? 
C74_2 C73_2 C72_2 111.6 . . ? 
C74_2 C73_2 C52_2 123.4 . . ? 
C72_2 C73_2 C52_2 102.8 . . ? 
C55_2 C74_2 C73_2 113.2 . . ? 
C55_2 C74_2 C75_2 117.4 . . ? 
C73_2 C74_2 C75_2 126.8 . . ? 
C76_2 C75_2 C74_2 123.1 . . ? 
C76_2 C75_2 C81_2 118.1 . . ? 
C74_2 C75_2 C81_2 109.1 . . ? 
C75_2 C76_2 C57_2 120.6 . . ? 
C75_2 C76_2 C77_2 128.4 . . ? 
C57_2 C76_2 C77_2 99.9 . . ? 
C75_2 C76_2 Sm2 94.1(2) . . ? 
C57_2 C76_2 Sm2 57.61(18) . . ? 
C77_2 C76_2 Sm2 81.2(2) . . ? 
C78_2 C77_2 C59_2 116.1 . . ? 
C78_2 C77_2 C76_2 116.0 . . ? 
C59_2 C77_2 C76_2 113.4 . . ? 
C77_2 C78_2 C62_2 122.8 . . ? 
C77_2 C78_2 C79_2 118.8 . . ? 
C62_2 C78_2 C79_2 107.0 . . ? 
C81_2 C79_2 C80_2 119.6 . . ? 
C81_2 C79_2 C78_2 126.4 . . ? 
C80_2 C79_2 C78_2 103.1 . . ? 
C67_2 C80_2 C63_2 112.6 . . ? 
C67_2 C80_2 C79_2 127.1 . . ? 
C63_2 C80_2 C79_2 112.5 . . ? 
C79_2 C81_2 C82_2 120.1 . . ? 
C79_2 C81_2 C75_2 111.5 . . ? 
C82_2 C81_2 C75_2 123.6 . . ? 
C72_2 C82_2 C81_2 110.9 . . ? 
C72_2 C82_2 C68_2 125.0 . . ? 
C81_2 C82_2 C68_2 120.5 . . ? 
N2 Ni1 N3 177.71(8) . . ? 
N2 Ni1 N1 89.98(4) . 6_565 ? 
N3 Ni1 N1 89.97(4) . 6_565 ? 
N2 Ni1 N1 89.98(4) . . ? 
N3 Ni1 N1 89.97(4) . . ? 
N1 Ni1 N1 177.69(8) 6_565 . ? 
C86 N1 C83 104.39(14) . . ? 
C86 N1 Ni1 127.86(11) . . ? 
C83 N1 Ni1 127.73(11) . . ? 
C88 N2 C88 104.35(19) 6_565 . ? 
C88 N2 Ni1 127.81(10) 6_565 . ? 
C88 N2 Ni1 127.81(10) . . ? 
C91 N3 C91 104.00(19) 6_565 . ? 
C91 N3 Ni1 127.97(9) 6_565 . ? 
C91 N3 Ni1 127.96(9) . . ? 
C92 C83 N1 125.11(15) . . ? 
C92 C83 C84 123.44(15) . . ? 
N1 C83 C84 111.43(15) . . ? 
C85 C84 C83 106.50(15) . . ? 
C85 C84 C93 129.02(17) . . ? 
C83 C84 C93 124.47(16) . . ? 
C84 C85 C86 106.17(15) . . ? 
C84 C85 C95 129.17(16) . . ? 
C86 C85 C95 124.61(16) . . ? 
N1 C86 C87 125.16(15) . . ? 
N1 C86 C85 111.51(15) . . ? 
C87 C86 C85 123.32(16) . . ? 
C88 C87 C86 123.63(16) . . ? 
C88 C87 H87 118.2 . . ? 
C86 C87 H87 118.2 . . ? 
C87 C88 N2 125.51(15) . . ? 
C87 C88 C89 123.06(16) . . ? 
N2 C88 C89 111.40(15) . . ? 
C89 C89 C88 106.41(10) 6_565 . ? 
C89 C89 C97 129.03(10) 6_565 . ? 
C88 C89 C97 124.49(16) . . ? 
C90 C90 C91 106.22(10) 6_565 . ? 
C90 C90 C99 128.54(10) 6_565 . ? 
C91 C90 C99 125.06(16) . . ? 
C92 C91 N3 125.13(15) . . ? 
C92 C91 C90 123.08(15) . . ? 
N3 C91 C90 111.78(15) . . ? 
C83 C92 C91 124.06(15) . . ? 
C83 C92 H92 118.0 . . ? 
C91 C92 H92 118.0 . . ? 
C84 C93 C94 112.83(17) . . ? 
C84 C93 H93A 109.0 . . ? 
C94 C93 H93A 109.0 . . ? 
C84 C93 H93B 109.0 . . ? 
C94 C93 H93B 109.0 . . ? 
H93A C93 H93B 107.8 . . ? 
C93 C94 H94A 109.5 . . ? 
C93 C94 H94B 109.5 . . ? 
H94A C94 H94B 109.5 . . ? 
C93 C94 H94C 109.5 . . ? 
H94A C94 H94C 109.5 . . ? 
H94B C94 H94C 109.5 . . ? 
C85 C95 C96 112.96(17) . . ? 
C85 C95 H95A 109.0 . . ? 
C96 C95 H95A 109.0 . . ? 
C85 C95 H95B 109.0 . . ? 
C96 C95 H95B 109.0 . . ? 
H95A C95 H95B 107.8 . . ? 
C95 C96 H96A 109.5 . . ? 
C95 C96 H96B 109.5 . . ? 
H96A C96 H96B 109.5 . . ? 
C95 C96 H96C 109.5 . . ? 
H96A C96 H96C 109.5 . . ? 
H96B C96 H96C 109.5 . . ? 
C89 C97 C98 113.06(16) . . ? 
C89 C97 H97A 109.0 . . ? 
C98 C97 H97A 109.0 . . ? 
C89 C97 H97B 109.0 . . ? 
C98 C97 H97B 109.0 . . ? 
H97A C97 H97B 107.8 . . ? 
C97 C98 H98A 109.5 . . ? 
C97 C98 H98B 109.5 . . ? 
H98A C98 H98B 109.5 . . ? 
C97 C98 H98C 109.5 . . ? 
H98A C98 H98C 109.5 . . ? 
H98B C98 H98C 109.5 . . ? 
C90 C99 C100 112.03(15) . . ? 
C90 C99 H99A 109.2 . . ? 
C100 C99 H99A 109.2 . . ? 
C90 C99 H99B 109.2 . . ? 
C100 C99 H99B 109.2 . . ? 
H99A C99 H99B 107.9 . . ? 
C99 C100 H10A 109.5 . . ? 
C99 C100 H10B 109.5 . . ? 
H10A C100 H10B 109.5 . . ? 
C99 C100 H10C 109.5 . . ? 
H10A C100 H10C 109.5 . . ? 
H10B C100 H10C 109.5 . . ? 
C106 C101 C102 120.3(3) . . ? 
C106 C101 H101 119.8 . . ? 
C102 C101 H101 119.8 . . ? 
C103 C102 C101 119.8(3) . . ? 
C103 C102 H102 120.1 . . ? 
C101 C102 H102 120.1 . . ? 
C102 C103 C104 119.8(3) . . ? 
C102 C103 H103 120.1 . . ? 
C104 C103 H103 120.1 . . ? 
C105 C104 C103 120.0(3) . . ? 
C105 C104 H104 120.0 . . ? 
C103 C104 H104 120.0 . . ? 
C106 C105 C104 120.1(3) . . ? 
C106 C105 H105 119.9 . . ? 
C104 C105 H105 119.9 . . ? 
C101 C106 C105 119.9(4) . . ? 
C101 C106 H106 120.1 . . ? 
C105 C106 H106 120.1 . . ? 
C108 C107 C109 119.5(8) . 2_655 ? 
C108 C107 H107 120.2 . . ? 
C109 C107 H107 120.2 2_655 . ? 
C107 C108 C109 126.2(8) . . ? 
C107 C108 H108 116.9 . . ? 
C109 C108 H108 116.9 . . ? 
C107 C109 C108 114.0(10) 2_655 . ? 
C107 C109 H109 123.0 2_655 . ? 
C108 C109 H109 123.0 . . ? 
C111 C110 C115 120.0 . . ? 
C111 C110 H110 120.0 . . ? 
C115 C110 H110 120.0 . . ? 
C110 C111 C112 120.0 . . ? 
C110 C111 H111 120.0 . . ? 
C112 C111 H111 120.0 . . ? 
C111 C112 C113 120.0 . . ? 
C111 C112 H112 120.0 . . ? 
C113 C112 H112 120.0 . . ? 
C114 C113 C112 120.0 . . ? 
C114 C113 H113 120.0 . . ? 
C112 C113 H113 120.0 . . ? 
C115 C114 C113 120.0 . . ? 
C115 C114 H114 120.0 . . ? 
C113 C114 H114 120.0 . . ? 
C114 C115 C110 120.0 . . ? 
C114 C115 H115 120.0 . . ? 
C110 C115 H115 120.0 . . ? 
 
_diffrn_measured_fraction_theta_max    1.000 
_diffrn_reflns_theta_full              32.58 
_diffrn_measured_fraction_theta_full   1.000 
_refine_diff_density_max    1.382 
_refine_diff_density_min   -1.676 
_refine_diff_density_rms    0.104
# start Validation Reply Form
_vrf_PLAT214_mn2044
;
PROBLEM: Atom SM4   (Anion/Solvent) ADP max/min Ratio         8.4 prola   
RESPONSE: Part of a disordered group of metal ions
;
_vrf_PLAT221_mn2044
;
PROBLEM: Large Solvent/Anion  C     Ueq(max)/Ueq(min) ...        5.6 Ratio
RESPONSE: Part of a disordered solvent benzene
;
_vrf_PLAT214_mn2044
223_ALERT_4_A 
;
PROBLEM: Large Solvent/Anion  H     Ueq(max)/Ueq(min) ...        5.7 Ratio
RESPONSE: Hydrogen tied to disordered C of solvent benzene
;
_vrf_PLAT307_mn2044
;
PROBLEM: Isolated Metal Atom (Unusual !) ................       <Sm1  
RESPONSE: This is a single endohedral metal atom
;
_vrf_PLAT308_mn2044
;
PROBLEM: Single Bonded Metal Atom (Unusual !) ...........       <Sm2
RESPONSE: This is a single endohedral metal atom
;
_vrf_PLAT308_mn2044
;
PROBLEM: Single Bonded Metal Atom (Unusual !) ...........       <Sm6
RESPONSE: This is a single endohedral metal atom
;

_iucr_refine_instructions_details
;
TITL mn2044 in C2/m  Sm@C82 C2(5) NiOEP 2 benzene
CELL 0.71073  25.3364  15.0718  19.7948  90.000  94.208  90.000
ZERR    4.00   0.0004   0.0002   0.0003   0.000   0.004   0.000
LATT  7
SYMM -X, Y, -Z
SFAC C H N NI SM
UNIT 520 224 16 4 4
omit 0 0 1
eqiv $1 x, 1-y, z
l.s. 10
sadi_1 .01 c1 c2 c4 c5
sadi_1 .01 c2 c3 c5 c6
sadi_1 .01 c2 c12 c5 c20
sadi_1 .01 c1 c9 c4 c17
sadi_1 .01 c6 c7 c3 c15
sadi_1 .01 c1 c6 c3 c4
sadi_1 .01 c7 c8 c15 c16
sadi_1 .01 c7 c22 c14 c15
sadi_1 .01 c8 c9 c16 c17
sadi_1 .01 c8 c25 c16 c36
sadi_1 .01 c9 c10 c17 c18
sadi_1 .01 c10 c27 c18 c38
sadi_1 .01 c10 c11 c18 c19
sadi_1 .01 c11 c12 c19 c20
sadi_1 .01 c11 c30 c19 c41
sadi_1 .01 c12 c13 c20 c21
sadi_1 .01 c13 c14 c21 c22
sadi_1 .01 c13 c31 c21 c42
sadi_1 .01 c14 c34 c22 c23
sadi_1 .01 c23 c24 c35 c34
sadi_1 .01 c23 c44 c34 c33
sadi_1 .01 c24 c25 c35 c36
sadi_1 .01 c24 c47 c35 c58
sadi_1 .01 c25 c26 c36 c37
sadi_1 .01 c26 c27 c37 c38
sadi_1 .01 c26 c49 c37 c60
sadi_1 .01 c27 c28 c38 c39
sadi_1 .01 c28 c29 c39 c40
sadi_1 .01 c28 c50 c39 c61
sadi_1 .01 c29 c30 c40 c41
sadi_1 .01 c29 c53 c40 c64
sadi_1 .01 c30 c31 c41 c42
sadi_1 .01 c31 c32 c42 c43
sadi_1 .01 c32 c33 c43 c44
sadi_1 .01 c32 c54 c43 c65
sadi_1 .01 c45 c46 c56 c57
sadi_1 .01 c45 c66 c56 c55
sadi_1 .01 c46 c47 c57 c58
sadi_1 .01 c46 c69 c57 c76
sadi_1 .01 c47 c48 c58 c59
sadi_1 .01 c48 c49 c59 c60
sadi_1 .01 c48 c70 c59 c77
sadi_1 .01 c49 c50 c60 c61
sadi_1 .01 c50 c51 c61 c62
sadi_1 .01 c51 c71 c62 c78
sadi_1 .01 c51 c52 c62 c63
sadi_1 .01 c52 c53 c63 c64
sadi_1 .01 c53 c54 c64 c65
sadi_1 .01 c54 c55 c65 c66
sadi_1 .01 c55 c74 c66 c67
sadi_1 .01 c67 c68 c74 c75
sadi_1 .01 c68 c69 c75 c76
sadi_1 .01 c69 c70 c76 c77
sadi_1 .01 c70 c71 c77 c78
sadi_1 .01 c71 c8_$1 c78 C79
sadi_1 .01 c8_$1 c82 c79 c81
sadi_1 .01 c8_$1 c73 c79 c80
sadi_1 .01 c52 c73 c63 c80
sadi_1 .01 c73 c74 c67 c80
sadi_1 .01 c75 c81 c68 c82
dfix_1 1.42 .02 c81 c82
dfix_1 1.40 .02 c8_$1 c82
dfix_1 1.45 .02 c8_$1 c71
size 0.17 0.36 0.36
temp -183
eadp c9_1 c73_1
eadp c23_1 c68_1
simu_2
acta
bond $h
rtab bond ni1 c14_1 ni1 c34_1
size 0.16 0.36 0.36 ! black parallelepiped
WGHT    0.113600   20.978195
FVAR       0.04898
SM1   5    0.676084    0.597377    0.206636    10.25000    0.03775    0.03004 =
         0.04394   -0.00327    0.01102    0.00992
SM2   5    0.752832    0.461588    0.148075    10.09000    0.04086    0.05694 =
         0.04359    0.00273    0.03000    0.02541
SM3   5    0.722141    0.488693    0.108607    10.06000    0.05140    0.08517 =
         0.02469   -0.04077    0.02124   -0.03401
SM4   5    0.744193    0.478102    0.129632    10.06000    0.04425    0.05151 =
         0.02147   -0.03155    0.02390   -0.03287
SM5   5    0.751417    0.500000    0.140506    10.03000    0.02236
SM6   5    0.675828    0.434029    0.237578    10.01000    0.01594
PART  -1
 
RESI 1 C82
C1    1    0.707390    0.758000    0.264394    10.44700    0.11203    0.03542 =
         0.08680   -0.01213    0.00785   -0.00139
C2    1    0.672652    0.717512    0.308887    10.44700    0.07014    0.04681 =
         0.05789   -0.01923    0.00906    0.01875
C3    1    0.620109    0.709020    0.273618    10.44700    0.06665    0.02776 =
         0.03444   -0.01602    0.01193    0.02031
C4    1    0.609493    0.728539    0.201633    10.44700    0.05956    0.03561 =
         0.06874    0.00083    0.01684    0.01945
C5    1    0.648533    0.760218    0.157537    10.44700    0.06862    0.03910 =
         0.07494    0.02482    0.00608    0.00231
C6    1    0.700302    0.776102    0.191883    10.44700    0.07168    0.01517 =
         0.10625   -0.00733    0.02377   -0.00587
C7    1    0.750468    0.754537    0.162459    10.44700    0.05978    0.01944 =
         0.06131   -0.00884    0.01470   -0.00998
C9    1    0.764242    0.731634    0.273868    10.44700    0.05710    0.01294 =
         0.04842    0.00054   -0.00268    0.00154
C10   1    0.784131    0.664537    0.327781    10.44700    0.03059    0.05164 =
         0.08109   -0.03811   -0.02617    0.00742
C11   1    0.744790    0.630849    0.372993    10.44700    0.05009    0.05798 =
         0.02878   -0.01555   -0.01471   -0.00095
C12   1    0.691931    0.659313    0.357219    10.44700    0.07520    0.03993 =
         0.03177   -0.01724   -0.00102    0.00979
C13   1    0.657721    0.581965    0.371429    10.44700    0.04183    0.08604 =
         0.03062   -0.01918    0.00721    0.02601
C14   1    0.613225    0.558864    0.333107    10.44700    0.06463    0.05834 =
         0.04159   -0.00137    0.03628   -0.00895
C15   1    0.591413    0.624609    0.284419    10.44700    0.06232    0.08516 =
         0.02982    0.01004    0.02331    0.05501
C16   1    0.557757    0.596342    0.222597    10.44700    0.03143    0.04352 =
         0.04624    0.00811    0.01952    0.01234
C17   1    0.565861    0.668886    0.172673    10.44700    0.03820    0.03807 =
         0.04051    0.00436    0.01531    0.02081
C18   1    0.569225    0.634289    0.101813    10.44700    0.03912    0.07863 =
         0.05258    0.02967   -0.00218    0.02117
C19   1    0.609574    0.671779    0.059988    10.44700    0.04524    0.04736 =
         0.05788    0.02455   -0.00346    0.00529
C20   1    0.648618    0.730934    0.092241    10.44700    0.08147    0.05921 =
         0.04682    0.02783    0.00934    0.03761
C21   1    0.700719    0.716731    0.060472    10.44700    0.11170    0.03167 =
         0.02989    0.00894    0.01099   -0.01133
C22   1    0.749364    0.717607    0.093079    10.44700    0.09253    0.03805 =
         0.05460    0.02017    0.02224   -0.00973
C23   1    0.791229    0.656478    0.077706    10.44700    0.07592    0.03986 =
         0.06568   -0.00219    0.05607    0.00535
C24   1    0.831135    0.624993    0.128404    10.44700    0.04045    0.08776 =
         0.05322    0.01475    0.01954   -0.03500
C25   1    0.828634    0.659108    0.196194    10.44700    0.02855    0.04806 =
         0.08242   -0.00824    0.00749   -0.03279
C26   1    0.850093    0.606130    0.251390    10.44700    0.02572    0.09310 =
         0.05842   -0.01299    0.00361   -0.02935
C27   1    0.826279    0.605435    0.318702    10.44700    0.03978    0.08239 =
         0.04789   -0.00393   -0.02264   -0.02780
C28   1    0.827012    0.518184    0.347383    10.44700    0.05138    0.09176 =
         0.04897   -0.00144   -0.03595   -0.00127
C29   1    0.787834    0.482817    0.381420    10.44700    0.06234    0.06762 =
         0.03879    0.00226   -0.02865    0.00928
C30   1    0.746818    0.540307    0.397690    10.44700    0.07208    0.07492 =
         0.02078   -0.00295   -0.00809   -0.01232
C31   1    0.692905    0.511150    0.399063    10.44700    0.06702    0.08676 =
         0.03262   -0.00949    0.00131    0.01859
C32   1    0.679695    0.425025    0.388267    10.44700    0.07126    0.05228 =
         0.02945    0.00674    0.01583    0.00260
C33   1    0.631099    0.401085    0.350977    10.44700    0.05305    0.05670 =
         0.05150    0.01915    0.01553   -0.01556
C34   1    0.595627    0.470535    0.317306    10.44700    0.04951    0.05556 =
         0.05176   -0.01091    0.04108   -0.02629
C35   1    0.564631    0.441733    0.256924    10.44700    0.04999    0.04750 =
         0.05636   -0.00055    0.02985   -0.01731
C36   1    0.545927    0.511079    0.208613    10.44700    0.02949    0.07890 =
         0.04934    0.01109    0.01904    0.01021
C37   1    0.536816    0.487026    0.139133    10.44700    0.01966    0.05461 =
         0.05895    0.00452   -0.00209   -0.00308
C38   1    0.552260    0.549185    0.085830    10.44700    0.03698    0.06578 =
         0.05496   -0.00041   -0.02381    0.01646
C39   1    0.576466    0.504421    0.031629    10.44700    0.06040    0.06574 =
         0.05412    0.00647   -0.03571    0.01182
C40   1    0.619443    0.527292   -0.000768    10.44700    0.07445    0.05941 =
         0.02843   -0.00147   -0.02055    0.00541
C41   1    0.634406    0.618584    0.010757    10.44700    0.08193    0.04817 =
         0.02432    0.00735   -0.01147    0.01626
C42   1    0.688659    0.647560    0.009540    10.44700    0.08296    0.03499 =
         0.02467    0.01102    0.01808   -0.00554
C43   1    0.725115    0.587858   -0.007375    10.44700    0.10854    0.04753 =
         0.02518    0.01381    0.02979    0.00881
C44   1    0.779128    0.589621    0.023370    10.44700    0.08509    0.07014 =
         0.05830    0.02120    0.05658    0.00005
C45   1    0.798700    0.510487    0.027204    10.44700    0.08561    0.11467 =
         0.07263    0.00658    0.06543   -0.01081
C46   1    0.833552    0.473720    0.074295    10.44700    0.05782    0.08780 =
         0.11304   -0.01501    0.06478    0.00439
C47   1    0.852482    0.543919    0.121838    10.44700    0.03540    0.09298 =
         0.10202    0.00210    0.04540   -0.01134
C48   1    0.870271    0.487345    0.177969    10.44700    0.04035    0.08673 =
         0.11312   -0.01304    0.02521    0.02403
C49   1    0.868273    0.524429    0.239129    10.44700    0.02548    0.08181 =
         0.08637   -0.00441    0.00928   -0.00682
C50   1    0.855597    0.466558    0.297350    10.44700    0.03709    0.09211 =
         0.11349    0.01101   -0.03185    0.01832
C51   1    0.842601    0.382627    0.284192    10.44700    0.03813    0.08744 =
         0.11378    0.03365    0.00170    0.03360
C52   1    0.802091    0.346077    0.322977    10.44700    0.02026    0.04839 =
         0.09659    0.02762   -0.01297    0.00539
C53   1    0.772604    0.389817    0.369777    10.44700    0.04881    0.04438 =
         0.04909    0.00971   -0.02529    0.01441
C54   1    0.720498    0.365099    0.373176    10.44700    0.04719    0.06794 =
         0.03302    0.02096   -0.00354    0.00937
C55   1    0.696808    0.297902    0.328401    10.44700    0.07288    0.04598 =
         0.04315    0.02518   -0.01217   -0.01931
C56   1    0.638041    0.328592    0.320538    10.44700    0.06491    0.08934 =
         0.04897    0.01440    0.02380   -0.02591
C57   1    0.612403    0.303351    0.260944    10.44700    0.08094    0.05581 =
         0.08660    0.04398   -0.01202   -0.03451
C58   1    0.568277    0.359438    0.232357    10.44700    0.03846    0.05956 =
         0.06954   -0.00487   -0.00036   -0.02478
C59   1    0.566636    0.345474    0.159233    10.44700    0.05804    0.05142 =
         0.05473    0.00708    0.00007   -0.03506
C60   1    0.546707    0.405463    0.114769    10.44700    0.02526    0.06470 =
         0.04381   -0.01305   -0.00935   -0.00706
C61   1    0.572545    0.408630    0.050217    10.44700    0.04718    0.05680 =
         0.03573   -0.01586   -0.01979   -0.00133
C62   1    0.611799    0.350406    0.039124    10.44700    0.08820    0.03696 =
         0.04373   -0.00804   -0.01778   -0.00075
C63   1    0.659603    0.375172    0.008435    10.44700    0.07989    0.05898 =
         0.03616   -0.02144    0.00310    0.00924
C64   1    0.661991    0.465355   -0.015017    10.44700    0.09131    0.07725 =
         0.01492   -0.01419    0.00528    0.00317
C66   1    0.755460    0.441450    0.002978    10.44700    0.09782    0.05586 =
         0.03944   -0.00927    0.04849    0.01348
C67   1    0.752655    0.360541    0.035327    10.44700    0.11714    0.09162 =
         0.06818   -0.04996    0.03789    0.01406
C68   1    0.787026    0.326350    0.091562    10.44700    0.07592    0.03986 =
         0.06568   -0.00219    0.05607    0.00535
C69   1    0.828064    0.385862    0.096422    10.44700    0.09508    0.09989 =
         0.12411   -0.01357    0.07555    0.04229
C70   1    0.856536    0.402502    0.163530    10.44700    0.04358    0.08624 =
         0.11246   -0.01361    0.03279    0.02207
C71   1    0.842141    0.344732    0.212780    10.44700    0.03785    0.07609 =
         0.09486    0.01195    0.01910    0.04606
C73   1    0.774389    0.287757    0.280208    10.44700    0.05710    0.01294 =
         0.04842    0.00054   -0.00268    0.00154
C74   1    0.719316    0.259140    0.275120    10.44700    0.06073    0.03624 =
         0.04159    0.01378    0.00322    0.01363
C75   1    0.687844    0.238608    0.212007    10.44700    0.09657    0.03395 =
         0.07745   -0.00678   -0.03528    0.02085
C76   1    0.634875    0.251381    0.212331    10.44700    0.08202    0.02418 =
         0.05673    0.01117   -0.00946   -0.01560
C77   1    0.600599    0.277836    0.151527    10.44700    0.04429    0.05344 =
         0.04733    0.00589   -0.00968   -0.02417
C78   1    0.624678    0.279641    0.092240    10.44700    0.05433    0.03887 =
         0.04455    0.00069   -0.00813   -0.02501
C79   1    0.685895    0.262432    0.094671    10.44700    0.07727    0.03834 =
         0.05266   -0.02349    0.01224   -0.00573
C80   1    0.700306    0.321170    0.037724    10.44700    0.10401    0.06560 =
         0.06496   -0.04007    0.04701   -0.02037
C81   1    0.716300    0.247337    0.149649    10.44700    0.07621    0.05588 =
         0.07831   -0.02638    0.02015   -0.00206
C82   1    0.772427    0.276511    0.150206    10.44700    0.12528    0.03874 =
         0.05207   -0.00916    0.03057    0.02972
PART   0
C8    1    0.793182    0.718084    0.212020    10.89400    0.11241    0.05533 =
         0.07918   -0.00086    0.00661   -0.05795
C65   1    0.712053    0.500000   -0.019976    10.44700    0.12275    0.06749 =
         0.03296    0.00000    0.03961    0.00000
AFIX   6
PART  -2
 
RESI 2 C82
C1    1    0.569830    0.515215    0.051536    10.05300    0.05939
C2    1    0.605198    0.461402    0.014111    10.05300    0.06110
C3    1    0.644828    0.518725   -0.011875    10.05300    0.02694
C4    1    0.649929    0.612099    0.004604    10.05300    0.02876
C5    1    0.617255    0.661211    0.049914    10.05300    0.04283
C6    1    0.575590    0.606555    0.073376    10.05300    0.03899
C7    1    0.556578    0.611944    0.141962    10.05300    0.03219
C8    1    0.541356    0.525258    0.171226    10.05300    0.03218
C9    1    0.552099    0.462108    0.116391    10.05300    0.05514
C10   1    0.559220    0.369129    0.130682    10.05300    0.03759
C11   1    0.592766    0.324862    0.084861    10.05300    0.05500
C12   1    0.614275    0.374835    0.033321    10.05300    0.06615
C13   1    0.668364    0.344428    0.025582    10.05300    0.06972
C14   1    0.711857    0.395119    0.014592    10.05300    0.07863
C15   1    0.700037    0.485280   -0.008543    10.05300    0.07618
C16   1    0.739789    0.556976    0.003002    10.05300    0.07293
C17   1    0.710598    0.643718    0.005800    10.05300    0.03000
C18   1    0.729922    0.704270    0.058036    10.05300   10.03000
C19   1    0.693055    0.750689    0.099284    10.05300    0.05496
C20   1    0.638671    0.723268    0.094543    10.05300    0.05945
C21   1    0.615413    0.733094    0.160180    10.05300    0.04322
C22   1    0.582259    0.677273    0.188582    10.05300    0.06128
C23   1    0.588692    0.646121    0.254369    10.05300    0.05806
C24   1    0.569938    0.565810    0.286508    10.05300    0.05522
C25   1    0.549000    0.505261    0.236809    10.05300    0.07884
C26   1    0.553641    0.412182    0.251530    10.05300    0.06779
C27   1    0.561241    0.344258    0.197803    10.05300    0.05473
C28   1    0.597176    0.276669    0.218522    10.05300    0.05751
C29   1    0.633565    0.239231    0.182039    10.05300    0.06889
C30   1    0.630012    0.259735    0.112658    10.05300    0.04177
C31   1    0.675333    0.269348    0.073674    10.05300    0.05695
C32   1    0.725638    0.251394    0.103752    10.05300    0.06014
C33   1    0.771533    0.302965    0.088973    10.05300    0.06513
C34   1    0.763662    0.384611    0.042849    10.05300    0.08934
C35   1    0.803707    0.453131    0.057566    10.05300    0.09055
C36   1    0.788109    0.541464    0.035258    10.05300    0.08732
C37   1    0.812642    0.615162    0.071914    10.05300    0.06345
C38   1    0.780475    0.694787    0.086172    10.05300    0.03855
C39   1    0.792346    0.728791    0.152083    10.05300    0.04884
C40   1    0.759787    0.756912    0.198073    10.05300    0.00637
C41   1    0.707481    0.775607    0.168303    10.05300    0.03710
C42   1    0.660439    0.767614    0.204506    10.05300    0.02946
C43   1    0.667551    0.747696    0.273030    10.05300    0.04248
C44   1    0.628503    0.692520    0.304765    10.05300    0.05055
C45   1    0.653621    0.647346    0.354911    10.05300    0.05625
C46   1    0.643830    0.562974    0.379269    10.05300    0.08461
C47   1    0.595111    0.532332    0.342777    10.05300    0.06568
C48   1    0.604355    0.443062    0.355360    10.05300    0.08121
C49   1    0.581256    0.383745    0.307898    10.05300    0.07085
C50   1    0.608612    0.300066    0.291727    10.05300    0.07330
C51   1    0.657666    0.287546    0.322403    10.05300    0.08165
C52   1    0.696718    0.248921    0.285214    10.05300    0.04631
C53   1    0.686488    0.221452    0.214960    10.05300    0.05759
C54   1    0.727677    0.227093    0.173050    10.05300    0.07433
C55   1    0.779866    0.260118    0.201448    10.05300    0.07075
C56   1    0.802719    0.304832    0.139012    10.05300    0.03889
C57   1    0.838044    0.372650    0.157524    10.05300    0.07696
C58   1    0.841593    0.444210    0.107926    10.05300    0.08144
C59   1    0.855553    0.518479    0.147780    10.05300    0.02775
C60   1    0.846703    0.606284    0.127480    10.05300    0.06281
C61   1    0.836701    0.670238    0.180555    10.05300    0.06155
C62   1    0.840864    0.643957    0.247638    10.05300    0.04885
C63   1    0.804390    0.668699    0.294646    10.05300    0.04861
C64   1    0.762866    0.731779    0.270375    10.05300    0.04822
C65   1    0.717332    0.731361    0.304077    10.05300    0.00086
C66   1    0.714456    0.662358    0.358024    10.05300    0.02928
C67   1    0.750725    0.594588    0.372034    10.05300    0.06330
C68   1    0.734131    0.510615    0.400047    10.05300    0.04839
C69   1    0.683581    0.503224    0.399709    10.05300    0.07694
C70   1    0.652414    0.424148    0.385645    10.05300    0.06634
C71   1    0.683863    0.354001    0.373093    10.05300    0.05213
C72   1    0.741788    0.347785    0.354876    10.05300    0.05440
C73   1    0.750432    0.274839    0.308644    10.05300    0.07084
C74   1    0.789637    0.295301    0.264916    10.05300    0.04730
C75   1    0.828532    0.366781    0.272891    10.05300    0.07539
C76   1    0.852431    0.398385    0.223623    10.05300    0.06813
C77   1    0.867962    0.490373    0.211973    10.05300    0.03621
C78   1    0.858910    0.548629    0.261753    10.05300    0.04767
C79   1    0.830077    0.515717    0.323436    10.05300    0.06139
C80   1    0.799329    0.594092    0.341806    10.05300    0.05865
C81   1    0.810855    0.436081    0.331825    10.05300    0.06834
C82   1    0.764090    0.424239    0.368981    10.05300    0.06935
AFIX   0
PART   0
 
RESI 0
NI1   4    0.519700    0.500000    0.417789    10.50000    0.01203    0.01277 =
         0.01767    0.00000    0.00199    0.00000
N1    3    0.520795    0.369534    0.416456    11.00000    0.01411    0.01510 =
         0.02077    0.00055    0.00260   -0.00018
N2    3    0.465162    0.500000    0.342528    10.50000    0.01471    0.01597 =
         0.01965    0.00000    0.00156    0.00000
N3    3    0.576405    0.500000    0.490437    10.50000    0.01363    0.01486 =
         0.01984    0.00000    0.00213    0.00000
C83   1    0.552894    0.313603    0.456338    11.00000    0.01523    0.01449 =
         0.02382    0.00172    0.00369    0.00119
C84   1    0.543115    0.221733    0.438857    11.00000    0.01885    0.01453 =
         0.02996    0.00104    0.00227    0.00024
C85   1    0.504392    0.221436    0.387294    11.00000    0.01961    0.01451 =
         0.03006   -0.00044    0.00204   -0.00019
C86   1    0.490746    0.313527    0.374373    11.00000    0.01670    0.01549 =
         0.02296   -0.00039    0.00292   -0.00097
C87   1    0.453116    0.340249    0.324625    11.00000    0.01757    0.01644 =
         0.02340   -0.00135    0.00119   -0.00209
AFIX  43
H87   2    0.433686    0.295806    0.299497    11.00000   -1.20000
AFIX   0
C88   1    0.442157    0.427778    0.309377    11.00000    0.01585    0.01803 =
         0.02015   -0.00092    0.00123   -0.00114
C89   1    0.405278    0.454964    0.253773    11.00000    0.01726    0.02108 =
         0.02349   -0.00017   -0.00121   -0.00054
C90   1    0.643888    0.454667    0.569847    11.00000    0.01465    0.02087 =
         0.01977    0.00074    0.00108    0.00100
C91   1    0.601907    0.427892    0.520766    11.00000    0.01358    0.01667 =
         0.02039    0.00163    0.00232    0.00107
C92   1    0.590441    0.340539    0.505779    11.00000    0.01531    0.01603 =
         0.02278    0.00147    0.00190    0.00201
AFIX  43
H92   2    0.609654    0.296080    0.531160    11.00000   -1.20000
AFIX   0
C93   1    0.572532    0.144523    0.471965    11.00000    0.02383    0.01608 =
         0.04132    0.00367   -0.00150    0.00237
AFIX  23
H93A  2    0.551931    0.089564    0.462368    11.00000   -1.20000
H93B  2    0.575513    0.153500    0.521643    11.00000   -1.20000
AFIX   0
C94   1    0.628176    0.132750    0.447367    11.00000    0.02897    0.02555 =
         0.05236   -0.00121    0.00330    0.01061
AFIX 137
H94A  2    0.646331    0.084193    0.472463    11.00000   -1.50000
H94B  2    0.648338    0.187772    0.455050    11.00000   -1.50000
H94C  2    0.625379    0.118768    0.398887    11.00000   -1.50000
AFIX   0
C95   1    0.480709    0.144399    0.347726    11.00000    0.02660    0.01622 =
         0.03997   -0.00261   -0.00198   -0.00289
AFIX  23
H95A  2    0.441891    0.152564    0.341380    11.00000   -1.20000
H95B  2    0.487562    0.089292    0.374143    11.00000   -1.20000
AFIX   0
C96   1    0.502903    0.133831    0.278189    11.00000    0.03657    0.02723 =
         0.04434   -0.01435    0.00116    0.00082
AFIX 137
H96A  2    0.486679    0.082034    0.255061    11.00000   -1.50000
H96B  2    0.541332    0.125576    0.284065    11.00000   -1.50000
H96C  2    0.494886    0.187127    0.250986    11.00000   -1.50000
AFIX   0
C97   1    0.376205    0.392337    0.205395    11.00000    0.02369    0.02502 =
         0.02886   -0.00265   -0.00574   -0.00308
AFIX  23
H97A  2    0.346792    0.424593    0.180532    11.00000   -1.20000
H97B  2    0.360623    0.344133    0.231474    11.00000   -1.20000
AFIX   0
C98   1    0.411597    0.351470    0.154251    11.00000    0.03451    0.03348 =
         0.02617   -0.00560   -0.00327   -0.00245
AFIX 137
H98A  2    0.390351    0.312697    0.123204    11.00000   -1.50000
H98B  2    0.439731    0.316724    0.178373    11.00000   -1.50000
H98C  2    0.427374    0.398815    0.128422    11.00000   -1.50000
AFIX   0
C99   1    0.681661    0.392783    0.607650    11.00000    0.01887    0.02574 =
         0.02379    0.00310   -0.00064    0.00282
AFIX  23
H99A  2    0.662102    0.339969    0.621964    11.00000   -1.20000
H99B  2    0.697174    0.422768    0.648956    11.00000   -1.20000
AFIX   0
C100  1    0.726218    0.363041    0.564626    11.00000    0.02285    0.04126 =
         0.03508    0.00846    0.00505    0.01214
AFIX 137
H10A  2    0.750938    0.325047    0.591817    11.00000   -1.50000
H10B  2    0.745054    0.415243    0.549272    11.00000   -1.50000
H10C  2    0.711199    0.329788    0.525237    11.00000   -1.50000
AFIX   0
C101  1    0.656814    0.000000    0.150754    10.50000    0.05741    0.10597 =
         0.02279    0.00000   -0.00187    0.00000
AFIX  43
H101  2    0.644218    0.000000    0.104352    10.50000   -1.20000
AFIX   0
C102  1    0.710850    0.000000    0.168319    10.50000    0.04793    0.07283 =
         0.02369    0.00000    0.01228    0.00000
AFIX  43
H102  2    0.735193    0.000000    0.134031    10.50000   -1.20000
AFIX   0
C103  1    0.729196    0.000000    0.235956    10.50000    0.03191    0.04975 =
         0.02910    0.00000    0.00740    0.00000
AFIX  43
H103  2    0.766161    0.000000    0.248187    10.50000   -1.20000
AFIX   0
C104  1    0.693503    0.000000    0.285772    10.50000    0.03276    0.04212 =
         0.02336    0.00000    0.00481    0.00000
AFIX  43
H104  2    0.705996    0.000000    0.332210    10.50000   -1.20000
AFIX   0
C105  1    0.639634    0.000000    0.267855    10.50000    0.03237    0.04586 =
         0.02921    0.00000    0.00730    0.00000
AFIX  43
H105  2    0.615200    0.000000    0.302035    10.50000   -1.20000
AFIX   0
C106  1    0.621342    0.000000    0.200280    10.50000    0.03537    0.08656 =
         0.03387    0.00000   -0.00348    0.00000
AFIX  43
H106  2    0.584378    0.000000    0.188037    10.50000   -1.20000
AFIX   0
PART   1
C107  1    0.554170    0.128268   -0.000597    10.50000    0.06037
AFIX  43
H107  2    0.591693    0.125089    0.001130    10.50000   -1.20000
AFIX   0
C108  1    0.529338    0.128969    0.056452    10.50000    0.05065
AFIX  43
H108  2    0.550889    0.127144    0.097776    10.50000   -1.20000
AFIX   0
C109  1    0.474563    0.132135    0.061311    10.50000    0.07051
AFIX  43
H109  2    0.458836    0.136593    0.103293    10.50000   -1.20000
AFIX   6
PART  -2
C110  1    0.525777    0.111537   -0.038279    10.25000    0.04290
H110  2    0.542746    0.100419   -0.078666    10.25000   -1.20000
C111  1    0.553950    0.103188    0.024343    10.25000    0.04423
H111  2    0.590174    0.086362    0.026756    10.25000   -1.20000
C112  1    0.529122    0.119456    0.083436    10.25000    0.04054
H112  2    0.548377    0.113748    0.126235    10.25000   -1.20000
C113  1    0.476120    0.144074    0.079907    10.25000    0.03979
H113  2    0.459151    0.155191    0.120295    10.25000   -1.20000
C114  1    0.447947    0.152424    0.017285    10.25000    0.03907
H114  2    0.411722    0.169249    0.014874    10.25000   -1.20000
C115  1    0.472774    0.136157   -0.041808    10.25000    0.22177
H115  2    0.453519    0.141865   -0.084606    10.25000   -1.20000
 
HKLF 4
 
REM  mn2044 in C2/m  Sm@C82 C2(5) NiOEP 2 benzene
REM R1 =  0.0678 for  11674 Fo > 4sig(Fo)  and  0.0821 for all  14174 data
REM   1098 parameters refined using   2752 restraints
 
END  
     
WGHT      0.1106     21.1893 
REM Highest difference peak  1.382,  deepest hole -1.676,  1-sigma level  0.104
Q1    1   0.6670  0.5000  0.3694  10.50000  0.05    1.38
Q2    1   0.7622  0.5000  0.1711  10.50000  0.05    1.02
Q3    1   0.4907  0.2049  0.0224  11.00000  0.05    0.99
Q4    1   0.8021  0.7107  0.1624  11.00000  0.05    0.88
Q5    1   0.7302  0.4497  0.1287  11.00000  0.05    0.88
Q6    1   0.7967  0.6928  0.2855  11.00000  0.05    0.87
Q7    1   0.5770  0.5000  0.2919  10.50000  0.05    0.82
Q8    1   0.7513  0.4314  0.1634  11.00000  0.05    0.80
Q9    1   0.6221  0.3651  0.3087  11.00000  0.05    0.80
Q10   1   0.6820  0.5944  0.1603  11.00000  0.05    0.78
Q11   1   0.5887  0.5738  0.2913  11.00000  0.05    0.77
Q12   1   0.6503  0.5610  0.1858  11.00000  0.05    0.76
Q13   1   0.7214  0.5106  0.3904  11.00000  0.05    0.75
Q14   1   0.6685  0.6106  0.3521  11.00000  0.05    0.75
Q15   1   0.8010  0.5675  0.0337  11.00000  0.05    0.71
Q16   1   0.7382  0.5000  0.1183  10.50000  0.05    0.70
Q17   1   0.6766  0.7550  0.2600  11.00000  0.05    0.68
Q18   1   0.5993  0.4131  0.0294  11.00000  0.05    0.67
Q19   1   0.6595  0.4474  0.2190  11.00000  0.05    0.66
Q20   1   0.7288  0.7171  0.3162  11.00000  0.05    0.64
;
